# Supplementary material for: Photoinduced C–H heteroarylation of enamines via quadruple cleavage of CF2Br2
Source: Royal Society of Chemistry journal article supplement (doi:10.1039/d3qo01474f), 2023-01-01
Supplement: d3qo01474f1.pdf [file d3qo01474f1.pdf]

## *Supporting Information*

### **Photoinduced C–H Heteroarylation of Enamines via Quadruple Cleavage of CF<sub>2</sub>Br<sub>2</sub>**

Wanqing Zuo,<sup>a,b</sup> Lingling Zuo,<sup>a</sup> Xiao Geng,<sup>\*a</sup> Zhifang Li,<sup>b</sup> and Lei Wang<sup>\*a,b,c</sup>

<sup>a</sup>*Advanced Research Institute and School of Pharmaceutical Sciences, Taizhou University, Jiaojiang 318000, Zhejiang, P. R. China*

<sup>\*</sup>*Corresponding authors; E-mail: xiaogeng\_@tzc.edu.cn; leiwang88@hotmail.com*

<sup>b</sup>*Key Laboratory of Organosilicon Chemistry and Material Technology of Ministry of Education, Hangzhou Normal University, Hangzhou 311121, Zhejiang, P. R. China*

<sup>c</sup>*State Key Laboratory of Organometallic Chemistry, Shanghai Institute of Organic Chemistry, Shanghai 200032, P. R. China*

#### *Table of Contents*

|    |                                                                                              |     |
|----|----------------------------------------------------------------------------------------------|-----|
| 1. | General considerations.....                                                                  | S2  |
| 2. | General procedures for the synthesis of substrates.....                                      | S3  |
| 3. | Optimization reaction conditions.....                                                        | S5  |
| 4. | Characterization data of products.....                                                       | S7  |
| 5. | Unsuccessful substrates.....                                                                 | S30 |
| 6. | Crystallographic data and molecular structure of <b>4a</b> .....                             | S31 |
| 7. | Control experiment.....                                                                      | S33 |
| 8. | <sup>1</sup> H NMR, <sup>13</sup> C NMR and <sup>19</sup> F NMR spectra of the products..... | S34 |

## 1. General considerations

All  $^1\text{H}$  NMR,  $^{13}\text{C}$  NMR and  $^{19}\text{F}$  NMR spectra were recorded on a 400 MHz Bruker FT-NMR spectrometer (400/100/376 MHz). All chemical shifts are given as  $\delta$  value (ppm) with reference to tetramethylsilane (TMS) as an internal standard. The peak patterns are indicated as follows: s, singlet; d, doublet; t, triplet; m, multiplet; q, quartet. The coupling constants,  $J$ , are reported in Hertz (Hz). High resolution mass spectroscopy data of the product were collected on an Agilent Technologies 6540 UHD Accurate-Mass Q-TOF LC/MS (ESI). Crystallographic data of product **4a** was collected on Bruker SMART APEX II (Mo target, voltage 50 KV, current 30 mA). The chemicals and solvents were purchased from commercial suppliers either Aldrich (USA), or Shanghai Chemical Company (P. R. China). Products were purified by flash chromatography on 200–300 mesh silica gels,  $\text{SiO}_2$ .

## 2. General procedures for the synthesis of products

### 2.1 General procedure for the synthesis 4/5 (4a as example)

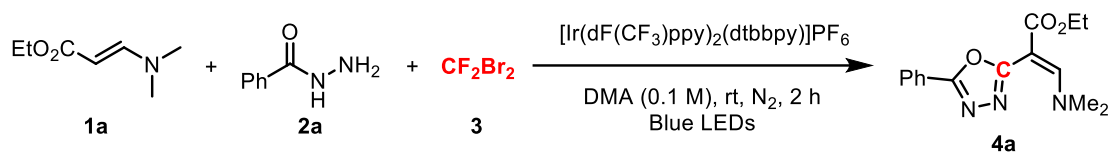

Under nitrogen atmosphere, a 10 mL Schlenk tube equipped with a magnetic stir bar was charged with enaminone (**1a**, 28.6 mg, 0.20 mmol), benzoyl hydrazine (**2a**, 27.2 mg, 0.20 mmol),  $[\text{Ir}(\text{dF}(\text{CF}_3)\text{ppy})_2(\text{dtbbpy})]\text{PF}_6$  (4.48 mg, 0.004 mmol, 2.0 mol%), difluoro-dibromomethane (**3**, 0.60 mmol, prepare 1.0 mg/mL DMA solution of difluoro-dibromomethane and measure 140  $\mu\text{L}$  with a microsyringe), and DMA (2.0 mL). The reaction mixture was stirred under 2×3 W blue LEDs (450–455 nm) at room temperature with stirring for 2 h. After completion of the reaction, the reaction mixture was diluted with ethyl acetate and  $\text{H}_2\text{O}$ . The resulting mixture was extracted with ethyl acetate, and the combined organic layers were washed with brine, dried over  $\text{Na}_2\text{SO}_4$ , filtered and concentrated. The residue was purified with silica gel chromatography (petroleum ether/ethyl acetate = 3:1, V/V) to give the product **4a** (42.5 mg, 74% yield).

#### Photoreactor

|                                                                                     |                                                                                                                                                                                                                                                                                                                         |
|-------------------------------------------------------------------------------------|-------------------------------------------------------------------------------------------------------------------------------------------------------------------------------------------------------------------------------------------------------------------------------------------------------------------------|
|  | <p>Manufacturer: GeAo Chemical Company</p> <p>Model: 2×3 W, blue LEDs</p> <p>Broadband source: <math>\lambda = 450\text{--}455\text{ nm}</math></p> <p>Material of the irradiation vessel: Borosilicate reaction tube</p> <p>Distance from the light source to the irradiation vessel: 3.0 cm</p> <p>No any filters</p> |
|-------------------------------------------------------------------------------------|-------------------------------------------------------------------------------------------------------------------------------------------------------------------------------------------------------------------------------------------------------------------------------------------------------------------------|

**Figure S1.** Photoreactor used in this research (2×3 W blue LEDs)

### 2.2 General procedure for the synthesis 6 (6a as example)

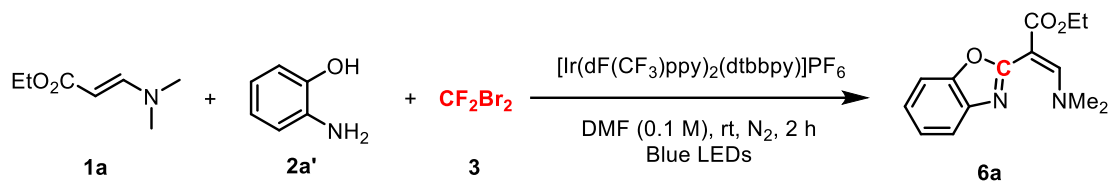

Under nitrogen atmosphere, a 10 mL Schlenk tube equipped with a magnetic stir bar was charged with enaminone (**1a**, 28.6 mg, 0.20 mmol), 2-aminophenol (**2a'**, 21.8 mg, 0.20 mmol), [Ir(dF(CF<sub>3</sub>)ppy)<sub>2</sub>(dtbbpy)]PF<sub>6</sub> (4.48 mg, 0.004 mmol, 2.0 mol%), difluoro-dibromomethane (**3**, 0.60 mmol, prepare 1.0 mg/mL DMF solution of difluoro-dibromomethane and measure 140 μL with a microsyringe), and DMF (2.0 mL). The reaction mixture was stirred under 2×3 W blue LEDs (450–455 nm) at room temperature with stirring for 2 h. After completion of the reaction, the reaction mixture was diluted with ethyl acetate and H<sub>2</sub>O. The resulting mixture was extracted with ethyl acetate, and the combined organic layers were washed with brine, dried over Na<sub>2</sub>SO<sub>4</sub>, filtered and concentrated. The residue was purified with silica gel chromatography (petroleum ether/ethyl acetate = 3:1, V/V) to give the product **6a** (29.1 mg, 56% yield).

### 2.3 General procedure for the synthesis 4a in 4.0 mmol scale

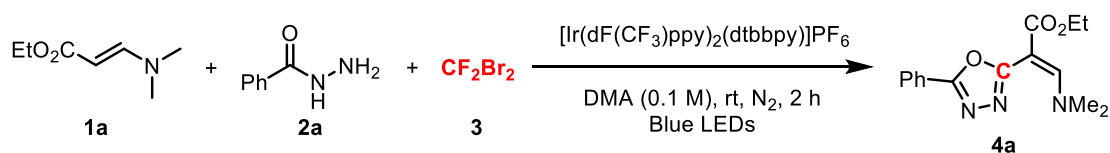

Under nitrogen atmosphere, a 200 mL Schlenk bottle equipped with a magnetic stir bar was charged with enaminone (**1a**, 572.8 mg, 4.0 mmol), benzoyl hydrazine (**2a**, 544.6 mg, 4.0 mmol), [Ir(dF(CF<sub>3</sub>)ppy)<sub>2</sub>(dtbbpy)]PF<sub>6</sub> (22.4 mg, 0.02 mmol, 0.5 mol%), difluorodibromomethane (**3**, 12.0 mmol, prepare 1.0 mg/mL DMA solution of difluoro-dibromomethane and measure 2.8 mL with a microsyringe), and DMA (40.0 mL). The reaction mixture was stirred under blue LEDs at room temperature with stirring for 2 h. After completion of the reaction, the reaction mixture was diluted with ethyl acetate and H<sub>2</sub>O. The resulting mixture was extracted with ethyl acetate, and the combined organic layers were washed with brine, dried over Na<sub>2</sub>SO<sub>4</sub>, filtered and

concentrated. The residue was purified with silica gel chromatography (petroleum ether/ethyl acetate = 3:1, V/V) to give the product **4a** (735.0 mg, 64% yield).

### 3. Optimization reaction conditions

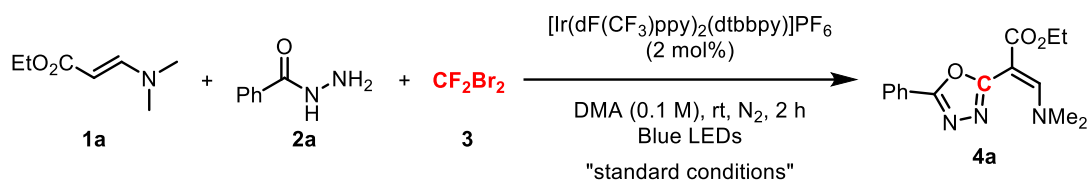

| entry | photocatalyst | solvent            | additive                        | the ratio of substrates<br><b>1a:2a:3</b> | yield of <b>4a</b><br>(%) <sup>b</sup> |
|-------|---------------|--------------------|---------------------------------|-------------------------------------------|----------------------------------------|
| 1     | <b>PC1</b>    | DMA                | –                               | 1:1:3                                     | 70                                     |
| 2     | <b>PC2</b>    | <b>DMA</b>         | –                               | <b>1:1:3</b>                              | <b>74</b>                              |
| 3     | <b>PC3</b>    | DMA                | –                               | 1:1:3                                     | 69                                     |
| 4     | <b>PC4</b>    | DMA                | –                               | 1:1:3                                     | 21                                     |
| 5     | <b>PC5</b>    | DMA                | –                               | 1:1:3                                     | 55                                     |
| 6     | <b>PC6</b>    | DMA                | –                               | 1:1:3                                     | 61                                     |
| 7     | <b>PC7</b>    | DMA                | –                               | 1:1:3                                     | 27                                     |
| 8     | <b>PC8</b>    | DMA                | –                               | 1:1:3                                     | 20                                     |
| 9     | <b>PC2</b>    | DMSO               | –                               | 1:1:3                                     | 23                                     |
| 10    | <b>PC2</b>    | DMF                | –                               | 1:1:3                                     | 47                                     |
| 11    | <b>PC2</b>    | CH <sub>3</sub> CN | –                               | 1:1:3                                     | 27                                     |
| 12    | <b>PC2</b>    | acetone            | –                               | 1:1:3                                     | 51                                     |
| 13    | <b>PC2</b>    | 1,4-dioxane        | –                               | 1:1:3                                     | 38                                     |
| 14    | <b>PC2</b>    | TFEA               | –                               | 1:1:3                                     | 20                                     |
| 15    | <b>PC2</b>    | DMA                | –                               | 1:0.8:3                                   | 71                                     |
| 16    | <b>PC2</b>    | DMA                | –                               | 1:1.5:3                                   | 66                                     |
| 17    | <b>PC2</b>    | DMA                | –                               | 1:2:3                                     | 68                                     |
| 18    | <b>PC2</b>    | DMA                | –                               | 1:3:3                                     | 63                                     |
| 19    | <b>PC2</b>    | DMA                | –                               | 1:1:1                                     | 50                                     |
| 20    | <b>PC2</b>    | DMA                | –                               | 1:1:2                                     | 61                                     |
| 21    | <b>PC2</b>    | DMA                | –                               | 1:1:4                                     | 69                                     |
| 22    | <b>PC2</b>    | DMA                | Na <sub>2</sub> CO <sub>3</sub> | 1:1:3                                     | 52                                     |
| 23    | <b>PC2</b>    | DMA                | NaHCO <sub>3</sub>              | 1:1:3                                     | 55                                     |
| 24    | <b>PC2</b>    | DMA                | K <sub>3</sub> PO <sub>4</sub>  | 1:1:3                                     | 52                                     |

|                 |            |     |                |       |       |
|-----------------|------------|-----|----------------|-------|-------|
| 25              | <b>PC2</b> | DMA | <i>t</i> -BuOK | 1:1:3 | 50    |
| 26              | <b>PC2</b> | DMA | TsOH           | 1:1:3 | 43    |
| 27              | <b>PC2</b> | DMA | TFA            | 1:1:3 | 40    |
| 28              | <b>PC2</b> | DMA | HCOOH          | 1:1:3 | 67    |
| 29              | –          | DMA | –              | 1:1:3 | trace |
| 30 <sup>c</sup> | <b>PC2</b> | DMA | –              | 1:1:3 | N.D.  |
| 31 <sup>d</sup> | <b>PC2</b> | DMA | –              | 1:1:3 | 59    |
| 32 <sup>e</sup> | <b>PC2</b> | DMA | –              | 1:1:3 | 29    |
| 33 <sup>f</sup> | <b>PC2</b> | DMA | –              | 1:1:3 | N.D.  |
| 34 <sup>g</sup> | <b>PC2</b> | DMA | –              | 1:1:3 | N.D.  |
| 35 <sup>h</sup> | <b>PC2</b> | DMA | –              | 1:1:3 | N.D.  |

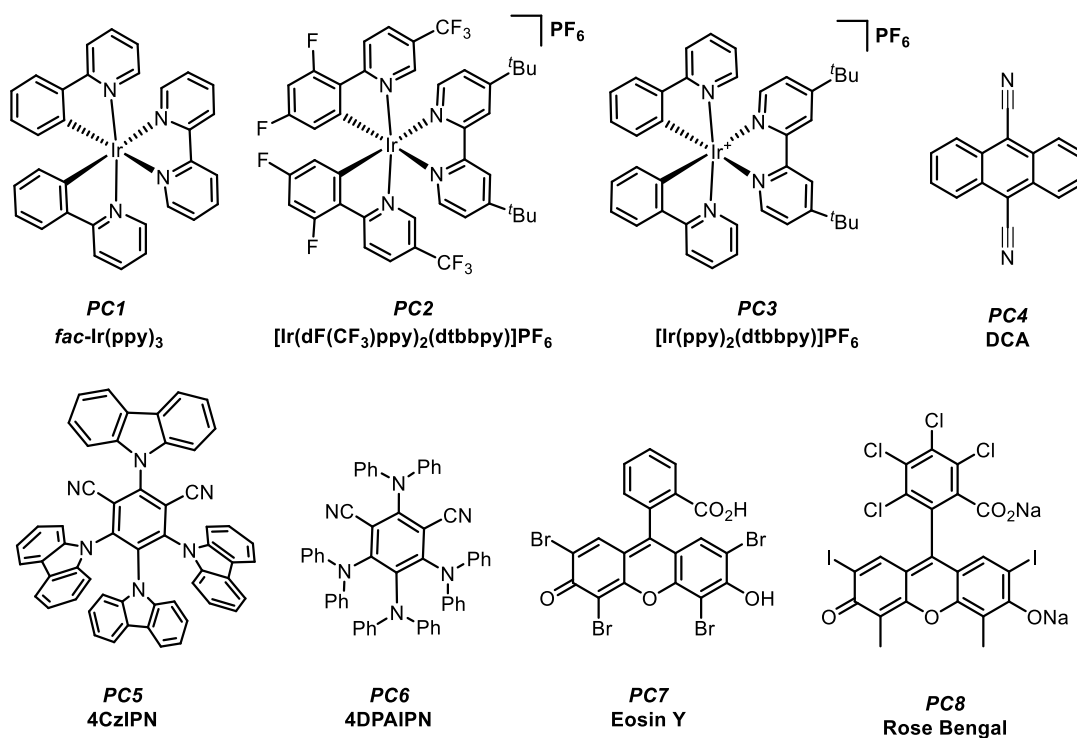

<sup>a</sup>Reaction conditions: **1a** (0.2 mmol), **2a** (amount indicated in this Table), **3** (amount indicated in this Table), photocatalyst (2 mol%), additive (1.0 equiv.) in solvent (2.0 mL), N<sub>2</sub> atmosphere, room temperature, under 2×3 W blue LEDs (450–455 nm) irradiation for 2h. <sup>b</sup>Isolated yield. <sup>c</sup>In the absence of light. <sup>d</sup>Under air atmosphere. <sup>e</sup>CFBr<sub>3</sub> instead of CF<sub>2</sub>Br<sub>2</sub>. <sup>f</sup>CBr<sub>4</sub> instead of CF<sub>2</sub>Br<sub>2</sub>. <sup>g</sup>CCl<sub>3</sub>Br instead of CF<sub>2</sub>Br<sub>2</sub>. <sup>h</sup>CF<sub>3</sub>I instead of CF<sub>2</sub>Br<sub>2</sub>.

#### 4. Characterization data of products

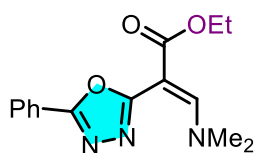

4a

**Ethyl (*E*)-3-(dimethylamino)-2-(5-phenyl-1,3,4-oxadiazol-2-yl)acrylate:** 42.5 mg, 74% yield. White solid, melting point: 98.3–99.5 °C (Flash column chromatography eluent, petroleum ether/ethyl acetate = 3/1, V/V). **<sup>1</sup>H NMR** (400 MHz, CDCl<sub>3</sub>) δ 8.06 (d, *J* = 8.0 Hz, 2H), 7.80 (s, 1H), 7.49 (d, *J* = 6.4 Hz, 3H), 4.16 (q, *J* = 7.2 Hz, 2H), 3.18 (s, 3H), 2.64 (s, 3H), 1.19 (t, *J* = 7.2 Hz, 3H). **<sup>13</sup>C NMR** (100 MHz, CDCl<sub>3</sub>) δ 167.6, 164.9, 162.0, 154.1, 131.4, 128.9, 126.7, 124.3, 81.6, 60.1, 47.0, 39.7, 14.4. **HRMS (ESI) *m/z*:** Calcd for C<sub>15</sub>H<sub>18</sub>N<sub>3</sub>O<sub>3</sub><sup>+</sup> [M + H]<sup>+</sup>: 288.1343; found: 288.1341.

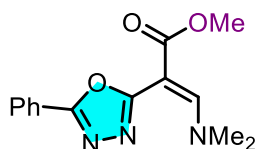

4b

**Methyl (*E*)-3-(dimethylamino)-2-(5-phenyl-1,3,4-oxadiazol-2-yl)acrylate:** 37.1 mg, 68% yield. Yellow solid, melting point: 97.8–99.5 °C (Flash column chromatography eluent, petroleum ether/ethyl acetate = 3/1, V/V). **<sup>1</sup>H NMR** (400 MHz, CDCl<sub>3</sub>) δ 8.05 (d, *J* = 4.4 Hz, 2H), 7.79 (s, 1H), 7.60–7.30 (m, 3H), 3.66 (s, 3H), 3.16 (s, 3H), 2.60 (s, 3H). **<sup>13</sup>C NMR** (100 MHz, CDCl<sub>3</sub>) δ 168.0, 164.9, 161.8, 154.2, 131.4, 128.9, 126.7, 124.2, 81.1, 51.4, 47.2, 39.3. **HRMS (ESI) *m/z*:** Calcd for C<sub>14</sub>H<sub>15</sub>N<sub>3</sub>NaO<sub>3</sub><sup>+</sup> [M + Na]<sup>+</sup>: 296.1006; found: 296.1004.

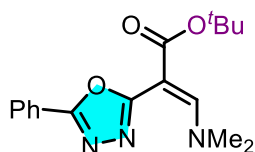

4c

**tert-Butyl (*E*)-3-(dimethylamino)-2-(5-phenyl-1,3,4-oxadiazol-2-yl)acrylate:** 23.6 mg, 41% yield. Yellow solid, melting point: 100.9–102.6 °C (Flash column chromatography eluent, petroleum ether/ethyl acetate = 3/1, V/V). **<sup>1</sup>H NMR** (400 MHz, CDCl<sub>3</sub>) δ 8.08–8.00 (m, 2H), 7.70 (s, 1H), 7.51–7.45 (m, 3H), 3.12 (s, 3H), 2.64 (s, 3H), 1.40 (s, 9H). **<sup>13</sup>C NMR** (100 MHz, CDCl<sub>3</sub>) δ 166.9, 164.7, 162.3, 153.7, 131.3, 128.9, 126.5, 124.3, 82.9, 79.8, 46.9, 39.6, 28.3. **HRMS (ESI) *m/z*:** Calcd for C<sub>17</sub>H<sub>21</sub>N<sub>3</sub>NaO<sub>3</sub><sup>+</sup> [M + Na]<sup>+</sup>: 338.1475; found: 338.1472.

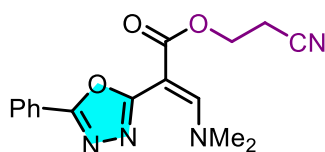

**4d**

**2-cyanoethyl (*E*)-3-(dimethylamino)-2-(5-phenyl-1,3,4-oxadiazol-2-yl)acrylate:** 44.3 mg, 71% yield. Yellow solid, melting point: 95.5–97.7 °C (Flash column chromatography eluent, petroleum ether/ethyl acetate = 3/1, V/V). **<sup>1</sup>H NMR** (400 MHz, CDCl<sub>3</sub>) δ 8.06 (d, *J* = 7.2 Hz, 2H), 7.81 (s, 1H), 7.47 (d, *J* = 5.6 Hz, 3H), 4.35–4.22 (m, 2H), 3.19 (s, 3H), 2.82–2.53 (m, 5H). **<sup>13</sup>C NMR** (100 MHz, CDCl<sub>3</sub>) δ 166.7, 165.1, 161.3, 154.7, 131.5, 128.9, 126.7, 123.9, 117.0, 80.3, 58.3, 47.4, 39.5, 18.1. **HRMS (ESI) *m/z*:** Calcd for C<sub>16</sub>H<sub>16</sub>N<sub>4</sub>NaO<sub>3</sub><sup>+</sup> [M + Na]<sup>+</sup>: 335.1115; found: 335.1110.

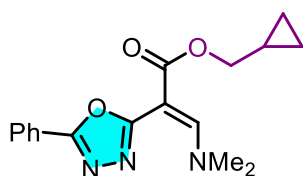

**4e**

**Cyclopropylmethyl (*E*)-3-(dimethylamino)-2-(5-phenyl-1,3,4-oxadiazol-2-yl)acrylate:** 40.1 mg, 64% yield. Yellow solid, melting point: 116.7–118.7 °C (Flash column chromatography eluent, petroleum ether/ethyl acetate = 3/1, V/V). **<sup>1</sup>H NMR** (400 MHz, CDCl<sub>3</sub>) δ 8.03 (d, *J* = 7.6 Hz, 2H), 7.77 (s, 1H), 7.46 (d, *J* = 6.0 Hz, 3H), 3.92 (d, *J* = 6.8 Hz, 2H), 3.15 (s, 3H), 2.61 (s, 3H), 1.10–0.97 (m, 1H), 0.46–0.38 (m, 2H), 0.22–0.14 (m, 2H). **<sup>13</sup>C NMR** (100 MHz, CDCl<sub>3</sub>) δ 167.6, 164.8, 161.9, 154.0,



131.3, 128.8, 126.5, 124.2, 81.4, 68.4, 47.1, 39.4, 9.8, 2.9. **HRMS (ESI) *m/z***: Calcd for C<sub>17</sub>H<sub>19</sub>N<sub>3</sub>NaO<sub>3</sub><sup>+</sup> [M + Na]<sup>+</sup>: 336.1319; found: 336.1316.

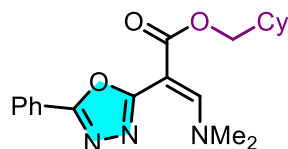

**4f**

**Cyclohexylmethyl (*E*)-3-(dimethylamino)-2-(5-phenyl-1,3,4-oxadiazol-2-yl)**

**acrylate**: 34.1 mg, 48% yield. Yellow solid, melting point: 100.3–102.4 °C (Flash column chromatography eluent, petroleum ether/ethyl acetate = 3/1, V/V). **<sup>1</sup>H NMR** (400 MHz, CDCl<sub>3</sub>) δ 8.10–7.97 (m, 2H), 7.77 (s, 1H), 7.46 (d, *J* = 6.4 Hz, 3H), 3.89 (d, *J* = 6.4 Hz, 2H), 3.16 (s, 3H), 2.62 (s, 3H), 1.67–1.47 (m, 6H), 1.17–0.96 (m, 3H), 0.93–0.81 (m, 2H). **<sup>13</sup>C NMR** (100 MHz, CDCl<sub>3</sub>) δ 167.7, 164.7, 161.9, 154.0, 131.3, 128.8, 126.5, 124.1, 81.4, 69.1, 47.1, 39.5, 37.1, 29.4, 26.1, 25.5. **HRMS (ESI) *m/z***: Calcd for C<sub>20</sub>H<sub>26</sub>N<sub>3</sub>O<sub>3</sub><sup>+</sup> [M + H]<sup>+</sup>: 356.1969; found: 356.1967.

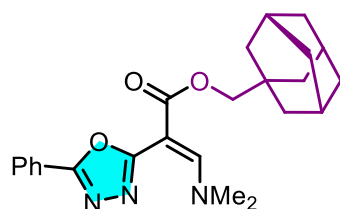

**4g**

**Adamantan-1-ylmethyl (*E*)-3-(dimethylamino)-2-(5-phenyl-1,3,4-oxadiazol-2-yl)**

**acrylate**: 52.9 mg, 65% yield. Yellow solid, melting point: 162.4–166.7 °C (Flash column chromatography eluent, petroleum ether/ethyl acetate = 3/1, V/V). **<sup>1</sup>H NMR** (400 MHz, CDCl<sub>3</sub>) δ 8.12–8.00 (m, 2H), 7.77 (s, 1H), 7.51–7.42 (m, 3H), 3.66 (s, 2H), 3.17 (s, 3H), 2.64 (s, 3H), 1.78 (s, 3H), 1.59–1.51 (m, 3H), 1.47–1.35 (m, 9H). **<sup>13</sup>C NMR** (100 MHz, CDCl<sub>3</sub>) δ 167.8, 164.8, 162.1, 153.9, 131.4, 128.8, 126.6, 124.1, 81.3, 73.6, 47.1, 39.6, 39.1, 36.7, 33.2, 27.8. **HRMS (ESI) *m/z***: Calcd for C<sub>24</sub>H<sub>29</sub>N<sub>3</sub>NaO<sub>3</sub><sup>+</sup> [M + Na]<sup>+</sup>: 430.2101; found: 430.2108.

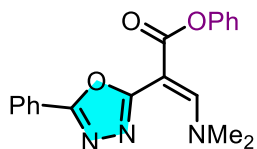

4h

**Phenyl (E)-3-(dimethylamino)-2-(5-phenyl-1,3,4-oxadiazol-2-yl)acrylate:** 33.5 mg, 50% yield. Yellow solid, melting point: 101.8–103.5 °C (Flash column chromatography eluent, petroleum ether/ethyl acetate = 3/1, V/V). <sup>1</sup>H NMR (400 MHz, CDCl<sub>3</sub>) δ 8.13–8.04 (m, 2H), 7.94 (s, 1H), 7.54–7.45 (m, 3H), 7.32 (t, *J* = 8.0 Hz, 2H), 7.16 (t, *J* = 7.2 Hz, 1H), 7.09 (d, *J* = 8.0 Hz, 2H), 3.22 (s, 3H), 2.68 (s, 3H). <sup>13</sup>C NMR (100 MHz, CDCl<sub>3</sub>) δ 166.2, 165.2, 161.7, 155.2, 151.1, 131.6, 129.2, 129.1, 126.8, 125.3, 124.2, 121.9, 80.8, 47.6, 39.8. **HRMS (ESI) *m/z*:** Calcd for C<sub>19</sub>H<sub>17</sub>N<sub>3</sub>NaO<sub>3</sub><sup>+</sup> [*M* + Na]<sup>+</sup> : 358.1162; found: 358.1156.

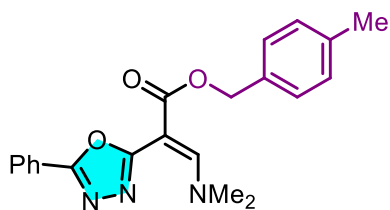

4i

**4-Methylbenzyl (E)-3-(dimethylamino)-2-(5-phenyl-1,3,4-oxadiazol-2-yl)acrylate:** 33.4 mg, 46% yield. Yellow solid, melting point: 80.7–82.3 °C (Flash column chromatography eluent, petroleum ether/ethyl acetate = 3/1, V/V). <sup>1</sup>H NMR (400 MHz, CDCl<sub>3</sub>) δ 8.07–7.96 (m, 2H), 7.83 (s, 1H), 7.54–7.45 (m, 3H), 7.19 (d, *J* = 8.0 Hz, 2H), 7.07 (d, *J* = 8.0 Hz, 2H), 5.15 (s, 2H), 3.18 (s, 3H), 2.65 (s, 3H), 2.30 (s, 3H). <sup>13</sup>C NMR (100 MHz, CDCl<sub>3</sub>) δ 167.4, 164.8, 161.8, 154.4, 137.4, 133.7, 131.4, 128.95, 128.86, 127.6, 126.7, 124.2, 81.4, 65.6, 47.3, 39.6, 21.1. **HRMS (ESI) *m/z*:** Calcd for C<sub>21</sub>H<sub>22</sub>N<sub>3</sub>O<sub>3</sub><sup>+</sup> [*M* + H]<sup>+</sup> : 364.1656; found: 364.1655.

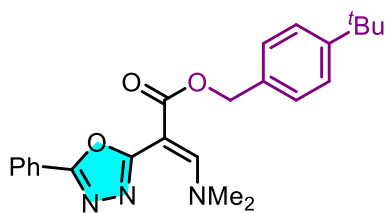

**4j**

**4-(*tert*-Butyl)benzyl (*E*)-3-(dimethylamino)-2-(5-phenyl-1,3,4-oxadiazol-2-yl)**

**acrylate:** 43.7 mg, 54% yield. Yellow oil (Flash column chromatography eluent, petroleum ether/ethyl acetate = 3/1, V/V). **<sup>1</sup>H NMR** (400 MHz, CDCl<sub>3</sub>) δ 8.09–7.97 (m, 2H), 7.83 (s, 1H), 7.53–7.43 (m, 3H), 7.32–7.19 (m, 4H), 5.16 (s, 2H), 3.17 (s, 3H), 2.64 (s, 3H), 1.27 (s, 9H). **<sup>13</sup>C NMR** (100 MHz, CDCl<sub>3</sub>) δ 167.3, 164.8, 161.8, 154.3, 150.5, 133.6, 131.3, 128.8, 127.3, 126.6, 125.1, 124.1, 81.2, 65.4, 47.2, 39.6, 34.3, 31.2. **HRMS (ESI) *m/z*:** Calcd for C<sub>24</sub>H<sub>28</sub>N<sub>3</sub>O<sub>3</sub><sup>+</sup> [M + H]<sup>+</sup>: 406.2125; found: 406.2122.

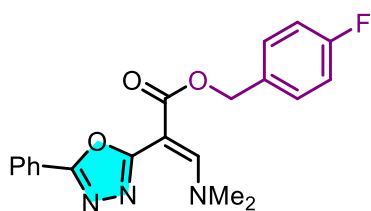

**4k**

**4-Fluorobenzyl (*E*)-3-(dimethylamino)-2-(5-phenyl-1,3,4-oxadiazol-2-yl)acrylate:**

39.6 mg, 54% yield. Yellow oil (Flash column chromatography eluent, petroleum ether/ethyl acetate = 3/1, V/V). **<sup>1</sup>H NMR** (400 MHz, CDCl<sub>3</sub>) δ 8.00 (d, *J* = 6.4 Hz, 2H), 7.82 (s, 1H), 7.53–7.44 (m, 3H), 7.29–7.23 (m, 2H), 6.98–6.88 (m, 2H), 5.13 (s, 2H), 3.18 (s, 3H), 2.64 (s, 3H). **<sup>13</sup>C NMR** (100 MHz, CDCl<sub>3</sub>) δ 167.3, 164.8, 163.5, 162.2 (d, *J* = 246.0 Hz), 154.5, 132.5 (d, *J* = 3.2 Hz), 131.5, 129.4 (d, *J* = 8.3 Hz), 128.9, 126.6, 124.1, 115.1 (d, *J* = 21.4 Hz), 81.1, 64.9, 47.4, 39.6. **<sup>19</sup>F NMR** (376 MHz, CDCl<sub>3</sub>) δ –114.54 (s, 1F). **HRMS (ESI) *m/z*:** Calcd for C<sub>20</sub>H<sub>19</sub>FN<sub>3</sub>O<sub>3</sub><sup>+</sup> [M + H]<sup>+</sup>: 368.1405; found: 368.1403.

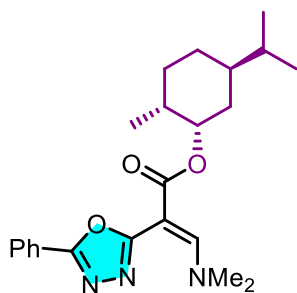

4l

**(1S,2R,5R)-5-(iso-Propyl)-2-methylcyclohexyl (E)-3-(dimethylamino)-2-(5-phenyl-1,3,4-oxadiazol-2-yl)acrylate:** 46.8 mg, 59% yield. Yellow solid, melting point: 124.2–125.3 °C (Flash column chromatography eluent, petroleum ether/ethyl acetate = 3/1, V/V). **<sup>1</sup>H NMR** (400 MHz, CDCl<sub>3</sub>) δ 8.07–7.93 (m, 2H), 7.74 (s, 1H), 7.50–7.40 (m, 3H), 4.78–4.59 (m, 1H), 3.13 (s, 3H), 2.60 (s, 3H), 2.01–1.88 (m, 2H), 1.60–1.50 (m, 2H), 1.41 (s, 1H), 1.22–1.12 (m, 1H), 1.02–0.92 (m, 1H), 0.92–0.82 (m, 2H), 0.80 (d, *J* = 6.4 Hz, 3H), 0.73 (t, *J* = 7.6 Hz, 6H). **<sup>13</sup>C NMR** (100 MHz, CDCl<sub>3</sub>) δ 167.2, 164.6, 161.9, 153.9, 131.3, 128.8, 126.5, 124.1, 81.6, 73.7, 47.1, 46.9, 40.9, 39.5, 34.0, 31.2, 25.9, 23.1, 21.8, 20.6, 16.1. **HRMS (ESI) *m/z*:** Calcd for C<sub>23</sub>H<sub>32</sub>N<sub>3</sub>O<sub>3</sub><sup>+</sup> [M + H]<sup>+</sup>: 398.2438; found: 398.2437.

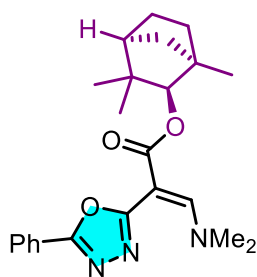

4m

**(1R,2R,4S)-1,3,3-Trimethylbicyclo[2.2.1]heptan-2-yl (E)-3-(dimethylamino)-2-(5-phenyl-1,3,4-oxadiazol-2-yl)acrylate:** 39.5 mg, 50% yield. White solid, melting point: 127.0–129.1 °C (Flash column chromatography eluent, petroleum ether/ethyl acetate = 5/1, V/V). **<sup>1</sup>H NMR** (400 MHz, CDCl<sub>3</sub>) δ 8.11–8.02 (m, 2H), 7.80 (s, 1H), 7.49 (d, *J* = 6.8 Hz, 3H), 4.41 (s, 1H), 3.18 (s, 3H), 2.66 (s, 3H), 1.63 (s, 1H), 1.56–1.45 (m, 2H), 1.34–1.22 (m, 3H), 1.08 (s, 3H), 0.99 (s, 3H), 0.85–0.80 (m, 1H), 0.80–

0.76 (m, 1H), 0.75 (s, 2H).  $^{13}\text{C}$  NMR (100 MHz,  $\text{CDCl}_3$ )  $\delta$  168.1, 164.8, 162.2, 154.0, 131.4, 128.9, 126.6, 124.2, 85.8, 81.4, 48.3, 48.2, 47.2, 41.2, 39.7, 39.6, 29.6, 26.4, 25.7, 20.2, 19.4. **HRMS (ESI)  $m/z$** : Calcd for  $\text{C}_{23}\text{H}_{30}\text{N}_3\text{O}_3^+$   $[\text{M} + \text{H}]^+$ : 396.2282; found: 396.2281.

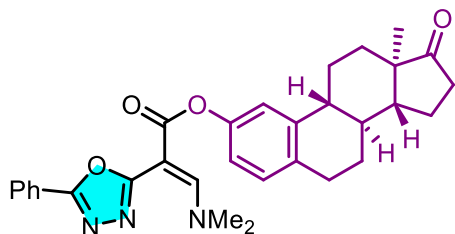

**4n**

**(8*S*,9*R*,13*R*,14*R*)-13-Methyl-17-oxo-7,8,9,11,12,13,14,15,16,17-decahydro-6*H*-cyclopenta[*a*]phenanthren-2-yl (*E*)-3-(dimethylamino)-2-(5-phenyl-1,3,4-**

**oxadiazol-2-yl)acrylate**: 59.3 mg, 58% yield. Yellow solid, melting point: 195.5–196.8 °C (Flash column chromatography eluent, petroleum ether/ethyl acetate = 5/1, V/V).  $^1\text{H}$  NMR (400 MHz,  $\text{CDCl}_3$ )  $\delta$  8.09 (s, 2H), 7.94 (s, 1H), 7.51 (s, 3H), 7.26 (s, 1H), 6.96–6.76 (m, 2H), 3.26 (s, 3H), 2.88 (s, 3H), 2.71 (s, 3H), 2.38 (s, 2H), 2.05–1.95 (m, 1H), 1.62–1.40 (m, 6H), 1.26 (s, 3H), 0.89 (s, 3H).  $^{13}\text{C}$  NMR (100 MHz,  $\text{CDCl}_3$ )  $\delta$  220.9, 166.4, 155.1, 148.9, 137.7, 136.7, 131.5, 129.0, 126.8, 126.1, 124.2, 121.8, 119.0, 80.8, 67.0, 53.4, 50.4, 47.9, 47.5, 44.1, 39.7, 38.0, 35.8, 31.5, 29.6, 29.3, 26.3, 25.7, 21.5, 13.8. **HRMS (ESI)  $m/z$** : Calcd for  $\text{C}_{31}\text{H}_{34}\text{N}_3\text{O}_4^+$   $[\text{M} + \text{H}]^+$ : 512.2544; found: 512.2542.

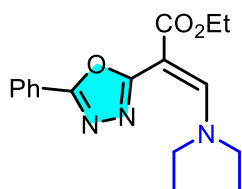

**4o**

**Ethyl (*E*)-3-(diethylamino)-2-(5-phenyl-1,3,4-oxadiazol-2-yl)acrylate**: 37.2 mg, 59% yield. White solid, melting point: 73.5–74.8 °C (Flash column chromatography eluent,

petroleum ether/ethyl acetate = 3/1, V/V). **<sup>1</sup>H NMR** (400 MHz, CDCl<sub>3</sub>) δ 8.11–7.99 (m, 2H), 7.79 (s, 1H), 7.48 (d, *J* = 6.4 Hz, 3H), 4.13 (q, *J* = 7.2 Hz, 2H), 3.45–3.23 (m, 2H), 3.21–2.98 (m, 2H), 1.35–1.20 (m, 3H), 1.15 (t, *J* = 7.2 Hz, 3H), 1.01–0.76 (m, 3H). **<sup>13</sup>C NMR** (100 MHz, CDCl<sub>3</sub>) δ 167.9, 164.8, 162.2, 151.8, 131.4, 128.9, 126.6, 124.2, 80.6, 60.0, 52.6, 43.3, 14.7, 14.4, 11.7. **HRMS (ESI) *m/z***: Calcd for C<sub>17</sub>H<sub>22</sub>N<sub>3</sub>O<sub>3</sub><sup>+</sup> [M + H]<sup>+</sup>: 316.1656; found: 316.1654.

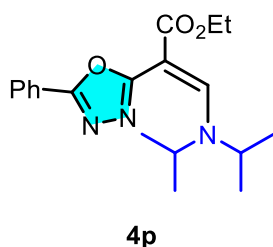

**Ethyl (*E*)-3-di(*iso*-propyl)amino-2-(5-phenyl-1,3,4-oxadiazol-2-yl)acrylate:** 46.0 mg, 67% yield. White solid, melting point: 114.5–116.0 °C (Flash column chromatography eluent, petroleum ether/ethyl acetate = 3/1, V/V). **<sup>1</sup>H NMR** (400 MHz, CDCl<sub>3</sub>) δ 8.10–7.99 (m, 2H), 7.90 (s, 1H), 7.52–7.43 (m, 3H), 4.11 (q, *J* = 7.2 Hz, 2H), 3.73–3.28 (m, 2H), 1.39–1.19 (m, 6H), 1.18–1.12 (m, 4H), 1.11–0.92 (m, 5H). **<sup>13</sup>C NMR** (100 MHz, CDCl<sub>3</sub>) δ 167.9, 164.8, 163.0, 148.7, 131.3, 128.9, 126.6, 124.2, 80.2, 59.9, 50.5, 47.1, 23.8, 19.7, 14.3. **HRMS (ESI) *m/z***: Calcd for C<sub>19</sub>H<sub>26</sub>N<sub>3</sub>O<sub>3</sub><sup>+</sup> [M + H]<sup>+</sup>: 344.1969; found: 344.1966.

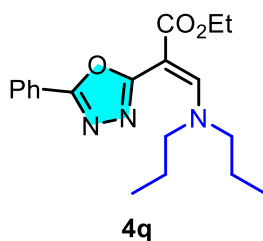

**Ethyl (*E*)-3-(dipropylamino)-2-(5-phenyl-1,3,4-oxadiazol-2-yl)acrylate:** 40.5 mg, 59% yield. Yellow oil (Flash column chromatography eluent, petroleum ether/ethyl acetate = 3/1, V/V). **<sup>1</sup>H NMR** (400 MHz, CDCl<sub>3</sub>) δ 8.14–7.98 (m, 2H), 7.79 (s, 1H), 7.50 (d, *J* = 6.8 Hz, 3H), 4.14 (q, *J* = 7.2 Hz, 2H), 3.36–3.16 (m, 2H), 3.01–2.87 (m, 2H), 1.75–1.54 (m, 2H), 1.42–1.26 (m, 2H), 1.17 (t, *J* = 7.2 Hz, 3H), 1.02–0.85 (m,

3H), 0.67–0.45 (m, 3H).  $^{13}\text{C}$  NMR (100 MHz,  $\text{CDCl}_3$ )  $\delta$  168.0, 164.9, 162.3, 152.4, 131.4, 128.9, 126.7, 124.3, 80.6, 60.4, 60.1, 50.8, 22.5, 19.8, 14.4, 10.8. **HRMS (ESI)**  $m/z$ : Calcd for  $\text{C}_{19}\text{H}_{26}\text{N}_3\text{O}_3^+$   $[\text{M} + \text{H}]^+$ : 344.1969; found: 344.1965.

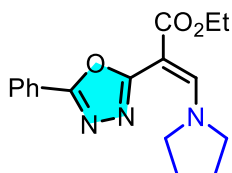

**4r**

**Ethyl (*E*)-2-(5-phenyl-1,3,4-oxadiazol-2-yl)-3-(pyrrolidin-1-yl)acrylate**: 40.1 mg, 64% yield. Yellow solid, melting point: 87.0–88.4 °C (Flash column chromatography eluent, petroleum ether/ethyl acetate = 3/1, V/V).  $^1\text{H}$  NMR (400 MHz,  $\text{CDCl}_3$ )  $\delta$  8.09–8.02 (m, 2H), 7.98 (s, 1H), 7.50–7.45 (m, 3H), 4.15 (q,  $J = 7.2$  Hz, 2H), 3.71–3.52 (m, 2H), 2.98–2.81 (m, 2H), 1.93–1.76 (m, 4H), 1.19 (t,  $J = 7.2$  Hz, 3H).  $^{13}\text{C}$  NMR (100 MHz,  $\text{CDCl}_3$ )  $\delta$  167.5, 164.7, 162.1, 150.3, 131.3, 128.9, 126.6, 124.3, 81.7, 59.9, 54.8, 48.5, 25.8, 24.4, 14.4. **HRMS (ESI)**  $m/z$ : Calcd for  $\text{C}_{17}\text{H}_{20}\text{N}_3\text{O}_3^+$   $[\text{M} + \text{H}]^+$ : 314.1499; found: 314.1496.

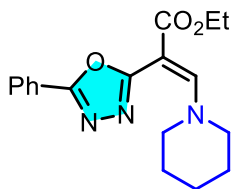

**4s**

**Ethyl (*E*)-2-(5-phenyl-1,3,4-oxadiazol-2-yl)-3-(piperidin-1-yl)acrylate**: 32.1 mg, 49% yield. Yellow solid, melting point: 81.2–82.5 °C (Flash column chromatography eluent, petroleum ether/ethyl acetate = 3/1, V/V).  $^1\text{H}$  NMR (400 MHz,  $\text{CDCl}_3$ )  $\delta$  8.15–7.96 (m, 2H), 7.75 (s, 1H), 7.47 (d,  $J = 6.4$  Hz, 3H), 4.13 (q,  $J = 7.2$  Hz, 2H), 3.66–2.65 (m, 4H), 1.81–1.44 (m, 6H), 1.16 (t,  $J = 7.2$  Hz, 3H).  $^{13}\text{C}$  NMR (100 MHz,  $\text{CDCl}_3$ )  $\delta$  167.8, 164.8, 162.4, 152.9, 131.3, 128.9, 126.6, 124.2, 80.2, 60.0, 56.4, 47.7, 25.8, 25.4, 23.3, 14.3. **HRMS (ESI)**  $m/z$ : Calcd for  $\text{C}_{18}\text{H}_{22}\text{N}_3\text{O}_3^+$   $[\text{M} + \text{H}]^+$ : 328.1656; found: 328.1653.

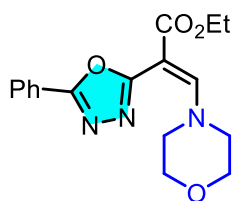

**4t**

**Ethyl (*E*)-3-morpholino-2-(5-phenyl-1,3,4-oxadiazol-2-yl)acrylate:** 44.7 mg, 68% yield. White solid, melting point: 82.6–84.1 °C (Flash column chromatography eluent, petroleum ether/ethyl acetate = 3/1, V/V).  $^1\text{H NMR}$  (400 MHz,  $\text{CDCl}_3$ )  $\delta$  8.03 (d,  $J = 7.2$  Hz, 2H), 7.74 (s, 1H), 7.48 (d,  $J = 7.2$  Hz, 3H), 4.14 (q,  $J = 7.2$  Hz, 2H), 3.73–3.54 (m, 4H), 3.43–3.00 (m, 4H), 1.17 (t,  $J = 7.2$  Hz, 3H).  $^{13}\text{C NMR}$  (100 MHz,  $\text{CDCl}_3$ )  $\delta$  167.3, 164.9, 161.9, 152.8, 131.5, 128.9, 126.6, 123.9, 82.0, 66.0, 60.3, 50.8, 14.3. **HRMS (ESI)  $m/z$ :** Calcd for  $\text{C}_{17}\text{H}_{20}\text{N}_3\text{O}_4^+$  [ $\text{M} + \text{H}$ ] $^+$ : 330.1448; found: 330.1446.

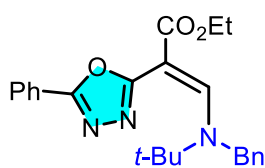

**4u**

**Ethyl (*E*)-3-(benzyl(*tert*-butyl)amino)-2-(5-phenyl-1,3,4-oxadiazol-2-yl)acrylate:** 17.8 mg, 22% yield. Yellow oil (Flash column chromatography eluent, petroleum ether/ethyl acetate = 3/1, V/V).  $^1\text{H NMR}$  (400 MHz,  $\text{CDCl}_3$ )  $\delta$  8.38 (s, 1H), 7.70–7.61 (m, 2H), 7.41 (dt,  $J = 23.6, 7.2$  Hz, 3H), 6.93 (t,  $J = 7.6$  Hz, 2H), 6.83 (t,  $J = 7.2$  Hz, 1H), 6.72 (d,  $J = 7.6$  Hz, 2H), 4.75 (s, 2H), 4.06 (q,  $J = 7.2$  Hz, 2H), 1.48 (s, 9H), 1.08 (t,  $J = 7.2$  Hz, 3H).  $^{13}\text{C NMR}$  (100 MHz,  $\text{CDCl}_3$ )  $\delta$  168.3, 164.5, 161.7, 147.5, 133.5, 130.9, 128.4, 128.1, 126.7, 126.4, 125.5, 124.2, 82.9, 61.3, 60.0, 48.7, 29.0, 14.3. **HRMS (ESI)  $m/z$ :** Calcd for  $\text{C}_{24}\text{H}_{28}\text{N}_3\text{O}_4^+$  [ $\text{M} + \text{H}$ ] $^+$ : 406.2125; found: 406.2126.



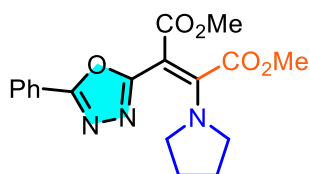

**4w**

**Dimethyl 2-(5-phenyl-1,3,4-oxadiazol-2-yl)-3-(pyrrolidin-1-yl)acrylate:** 32.1 mg, 45% yield. White solid, melting point: 103.8–105.1 °C (Flash column chromatography eluent, petroleum ether/ethyl acetate = 3/1, V/V).  $^1\text{H NMR}$  (400 MHz,  $\text{CDCl}_3$ )  $\delta$  8.03 (d,  $J = 6.4$  Hz, 2H), 7.52–7.41 (m, 3H), 3.91 (s, 3H), 3.57 (s, 3H), 3.46–2.67 (m, 4H), 1.86–1.70 (m, 4H).  $^{13}\text{C NMR}$  (100 MHz,  $\text{CDCl}_3$ )  $\delta$  166.7, 165.0, 164.6, 161.4, 153.9, 131.5, 128.9, 126.6, 123.9, 81.3, 53.0, 51.5, 50.4, 24.9. **HRMS (ESI)  $m/z$ :** Calcd for  $\text{C}_{18}\text{H}_{20}\text{N}_3\text{O}_5^+$   $[\text{M} + \text{H}]^+$ : 358.1397; found: 358.1395.

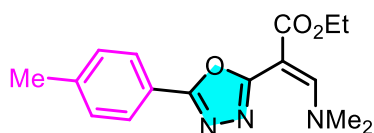

**5a**

**Ethyl (*E*)-3-(dimethylamino)-2-(5-(*p*-tolyl)-1,3,4-oxadiazol-2-yl)acrylate:** 36.1 mg, 60% yield. White solid, melting point: 110.5–113.0 °C (Flash column chromatography eluent, petroleum ether/ethyl acetate = 3/1, V/V).  $^1\text{H NMR}$  (400 MHz,  $\text{CDCl}_3$ )  $\delta$  7.91 (d,  $J = 7.6$  Hz, 2H), 7.75 (s, 1H), 7.25 (d,  $J = 7.6$  Hz, 2H), 4.11 (q,  $J = 6.8$  Hz, 2H), 3.13 (s, 3H), 2.58 (s, 3H), 2.36 (s, 3H), 1.15 (t,  $J = 6.8$  Hz, 3H).  $^{13}\text{C NMR}$  (100 MHz,  $\text{CDCl}_3$ )  $\delta$  167.5, 164.9, 161.5, 153.9, 141.8, 129.5, 126.5, 121.4, 81.4, 59.9, 47.1, 39.3, 21.4, 14.3. **HRMS (ESI)  $m/z$ :** Calcd for  $\text{C}_{16}\text{H}_{20}\text{N}_3\text{O}_3^+$   $[\text{M} + \text{H}]^+$ : 302.1499; found: 302.1497.

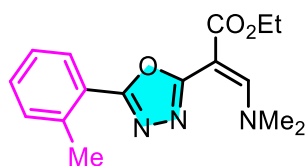

**5b**

**Ethyl (*E*)-3-(dimethylamino)-2-(5-(*o*-tolyl)-1,3,4-oxadiazol-2-yl)acrylate:** 37.3 mg, 62% yield. White solid, melting point: 81.1–82.5 °C (Flash column chromatography eluent, petroleum ether/ethyl acetate = 3/1, V/V). <sup>1</sup>H NMR (400 MHz, CDCl<sub>3</sub>) δ 7.96 (d, *J* = 8.0 Hz, 1H), 7.80 (s, 1H), 7.40–7.35 (m, 1H), 7.34–7.27 (m, 2H), 4.16 (q, *J* = 7.2 Hz, 2H), 3.16 (s, 3H), 2.84–2.50 (m, 6H), 1.19 (t, *J* = 7.2 Hz, 3H). <sup>13</sup>C NMR (100 MHz, CDCl<sub>3</sub>) δ 167.7, 165.3, 161.5, 154.1, 138.1, 131.6, 130.9, 128.9, 126.0, 123.4, 81.5, 60.1, 47.2, 39.7, 22.0, 14.4. **HRMS (ESI) *m/z*:** Calcd for C<sub>16</sub>H<sub>20</sub>N<sub>3</sub>O<sub>3</sub><sup>+</sup> [M + H]<sup>+</sup>: 302.1499; found: 302.1501.

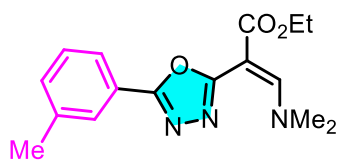

**5c**

**Ethyl (*E*)-3-(dimethylamino)-2-(5-(*m*-tolyl)-1,3,4-oxadiazol-2-yl)acrylate:** 40.9 mg, 68% yield. White solid, melting point: 101.7–103.3 °C (Flash column chromatography eluent, petroleum ether/ethyl acetate = 3/1, V/V). <sup>1</sup>H NMR (400 MHz, CDCl<sub>3</sub>) δ 7.91–7.82 (m, 2H), 7.78 (s, 1H), 7.40–7.28 (m, 2H), 4.15 (q, *J* = 7.2 Hz, 2H), 3.17 (s, 3H), 2.60 (s, 3H), 2.40 (s, 3H), 1.18 (t, *J* = 7.2 Hz, 3H). <sup>13</sup>C NMR (100 MHz, CDCl<sub>3</sub>) δ 167.6, 165.0, 161.8, 154.1, 138.8, 132.2, 128.8, 127.2, 124.1, 123.8, 81.4, 60.1, 47.2, 39.4, 21.2, 14.4. **HRMS (ESI) *m/z*:** Calcd for C<sub>16</sub>H<sub>20</sub>N<sub>3</sub>O<sub>3</sub><sup>+</sup> [M + H]<sup>+</sup>: 302.1499; found: 302.1498.

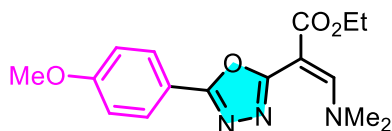

**5d**

**Ethyl (*E*)-3-(dimethylamino)-2-(5-(4-methoxyphenyl)-1,3,4-oxadiazol-2-yl)acrylate:** 37.4 mg, 59% yield. Yellow solid, melting point: 120.2–121.8 °C (Flash column chromatography eluent, petroleum ether/ethyl acetate = 3/1, V/V). <sup>1</sup>H NMR (400 MHz, CDCl<sub>3</sub>) δ 7.99 (d, *J* = 8.8 Hz, 2H), 7.78 (s, 1H), 6.99 (d, *J* = 8.8 Hz, 2H), 4.15 (q, *J* = 7.2 Hz, 2H), 3.86 (s, 3H), 3.13 (s, 3H), 2.63 (s, 3H), 1.19 (t, *J* = 7.2 Hz,

3H).  $^{13}\text{C}$  NMR (100 MHz,  $\text{CDCl}_3$ )  $\delta$  167.8, 164.9, 162.1, 161.5, 154.1, 128.5, 116.9, 114.4, 81.8, 60.1, 55.5, 47.1, 39.6, 14.5. HRMS (ESI)  $m/z$ : Calcd for  $\text{C}_{16}\text{H}_{20}\text{N}_3\text{O}_4^+$   $[\text{M} + \text{H}]^+$ : 318.1448; found: 318.1452.

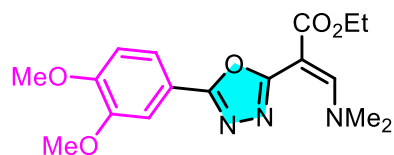

5e

**Ethyl (*E*)-2-(5-(3,4-dimethoxyphenyl)-1,3,4-oxadiazol-2-yl)-3-(dimethylamino)**

**acrylate**: 40.2 mg, 58% yield. Yellow solid, melting point: 115.5–116.7 °C (Flash column chromatography eluent, petroleum ether/ethyl acetate = 3/1, V/V).  $^1\text{H}$  NMR (400 MHz,  $\text{CDCl}_3$ )  $\delta$  7.78 (s, 1H), 7.67–7.53 (m, 2H), 6.94 (d,  $J$  = 8.4 Hz, 1H), 4.15 (q,  $J$  = 6.8 Hz, 2H), 3.94 (d,  $J$  = 6.8 Hz, 6H), 3.16 (s, 3H), 2.63 (s, 3H), 1.19 (t,  $J$  = 6.8 Hz, 3H).  $^{13}\text{C}$  NMR (100 MHz,  $\text{CDCl}_3$ )  $\delta$  167.6, 164.9, 161.5, 154.0, 151.7, 149.2, 120.1, 116.9, 111.0, 109.2, 81.6, 60.0, 56.1, 56.0, 47.2, 39.5, 14.4. HRMS (ESI)  $m/z$ : Calcd for  $\text{C}_{17}\text{H}_{22}\text{N}_3\text{O}_5^+$   $[\text{M} + \text{H}]^+$ : 348.1554; found: 348.1556.

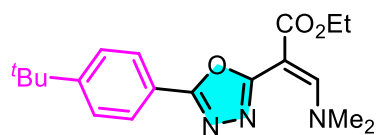

5f

**Ethyl (*E*)-2-(5-(4-(*tert*-butyl)phenyl)-1,3,4-oxadiazol-2-yl)-3-(dimethylamino)**

**acrylate**: 48.7 mg, 71% yield. Yellow oil (Flash column chromatography eluent, petroleum ether/ethyl acetate = 3/1, V/V).  $^1\text{H}$  NMR (400 MHz,  $\text{CDCl}_3$ )  $\delta$  7.98 (d,  $J$  = 8.4 Hz, 2H), 7.77 (s, 1H), 7.49 (d,  $J$  = 8.4 Hz, 2H), 4.14 (q,  $J$  = 7.2 Hz, 2H), 3.15 (s, 3H), 2.60 (s, 3H), 1.32 (s, 9H), 1.17 (t,  $J$  = 7.2 Hz, 3H).  $^{13}\text{C}$  NMR (100 MHz,  $\text{CDCl}_3$ )  $\delta$  167.6, 164.9, 161.6, 154.9, 154.0, 126.5, 125.9, 121.4, 81.5, 60.0, 47.2, 39.3, 34.9, 31.0, 14.3. HRMS (ESI)  $m/z$ : Calcd for  $\text{C}_{19}\text{H}_{26}\text{N}_3\text{O}_3^+$   $[\text{M} + \text{H}]^+$ : 344.1969; found: 344.1969.

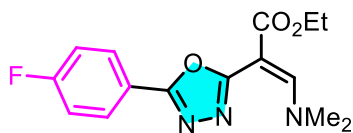

5g

**Ethyl (*E*)-3-(dimethylamino)-2-(5-(4-fluorophenyl)-1,3,4-oxadiazol-2-yl)acrylate:** 44.5 mg, 73% yield. White solid, melting point: 116.2–117.4 °C (Flash column chromatography eluent, petroleum ether/ethyl acetate = 3/1, V/V). <sup>1</sup>H NMR (400 MHz, CDCl<sub>3</sub>) δ 8.05 (s, 2H), 7.79 (s, 1H), 7.17 (t, *J* = 8.0 Hz, 2H), 4.15 (d, *J* = 6.8 Hz, 2H), 3.18 (s, 3H), 2.63 (s, 3H), 1.18 (t, *J* = 6.8 Hz, 3H). <sup>13</sup>C NMR (100 MHz, CDCl<sub>3</sub>) δ 167.5, 164.5 (d, *J* = 251.1 Hz), 164.1, 162.0, 154.1, 128.9 (d, *J* = 8.8 Hz), 120.6 (d, *J* = 3.3 Hz), 116.3, 116.1, 81.4, 60.1, 47.3, 39.6, 14.4. <sup>19</sup>F NMR (376 MHz, CDCl<sub>3</sub>) δ –107.40 ~ –107.45 (m, 1H). **HRMS (ESI) *m/z*:** Calcd for C<sub>16</sub>H<sub>17</sub>FN<sub>3</sub>O<sub>3</sub><sup>+</sup> [M + H]<sup>+</sup>: 306.1248; found: 306.1249.

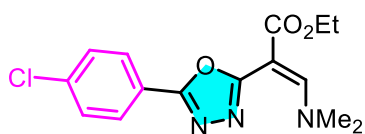

5h

**Ethyl (*E*)-2-(5-(4-chlorophenyl)-1,3,4-oxadiazol-2-yl)-3-(dimethylamino)acrylate:** 41.1 mg, 64% yield. White solid, melting point: 142.7–143.9 °C (Flash column chromatography eluent, petroleum ether/ethyl acetate = 3/1, V/V). <sup>1</sup>H NMR (400 MHz, CDCl<sub>3</sub>) δ 7.99 (d, *J* = 8.4 Hz, 2H), 7.79 (s, 1H), 7.46 (d, *J* = 8.4 Hz, 2H), 4.15 (q, *J* = 7.2 Hz, 2H), 3.19 (s, 3H), 2.62 (s, 3H), 1.18 (t, *J* = 7.2 Hz, 3H). <sup>13</sup>C NMR (100 MHz, CDCl<sub>3</sub>) δ 167.5, 164.0, 162.1, 154.2, 137.6, 129.3, 127.9, 122.8, 81.3, 60.1, 47.4, 39.6, 14.4. **HRMS (ESI) *m/z*:** Calcd for C<sub>15</sub>H<sub>17</sub>ClN<sub>3</sub>O<sub>3</sub><sup>+</sup> [M + H]<sup>+</sup>: 322.0953; found: 322.0952.

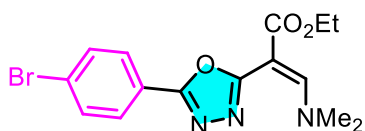

5i

**Ethyl (*E*)-2-(5-(4-bromophenyl)-1,3,4-oxadiazol-2-yl)-3-(dimethylamino)acrylate:** 41.6 mg, 57% yield. White solid, melting point: 142.9–143.7 °C (Flash column chromatography eluent, petroleum ether/ethyl acetate = 3/1, V/V). <sup>1</sup>H NMR (400 MHz, CDCl<sub>3</sub>) δ 7.93 (d, *J* = 8.4 Hz, 2H), 7.80 (s, 1H), 7.63 (d, *J* = 8.4 Hz, 2H), 4.16 (q, *J* = 7.2 Hz, 2H), 3.19 (s, 3H), 2.63 (s, 3H), 1.19 (t, *J* = 7.2 Hz, 3H). <sup>13</sup>C NMR (100 MHz, CDCl<sub>3</sub>) δ 167.5, 164.2, 162.2, 154.2, 132.3, 128.1, 126.0, 123.2, 81.3, 60.1, 47.3, 39.6, 14.4. **HRMS (ESI) *m/z*:** Calcd for C<sub>15</sub>H<sub>17</sub>BrN<sub>3</sub>O<sub>3</sub><sup>+</sup> [M + H]<sup>+</sup>: 366.0448; found: 366.0449.

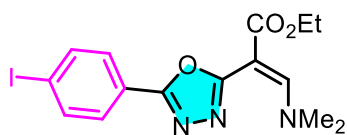

5j

**Ethyl (*E*)-3-(dimethylamino)-2-(5-(4-iodophenyl)-1,3,4-oxadiazol-2-yl)acrylate:** 46.3 mg, 56% yield. White solid, melting point: 128.8–129.9 °C (Flash column chromatography eluent, petroleum ether/ethyl acetate = 3/1, V/V). <sup>1</sup>H NMR (400 MHz, DMSO-*d*<sub>6</sub>) δ 7.97 (d, *J* = 8.4 Hz, 2H), 7.82 (s, 1H), 7.76 (d, *J* = 8.4 Hz, 2H), 4.05 (q, *J* = 7.2 Hz, 2H), 3.37 (s, 3H), 3.21 (s, 3H), 1.12 (t, *J* = 7.2 Hz, 3H). <sup>13</sup>C NMR (100 MHz, DMSO-*d*<sub>6</sub>) δ 166.1, 163.1, 161.6, 153.7, 137.9, 127.5, 122.7, 98.8, 78.9, 58.8, 46.3, 14.0. **HRMS (ESI) *m/z*:** Calcd for C<sub>15</sub>H<sub>17</sub>IN<sub>3</sub>O<sub>3</sub><sup>+</sup> [M + H]<sup>+</sup>: 414.0309; found: 414.0309.

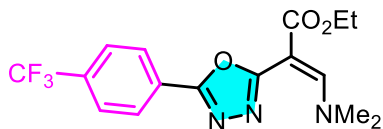

5k

**Ethyl (*E*)-3-(dimethylamino)-2-(5-(4-(trifluoromethyl)phenyl)-1,3,4-oxadiazol-2-yl)acrylate:** 44.0 mg, 62% yield. White solid, melting point: 117.7–119.8 °C (Flash column chromatography eluent, petroleum ether/ethyl acetate = 3/1, V/V). <sup>1</sup>H NMR (400 MHz, CDCl<sub>3</sub>) δ 8.19 (d, *J* = 8.0 Hz, 2H), 7.82 (s, 1H), 7.75 (d, *J* = 8.0 Hz, 2H), 4.17 (q, *J* = 7.2 Hz, 2H), 3.21 (s, 3H), 2.65 (s, 3H), 1.20 (t, *J* = 7.2 Hz, 3H). <sup>13</sup>C

**NMR** (100 MHz, CDCl<sub>3</sub>)  $\delta$  167.4, 163.7, 162.6, 132.9 (q,  $J = 32.6$  Hz), 127.5, 127.0, 126.0 (q,  $J = 3.6$  Hz), 125.0, 122.2, 81.3, 60.2, 47.3, 39.8, 14.4. **<sup>19</sup>F NMR** (377 MHz, CDCl<sub>3</sub>)  $\delta$  -63.05 (s, 3F). **HRMS (ESI)  $m/z$** : Calcd for C<sub>16</sub>H<sub>17</sub>FN<sub>3</sub>O<sub>3</sub><sup>+</sup> [M + H]<sup>+</sup>: 356.1217; found: 356.1217.

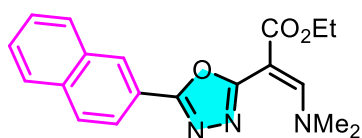

5l

**Ethyl (*E*)-3-(dimethylamino)-2-(5-(naphthalen-2-yl)-1,3,4-oxadiazol-2-yl)acrylate**: 38.4 mg, 57% yield. Yellow solid, melting point: 98.6–99.9 °C (Flash column chromatography eluent, petroleum ether/ethyl acetate = 3/1, V/V). **<sup>1</sup>H NMR** (400 MHz, CDCl<sub>3</sub>)  $\delta$  9.25 (d,  $J = 8.4$  Hz, 1H), 8.21 (d,  $J = 7.2$  Hz, 1H), 8.01 (d,  $J = 8.0$  Hz, 1H), 7.91 (d,  $J = 8.0$  Hz, 1H), 7.84 (s, 1H), 7.66 (t,  $J = 7.6$  Hz, 1H), 7.61–7.52 (m, 2H), 4.21 (q,  $J = 7.2$  Hz, 2H), 3.16 (s, 3H), 2.71 (s, 3H), 1.24 (t,  $J = 7.2$  Hz, 3H). **<sup>13</sup>C NMR** (100 MHz, CDCl<sub>3</sub>)  $\delta$  167.7, 165.1, 161.6, 154.2, 133.8, 132.2, 130.0, 128.6, 128.2, 127.9, 126.5, 126.2, 124.9, 120.9, 81.5, 60.1, 47.3, 39.7, 14.5. **HRMS (ESI)  $m/z$** : Calcd for C<sub>19</sub>H<sub>20</sub>N<sub>3</sub>O<sub>3</sub><sup>+</sup> [M + H]<sup>+</sup>: 338.1499; found: 338.1500.

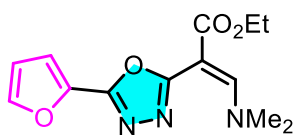

5m

**Ethyl (*E*)-3-(dimethylamino)-2-(5-(furan-2-yl)-1,3,4-oxadiazol-2-yl)acrylate**: 27.7 mg, 50% yield. Yellow solid, melting point: 70.6–71.8 °C (Flash column chromatography eluent, petroleum ether/ethyl acetate = 3/1, V/V). **<sup>1</sup>H NMR** (400 MHz, CDCl<sub>3</sub>)  $\delta$  7.77 (s, 1H), 7.61 (s, 1H), 7.11 (d,  $J = 3.2$  Hz, 1H), 6.61–6.52 (m, 1H), 4.14 (q,  $J = 7.2$  Hz, 2H), 3.16 (s, 3H), 2.62 (s, 3H), 1.18 (t,  $J = 7.2$  Hz, 3H). **<sup>13</sup>C NMR** (100 MHz, CDCl<sub>3</sub>)  $\delta$  167.4, 161.4, 157.8, 154.3, 145.3, 139.8, 113.5, 112.0, 81.0, 60.1, 47.3, 39.5, 14.3. **HRMS (ESI)  $m/z$** : Calcd for C<sub>13</sub>H<sub>16</sub>N<sub>3</sub>O<sub>4</sub><sup>+</sup> [M + H]<sup>+</sup>: 278.1135;

found: 278.1139.

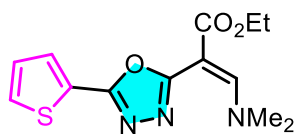

5n

**Ethyl (E)-3-(dimethylamino)-2-(5-(thiophen-2-yl)-1,3,4-oxadiazol-2-yl)acrylate:** 32.2 mg, 55% yield. Yellow solid, melting point: 70.4–71.7 °C (Flash column chromatography eluent, petroleum ether/ethyl acetate = 3/1, V/V). <sup>1</sup>H NMR (400 MHz, CDCl<sub>3</sub>) δ 7.78 (s, 1H), 7.73 (d, *J* = 3.2 Hz, 1H), 7.52 (d, *J* = 4.8 Hz, 1H), 7.16–7.12 (m, 1H), 4.15 (q, *J* = 7.2 Hz, 2H), 3.17 (s, 3H), 2.64 (s, 3H), 1.19 (t, *J* = 7.2 Hz, 3H). <sup>13</sup>C NMR (100 MHz, CDCl<sub>3</sub>) δ 167.5, 161.4, 161.2, 154.2, 129.7, 129.3, 128.0, 125.7, 81.2, 60.1, 47.2, 39.4, 14.4. **HRMS (ESI) *m/z*:** Calcd for C<sub>13</sub>H<sub>16</sub>N<sub>3</sub>O<sub>3</sub>S<sup>+</sup> [M + H]<sup>+</sup>: 294.0907; found: 294.0910.

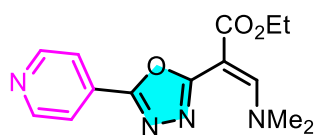

5o

**Ethyl (E)-3-(dimethylamino)-2-(5-(pyridin-4-yl)-1,3,4-oxadiazol-2-yl)acrylate:** 39.7 mg, 69% yield. Yellow solid, melting point: 102.4–103.8 °C (Flash column chromatography eluent, petroleum ether/ethyl acetate = 3/1, V/V). <sup>1</sup>H NMR (400 MHz, CDCl<sub>3</sub>) δ 8.76 (d, *J* = 1.2 Hz, 2H), 7.89 (d, *J* = 5.2 Hz, 2H), 7.81 (s, 1H), 4.14 (q, *J* = 7.2 Hz, 2H), 3.19 (s, 3H), 2.62 (s, 3H), 1.18 (t, *J* = 7.2 Hz, 3H). <sup>13</sup>C NMR (100 MHz, CDCl<sub>3</sub>) δ 167.2, 163.0, 162.9, 154.5, 150.7, 131.3, 120.1, 81.0, 60.2, 47.3, 39.6, 14.4. **HRMS (ESI) *m/z*:** Calcd for C<sub>14</sub>H<sub>17</sub>N<sub>4</sub>O<sub>3</sub><sup>+</sup> [M + H]<sup>+</sup>: 289.1295; found: 289.1297.

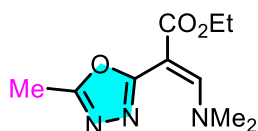

5p

**Ethyl (*E*)-3-(dimethylamino)-2-(5-methyl-1,3,4-oxadiazol-2-yl)acrylate:** 22.5 mg, 50% yield. Yellow oil (Flash column chromatography eluent, petroleum ether/ethyl acetate = 3/1, V/V).  $^1\text{H NMR}$  (400 MHz,  $\text{CDCl}_3$ )  $\delta$  7.73 (s, 1H), 4.18–4.09 (m, 2H), 3.09 (s, 3H), 2.72–2.42 (m, 6H), 1.21–1.57 (m, 3H).  $^{13}\text{C NMR}$  (100 MHz,  $\text{CDCl}_3$ )  $\delta$  167.6, 164.1, 162.1, 153.9, 81.5, 60.1, 47.2, 39.2, 14.4, 11.2. **HRMS (ESI) *m/z*:** Calcd for  $\text{C}_{10}\text{H}_{16}\text{N}_3\text{O}_3^+$  [ $\text{M} + \text{H}$ ] $^+$ : 226.1186; found: 226.1189.

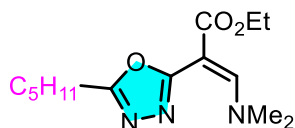

5q

**Ethyl (*E*)-3-(dimethylamino)-2-(5-pentyl-1,3,4-oxadiazol-2-yl)acrylate:** 38.2 mg, 68% yield. Yellow oil (Flash column chromatography eluent, petroleum ether/ethyl acetate = 3/1, V/V).  $^1\text{H NMR}$  (400 MHz,  $\text{CDCl}_3$ )  $\delta$  7.67 (s, 1H), 4.07 (q,  $J = 7.2$  Hz, 2H), 3.07 (s, 3H), 2.78 (t,  $J = 7.6$  Hz, 2H), 2.52 (s, 3H), 1.80–1.65 (m, 2H), 1.31–1.26 (m, 4H), 1.12 (t,  $J = 7.2$  Hz, 3H), 0.83 (t,  $J = 6.8$  Hz, 3H).  $^{13}\text{C NMR}$  (100 MHz,  $\text{CDCl}_3$ )  $\delta$  167.5, 167.3, 161.7, 153.7, 81.5, 59.8, 46.9, 39.0, 30.8, 26.1, 25.3, 22.0, 14.2, 13.7. **HRMS (ESI) *m/z*:** Calcd for  $\text{C}_{14}\text{H}_{24}\text{N}_3\text{O}_3^+$  [ $\text{M} + \text{H}$ ] $^+$ : 282.1812; found: 282.1815.

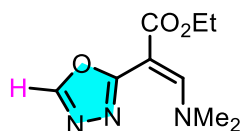

5r

**Ethyl (*E*)-3-(dimethylamino)-2-(1,3,4-oxadiazol-2-yl)acrylate:** 32.6 mg, 70% yield. Yellow oil (Flash column chromatography eluent, petroleum ether/ethyl acetate = 3/1, V/V).  $^1\text{H NMR}$  (400 MHz,  $\text{CDCl}_3$ )  $\delta$  8.43 (s, 1H), 7.75 (s, 1H), 4.10 (q,  $J = 7.2$  Hz,



2H), 3.14 (s, 3H), 2.50 (s, 3H), 1.15 (t,  $J = 7.2$  Hz, 3H).  $^{13}\text{C}$  NMR (100 MHz,  $\text{CDCl}_3$ )  $\delta$  167.3, 162.1, 154.2, 153.3, 80.7, 60.0, 47.1, 39.2, 14.3. **HRMS (ESI)  $m/z$** : Calcd for  $\text{C}_9\text{H}_{14}\text{N}_3\text{O}_3^+$  [ $\text{M} + \text{Na}$ ] $^+$ : 234.0849; found: 234.0849.

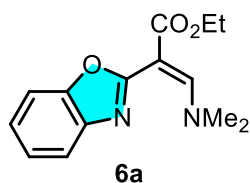

**Ethyl (*E*)-2-(benzo[*d*]oxazol-2-yl)-3-(dimethylamino)acrylate**: 29.1 mg, 56% yield. Yellow solid, melting point: 102.2–103.4 °C (Flash column chromatography eluent, petroleum ether/ethyl acetate = 3/1, V/V).  $^1\text{H}$  NMR (400 MHz,  $\text{CDCl}_3$ )  $\delta$  7.78 (s, 1H), 7.73–7.67 (m, 1H), 7.54–7.48 (m, 1H), 7.34–7.28 (m, 2H), 4.16 (q,  $J = 7.2$  Hz, 2H), 3.10 (s, 3H), 2.58 (s, 3H), 1.19 (t,  $J = 7.2$  Hz, 3H).  $^{13}\text{C}$  NMR (100 MHz,  $\text{CDCl}_3$ )  $\delta$  167.9, 161.1, 154.1, 150.7, 141.4, 124.5, 123.8, 119.7, 110.5, 86.2, 60.0, 47.1, 39.5, 14.4. **HRMS (ESI)  $m/z$** : Calcd for  $\text{C}_{14}\text{H}_{17}\text{N}_2\text{O}_3^+$  [ $\text{M} + \text{H}$ ] $^+$ : 261.1234; found: 261.1233.

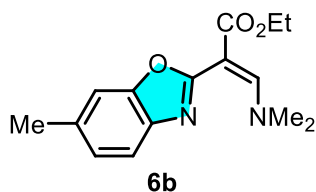

**Ethyl (*E*)-3-(dimethylamino)-2-(6-methylbenzo[*d*]oxazol-2-yl)acrylate**: 21.9 mg, 40% yield. Yellow oil (Flash column chromatography eluent, petroleum ether/ethyl acetate = 3/1, V/V).  $^1\text{H}$  NMR (400 MHz,  $\text{CDCl}_3$ )  $\delta$  7.74 (s, 1H), 7.55 (d,  $J = 8.0$  Hz, 1H), 7.30 (s, 1H), 7.09 (d,  $J = 8.0$  Hz, 1H), 4.14 (q,  $J = 6.8$  Hz, 2H), 3.07 (s, 3H), 2.45 (s, 6H), 1.16 (t,  $J = 6.8$  Hz, 3H).  $^{13}\text{C}$  NMR (100 MHz,  $\text{CDCl}_3$ )  $\delta$  168.0, 160.4, 153.9, 150.9, 139.1, 134.8, 125.0, 119.0, 110.6, 86.1, 59.9, 46.8, 39.2, 21.6, 14.3. **HRMS (ESI)  $m/z$** : Calcd for  $\text{C}_{15}\text{H}_{19}\text{N}_2\text{O}_3^+$  [ $\text{M} + \text{H}$ ] $^+$ : 275.1390; found: 275.1388.

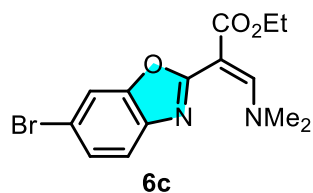

**Ethyl (*E*)-2-(6-bromobenzo[d]oxazol-2-yl)-3-(dimethylamino)acrylate:** 44.6 mg, 66% yield. White solid, melting point: 76.9–78.3 °C (Flash column chromatography eluent, petroleum ether/ethyl acetate = 3/1, V/V).  $^1\text{H NMR}$  (400 MHz,  $\text{CDCl}_3$ )  $\delta$  7.77 (s, 1H), 7.66 (s, 1H), 7.53 (d,  $J = 8.4$  Hz, 1H), 7.40 (d,  $J = 8.4$  Hz, 1H), 4.14 (q,  $J = 7.2$  Hz, 2H), 3.10 (s, 3H), 2.55 (s, 3H), 1.17 (t,  $J = 7.2$  Hz, 3H).  $^{13}\text{C NMR}$  (100 MHz,  $\text{CDCl}_3$ )  $\delta$  167.6, 161.6, 154.3, 151.1, 140.5, 127.2, 120.5, 117.3, 113.8, 85.6, 60.0, 47.0, 39.6, 14.3. **HRMS (ESI)  $m/z$ :** Calcd for  $\text{C}_{14}\text{H}_{16}\text{BrN}_2\text{O}_3^+$  [ $\text{M} + \text{H}$ ] $^+$ : 339.0339; found: 339.0338.

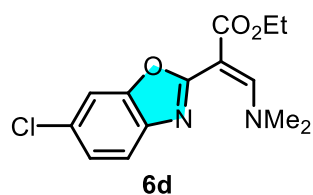

**Ethyl (*E*)-2-(6-chlorobenzo[d]oxazol-2-yl)-3-(dimethylamino)acrylate:** 18.2 mg, 31% yield. Yellow oil (Flash column chromatography eluent, petroleum ether/ethyl acetate = 3/1, V/V).  $^1\text{H NMR}$  (400 MHz,  $\text{CDCl}_3$ )  $\delta$  7.79 (s, 1H), 7.60 (d,  $J = 8.4$  Hz, 1H), 7.53 (s, 1H), 7.29 (d,  $J = 8.4$  Hz, 1H), 4.18 (q,  $J = 7.2$  Hz, 2H), 3.13 (s, 3H), 2.58 (s, 3H), 1.21 (t,  $J = 7.2$  Hz, 3H).  $^{13}\text{C NMR}$  (100 MHz,  $\text{CDCl}_3$ )  $\delta$  167.8, 161.9, 154.4, 151.0, 140.2, 130.2, 124.6, 120.2, 111.1, 85.8, 60.2, 47.1, 39.4, 14.4. **HRMS (ESI)  $m/z$ :** Calcd for  $\text{C}_{14}\text{H}_{16}\text{ClN}_2\text{O}_3^+$  [ $\text{M} + \text{H}$ ] $^+$ : 295.0844; found: 295.0842.

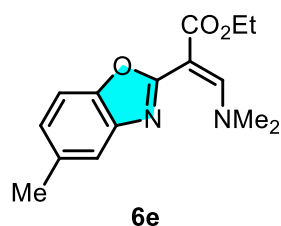

**Ethyl (*E*)-3-(dimethylamino)-2-(5-methylbenzo[d]oxazol-2-yl)acrylate:** 24.5 mg, 45% yield. Yellow oil (Flash column chromatography eluent, petroleum ether/ethyl

acetate = 3/1, V/V). **<sup>1</sup>H NMR** (400 MHz, CDCl<sub>3</sub>) δ 7.74 (s, 1H), 7.61–7.25 (m, 2H), 7.09 (s, 1H), 4.48–3.82 (m, 2H), 3.09 (s, 3H), 2.43 (s, 6H), 1.41–0.98 (m, 3H). **<sup>13</sup>C NMR** (100 MHz, CDCl<sub>3</sub>) δ 168.0, 161.0, 153.9, 148.9, 141.5, 133.6, 125.5, 119.6, 109.8, 86.2, 60.0, 46.8, 39.3, 21.3, 14.3. **HRMS (ESI) *m/z***: Calcd for C<sub>15</sub>H<sub>19</sub>N<sub>2</sub>O<sub>3</sub><sup>+</sup> [M + H]<sup>+</sup>: 275.1390; found: 275.1387.

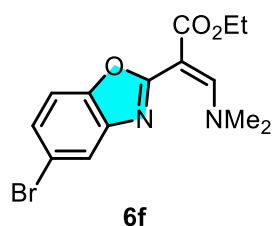

**Ethyl (*E*)-2-(5-bromobenzo[d]oxazol-2-yl)-3-(dimethylamino)acrylate**: 22.3 mg, 33% yield. White solid, melting point: 77.0–78.6 °C (Flash column chromatography eluent, petroleum ether/ethyl acetate = 3/1, V/V). **<sup>1</sup>H NMR** (400 MHz, CDCl<sub>3</sub>) δ 7.79 (d, *J* = 12.8 Hz, 2H), 7.38 (s, 2H), 4.16 (q, *J* = 6.8 Hz, 2H), 3.14 (s, 3H), 2.57 (s, 3H), 1.19 (t, *J* = 6.8 Hz, 3H). **<sup>13</sup>C NMR** (100 MHz, CDCl<sub>3</sub>) δ 167.7, 162.4, 154.4, 149.7, 143.0, 127.4, 122.5, 116.6, 111.7, 85.8, 60.1, 47.1, 39.5, 14.4. **HRMS (ESI) *m/z***: Calcd for C<sub>14</sub>H<sub>16</sub>BrN<sub>2</sub>O<sub>3</sub><sup>+</sup> [M + H]<sup>+</sup>: 339.0339; found: 339.0338.

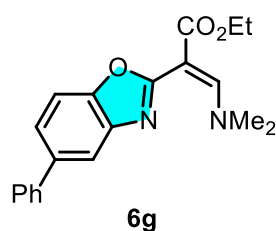

**Ethyl (*E*)-3-(dimethylamino)-2-(5-phenylbenzo[d]oxazol-2-yl)acrylate**: 28.9 mg, 43% yield. Yellow solid, melting point: 107.5–109.0 °C (Flash column chromatography eluent, petroleum ether/ethyl acetate = 3/1, V/V). **<sup>1</sup>H NMR** (400 MHz, CDCl<sub>3</sub>) δ 7.90 (s, 1H), 7.81 (s, 1H), 7.61 (d, *J* = 7.6 Hz, 2H), 7.55 (d, *J* = 8.8 Hz, 1H), 7.45 (t, *J* = 7.6 Hz, 2H), 7.35 (t, *J* = 7.2 Hz, 1H), 4.19 (q, *J* = 7.2 Hz, 2H), 3.12 (s, 3H), 2.61 (s, 3H), 1.22 (t, *J* = 7.2 Hz, 3H). **<sup>13</sup>C NMR** (100 MHz, CDCl<sub>3</sub>) δ 167.9, 161.7, 154.2, 150.3, 142.0, 141.1, 137.8, 128.7, 127.3, 127.0, 124.0, 118.1,

110.4, 86.1, 60.1, 46.7, 39.6, 14.4. **HRMS (ESI)  $m/z$** : Calcd for  $C_{20}H_{21}N_2O_3^+$  [ $M + H$ ]<sup>+</sup>: 337.1547; found: 337.1543.

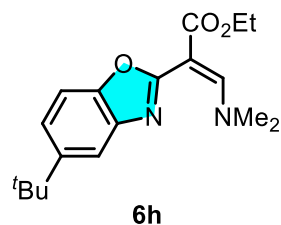

**Ethyl (E)-2-(5-(tert-butyl)benzo[d]oxazol-2-yl)-3-(dimethylamino)acrylate**: 31.6 mg, 50% yield. Yellow oil (Flash column chromatography eluent, petroleum ether/ethyl acetate = 3/1, V/V). **<sup>1</sup>H NMR** (400 MHz,  $CDCl_3$ )  $\delta$  7.77–7.70 (m, 1H), 7.67 (d,  $J = 7.2$  Hz, 1H), 7.44–7.28 (m, 2H), 4.11 (q,  $J = 6.8$  Hz, 2H), 3.05 (s, 3H), 2.54 (s, 3H), 1.33 (s, 9H), 1.19–1.08 (m, 3H). **<sup>13</sup>C NMR** (100 MHz,  $CDCl_3$ )  $\delta$  167.8, 160.9, 153.8, 148.5, 147.1, 141.1, 122.0, 116.0, 109.4, 86.1, 59.8, 46.7, 39.1, 34.6, 31.5, 14.3. **HRMS (ESI)  $m/z$** : Calcd for  $C_{18}H_{25}N_2O_3^+$  [ $M + H$ ]<sup>+</sup>: 317.1860; found: 317.1858.

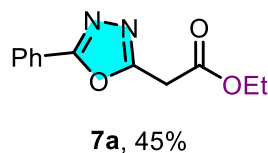

Under nitrogen atmosphere, a 10 mL Schlenk tube equipped with a magnetic stir bar was charged with enaminone (**1a**, 28.6 mg, 0.20 mmol), benzoyl hydrazine (**2a**, 27.2 mg, 0.20 mmol),  $[Ir(dF(CF_3)ppy)_2(dtbbpy)]PF_6$  (4.48 mg, 0.004 mmol, 2.0 mol%), difluoro-dibromomethane (**3**, 0.60 mmol, prepare 1.0 mg/mL DMA solution of difluoro-dibromomethane and measure 140  $\mu$ L with a microsyringe), and DMA (2.0 mL). The reaction mixture was stirred under 2 $\times$ 3 W blue LEDs (450–455 nm) at room temperature with stirring for 2 h. After completion of the reaction, added  $H_2O$  (0.5 mL), then the reaction mixture was stirred at room temperature with stirring for another 12 h. After completion of the reaction, the reaction mixture was diluted with ethyl acetate and  $H_2O$ . The resulting mixture was extracted with ethyl acetate, and the combined organic layers were washed with brine, dried over  $Na_2SO_4$ , filtered and

concentrated. The residue was purified with silica gel chromatography (petroleum ether/ethyl acetate = 30:1, V/V) to give the product **7a** (20.9 mg, 45% yield).

**Ethyl 2-(5-phenyl-1,3,4-oxadiazol-2-yl)acetate:** 20.9 mg, 45% yield. White solid, melting point: 60.3–61.5 °C (Flash column chromatography eluent, petroleum ether/ethyl acetate = 30/1, V/V). <sup>1</sup>H NMR (400 MHz, CDCl<sub>3</sub>) δ 8.11–7.98 (m, 2H), 7.59–7.46 (m, 3H), 4.24 (q, *J* = 7.2 Hz, 2H), 4.03 (s, 2H), 1.29 (t, *J* = 7.2 Hz, 3H). <sup>13</sup>C NMR (100 MHz, CDCl<sub>3</sub>) δ 166.3, 165.6, 160.3, 131.8, 129.0, 126.9, 123.7, 62.1, 32.0, 14.0. **HRMS (ESI) m/z:** Calcd for C<sub>12</sub>H<sub>13</sub>N<sub>2</sub>O<sub>3</sub> [M + H]<sup>+</sup>: 233.0921; found: 233.0918.

## 5. Unsuccessful substrates

### unsuccessful substrates 1

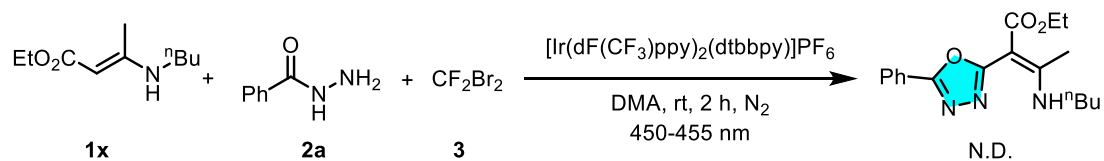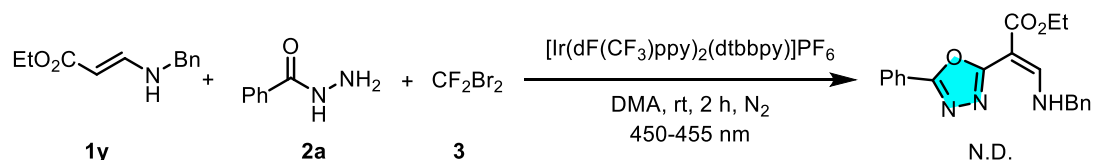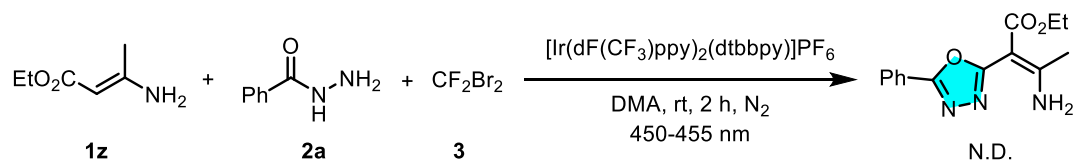

### unsuccessful substrates 2

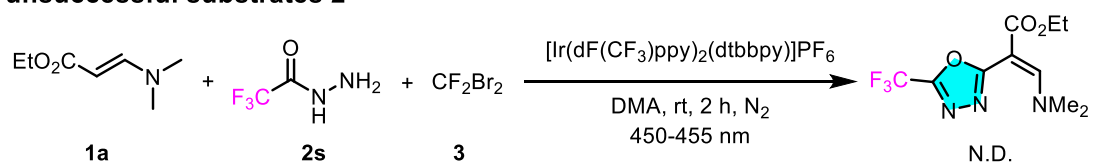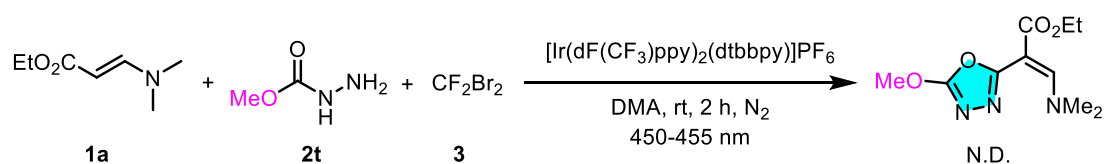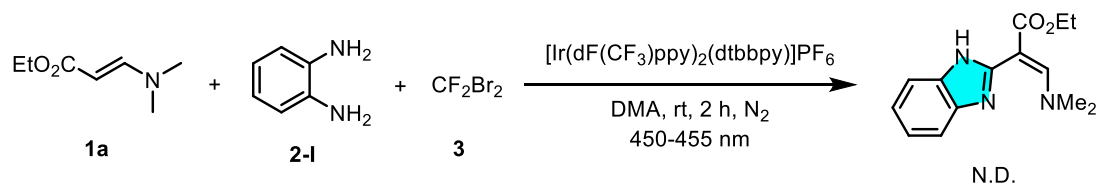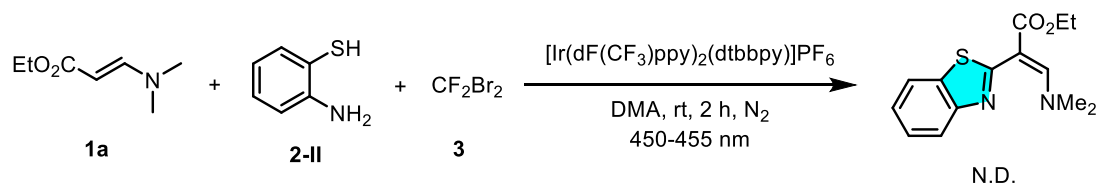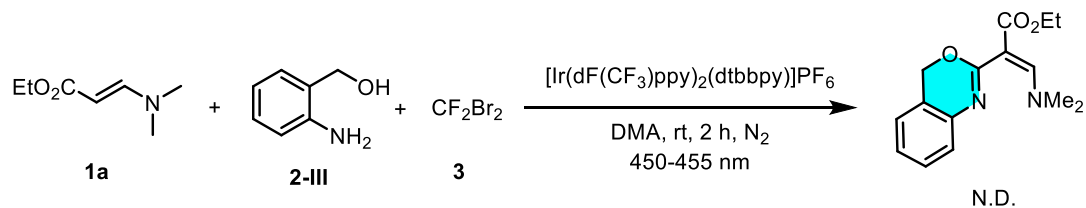

## 6. Crystallographic data and molecular structure of **4a** (CCDC: 2247417)

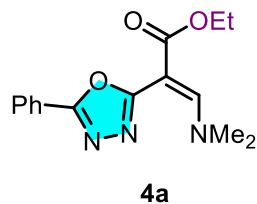

General procedure for crystal culture of **4a**: To a test tube (15 mL) with added **4a** (30 mg), dichloromethane (1.0 mL) was added slowly to make it dissolve completely. After it dissolved, a mixture of petroleum ether (2.0 mL) and EtOAc (3.0 mL) was added. Then, the test tube was sealed with a rubber stopper, and connected to air with a syringe needle. Finally, the tube was put in a dry and ventilated place to make the organic solvent to volatilize slowly. After a few days, the crystal of **4a** was obtained. The X-ray crystal structure of **4a** was shown in Figure S2.

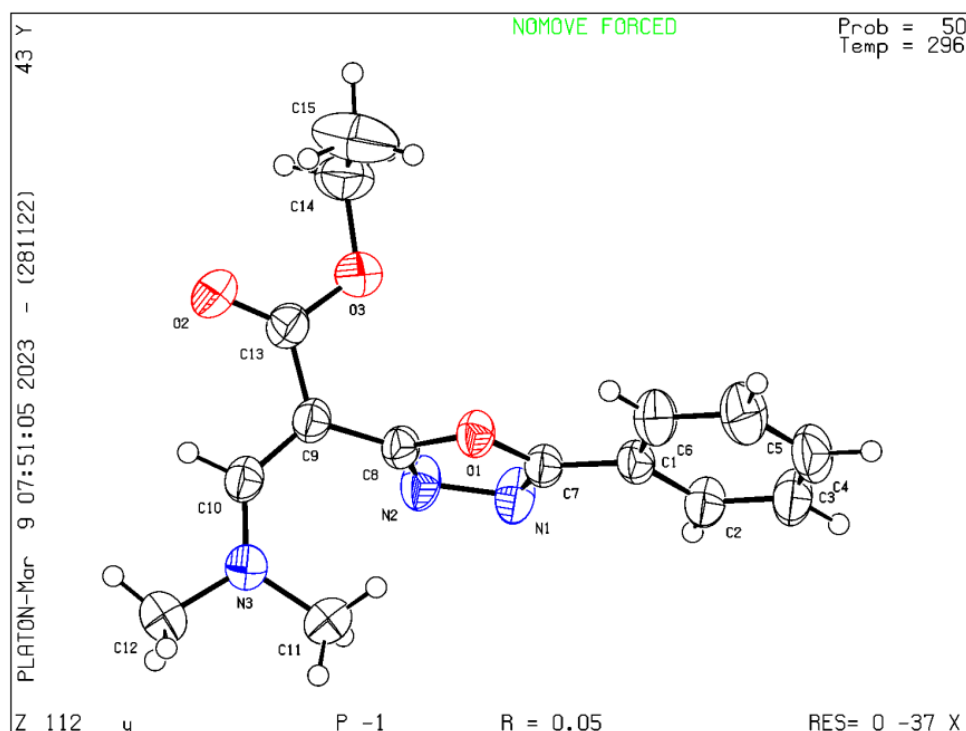

**Figure S2** ORTEP diagram of **4a** with thermal displacement parameters drawn at 30% probability.

## Datablock: y

---

Bond precision: C-C = 0.0021 A

Wavelength=0.71073

Cell: a=6.9139(16) b=10.160(2) c=11.688(3)  
alpha=112.767(3) beta=91.686(3) gamma=91.806(3)  
Temperature: 296 K

|                        | Calculated    | Reported      |
|------------------------|---------------|---------------|
| Volume                 | 755.9(3)      | 755.9(3)      |
| Space group            | P -1          | P -1          |
| Hall group             | -P 1          | -P 1          |
| Moiety formula         | C15 H17 N3 O3 | C15 H17 N3 O3 |
| Sum formula            | C15 H17 N3 O3 | C15 H17 N3 O3 |
| Mr                     | 287.32        | 287.32        |
| Dx, g cm <sup>-3</sup> | 1.262         | 1.262         |
| Z                      | 2             | 2             |
| Mu (mm <sup>-1</sup> ) | 0.090         | 0.090         |
| F000                   | 304.0         | 304.0         |
| F000'                  | 304.14        |               |
| h, k, lmax             | 10, 15, 17    | 10, 14, 16    |
| Nref                   | 5287          | 4688          |
| Tmin, Tmax             | 0.989, 0.991  | 0.665, 0.746  |
| Tmin'                  | 0.988         |               |

Correction method= # Reported T Limits: Tmin=0.665 Tmax=0.746  
AbsCorr = MULTI-SCAN

Data completeness= 0.887

Theta(max)= 32.079

R(reflections)= 0.0493( 3402)

wR2(reflections)=  
0.1679( 4688)

S = 1.045

Npar= 194



## 7. Control experiment

Under nitrogen atmosphere, a 10 mL Schlenk tube equipped with a magnetic stir bar was charged with enaminone (**1a**, 28.6 mg, 0.20 mmol), benzoyl hydrazine (**2a**, 27.2 mg, 0.20 mmol), TEMPO (62.5 mg, 0.40 mmol), [Ir(dF(CF<sub>3</sub>)ppy)<sub>2</sub>(dtbbpy)]PF<sub>6</sub> (4.48 mg, 0.004 mmol, 2.0 mol%), difluoro-dibromomethane (**3**, 0.60 mmol, prepare 1.0 mg/mL DMA solution of difluoro-dibromomethane and measure 140  $\mu$ L with a microsyringe), and DMA (2.0 mL). The reaction mixture was stirred under 2 $\times$ 3 W blue LEDs (450–455 nm) at room temperature with stirring for 2 h. After completion of the reaction, the reaction mixture was detected by GC-MS (Figure S3). The TEMPO-trapped product **8** was observed during the reaction. This result provided the evidence for support of the proposed mechanism.

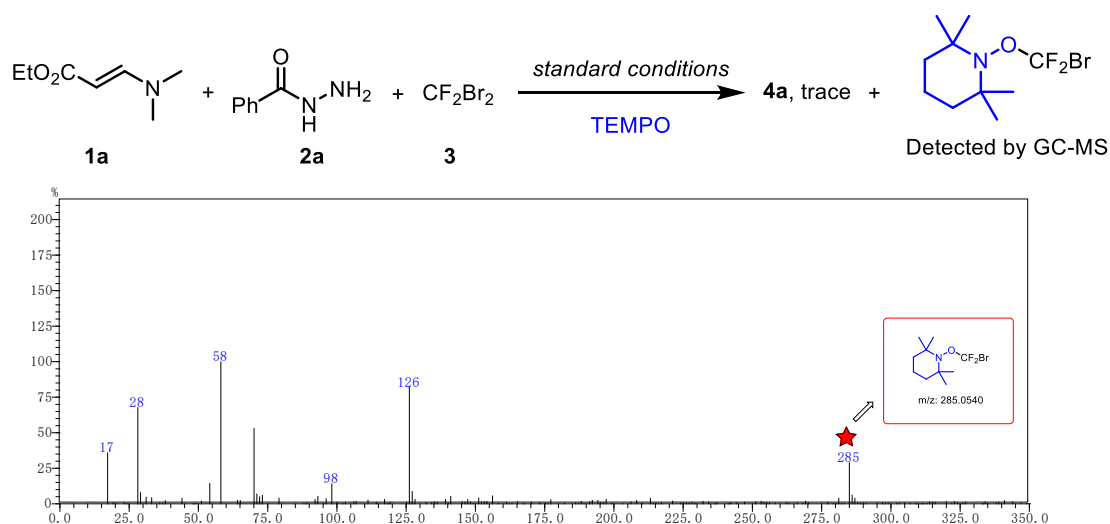

**Figure S3** GC-MS analysis of the reaction mixture.

## 8. $^1\text{H}$ NMR, $^{13}\text{C}$ NMR and $^{19}\text{F}$ NMR spectra of the products

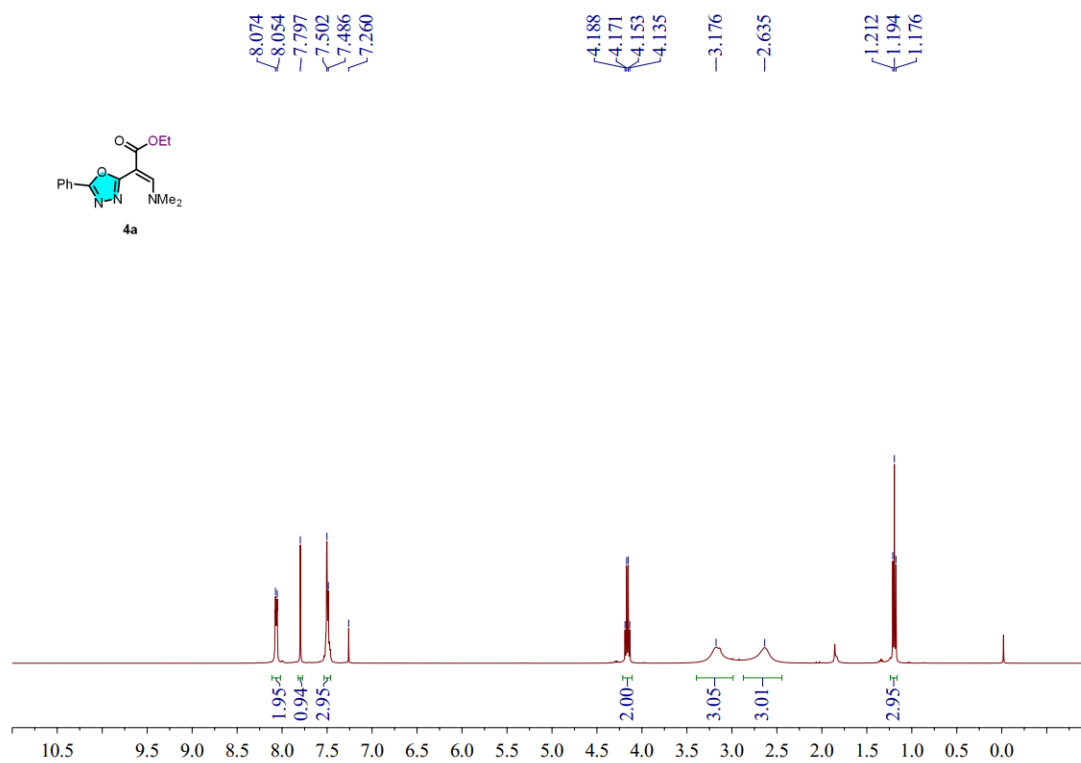

$^1\text{H}$  NMR Spectrum of Compound **4a** (400 MHz,  $\text{CDCl}_3$ )

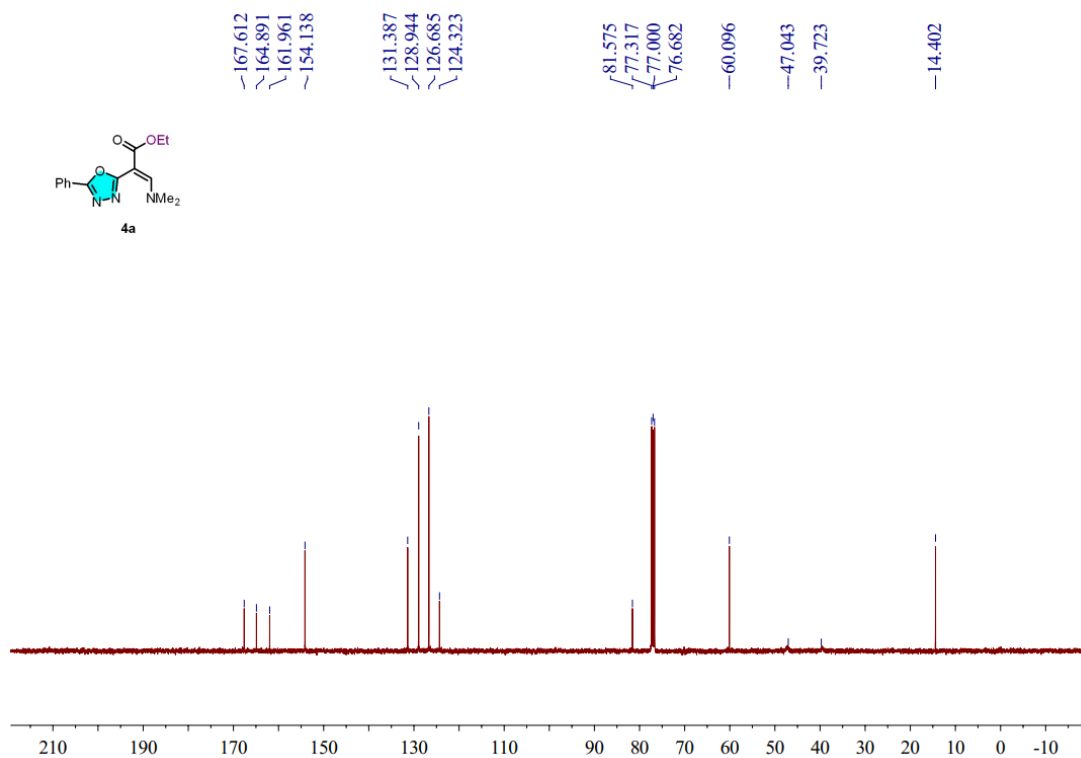

$^{13}\text{C}\{^1\text{H}\}$  NMR Spectrum of Compound **4a** (100 MHz,  $\text{CDCl}_3$ )

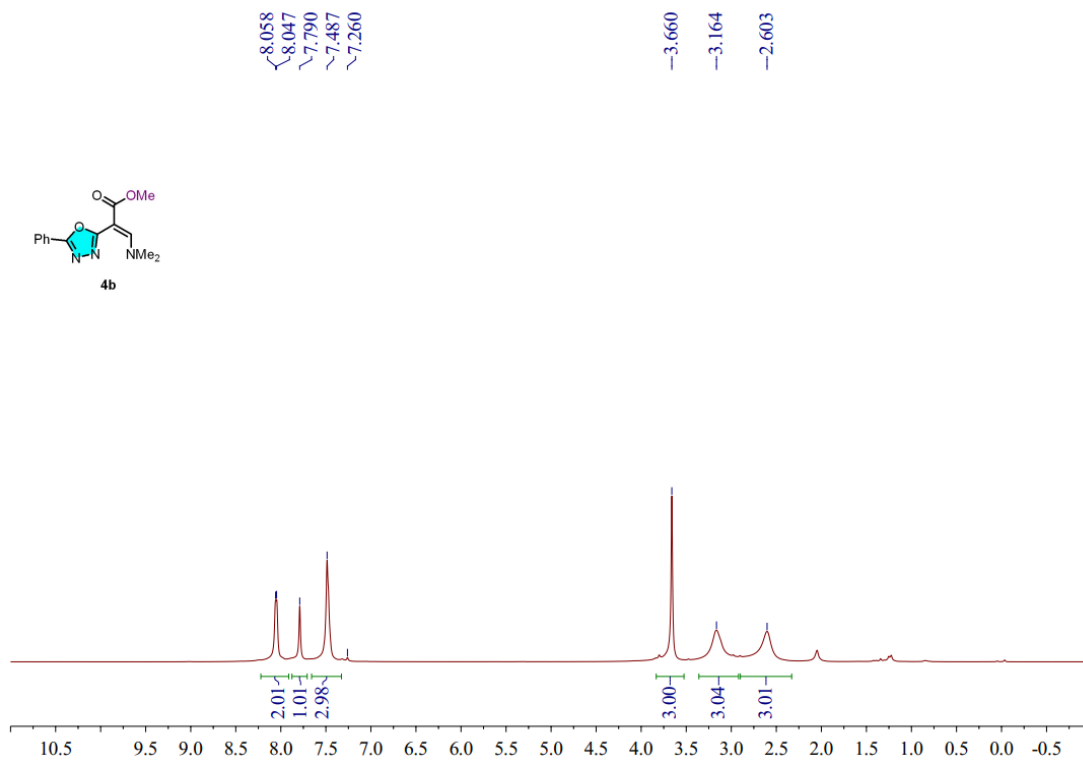

$^1\text{H}$  NMR Spectrum of Compound **4b** (400 MHz,  $\text{CDCl}_3$ )

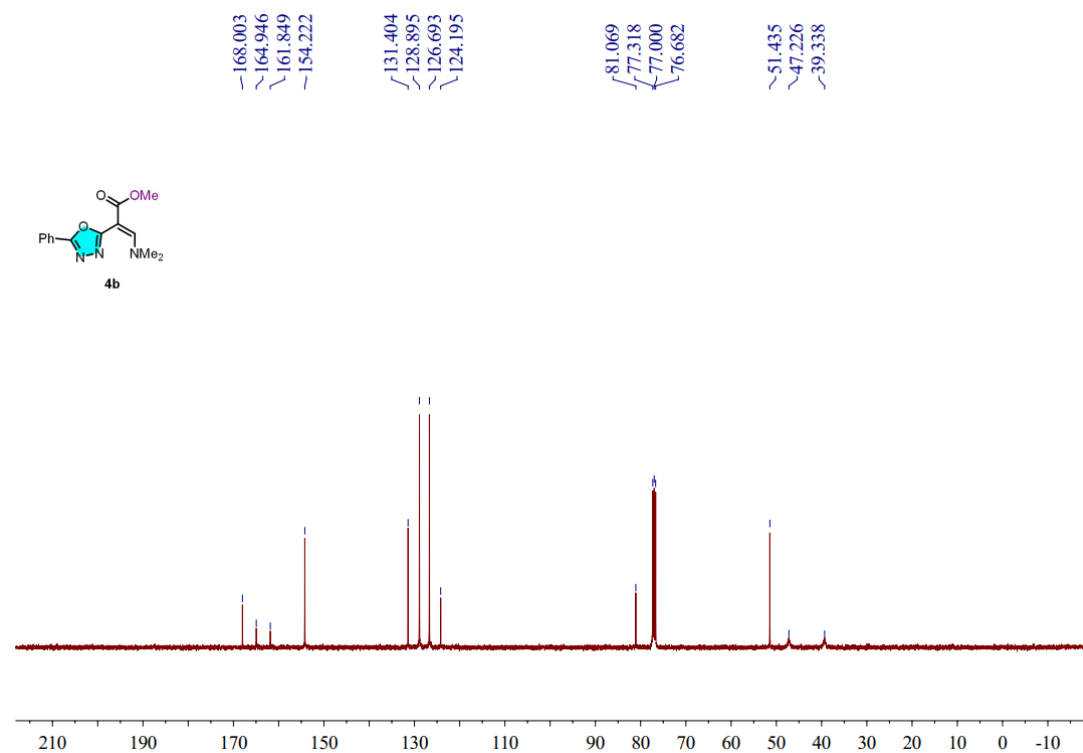

$^{13}\text{C}\{^1\text{H}\}$  NMR Spectrum of Compound **4b** (100 MHz,  $\text{CDCl}_3$ )

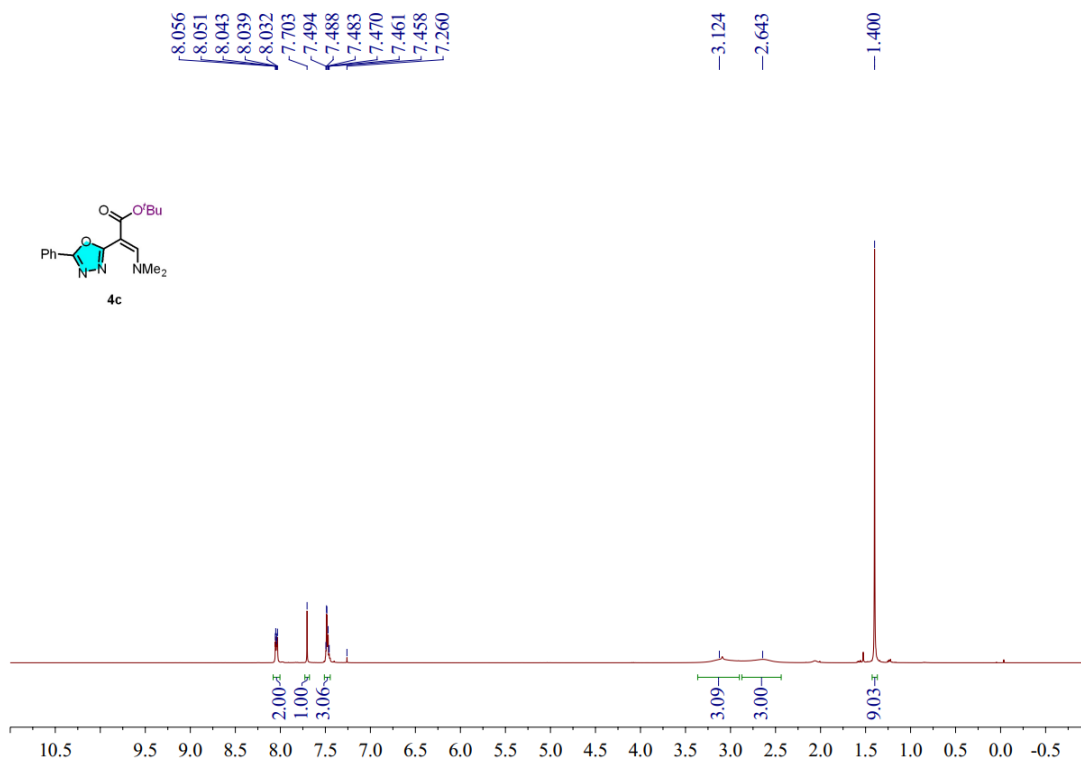

<sup>1</sup>H NMR Spectrum of Compound **4c** (400 MHz, CDCl<sub>3</sub>)

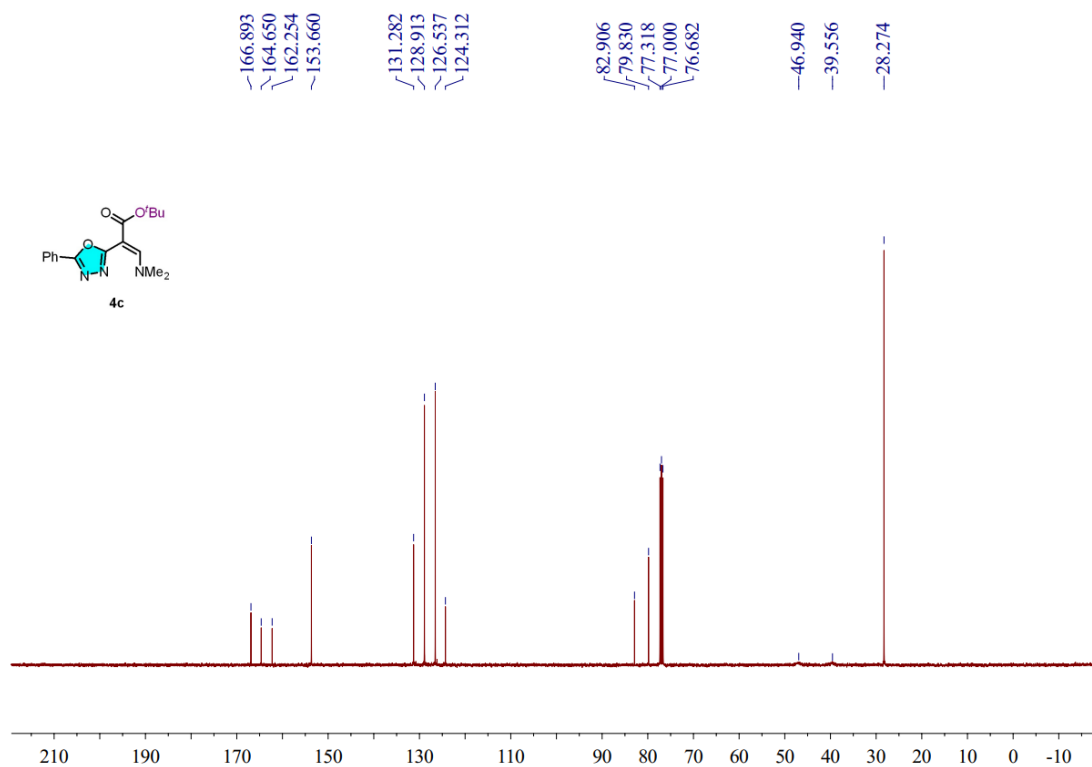

<sup>13</sup>C {<sup>1</sup>H} NMR Spectrum of Compound **4c** (100 MHz, CDCl<sub>3</sub>)

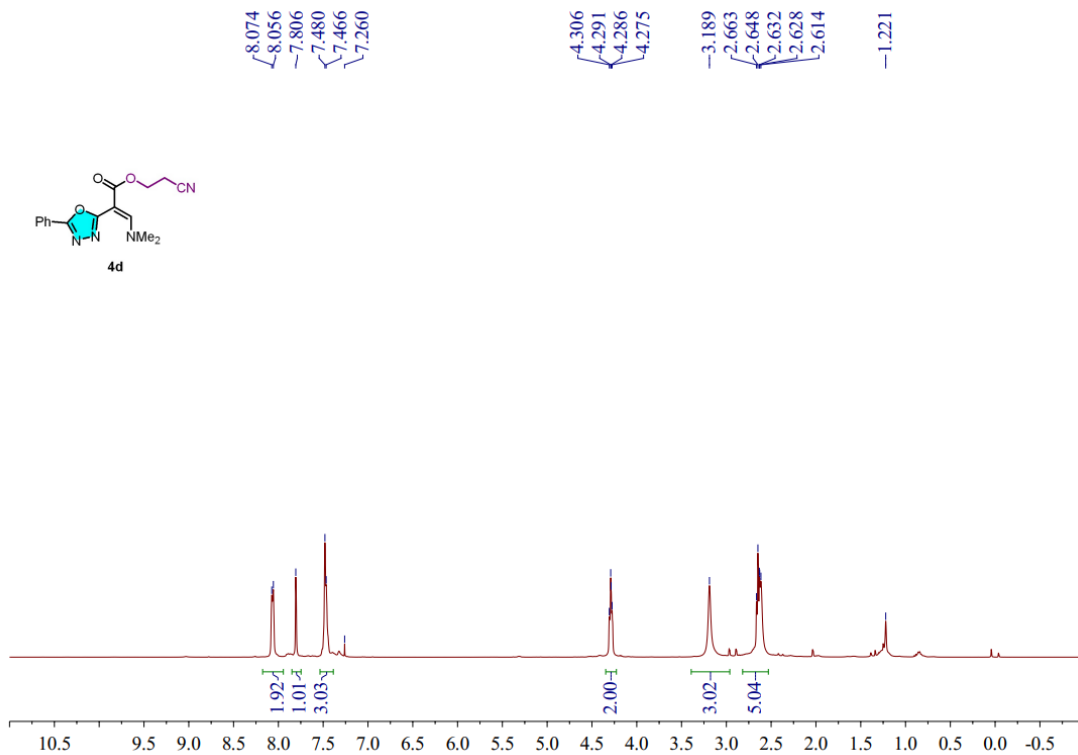

<sup>1</sup>H NMR Spectrum of Compound **4d** (400 MHz, CDCl<sub>3</sub>)

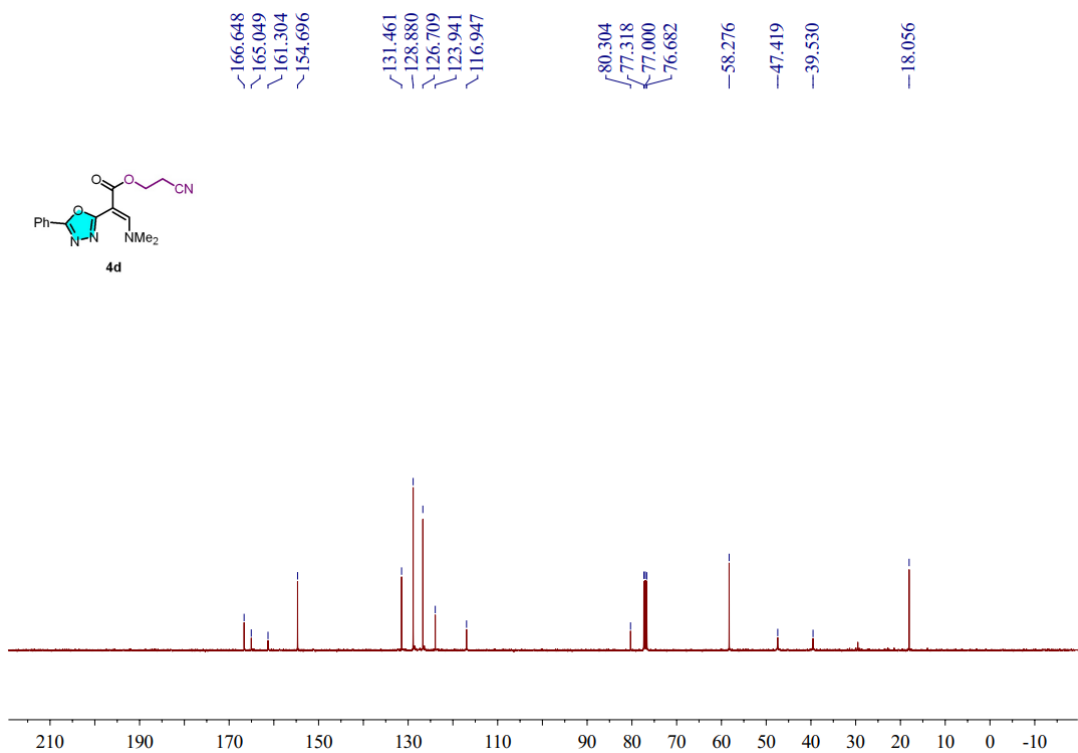

<sup>13</sup>C {<sup>1</sup>H} NMR Spectrum of Compound **4d** (100 MHz, CDCl<sub>3</sub>)

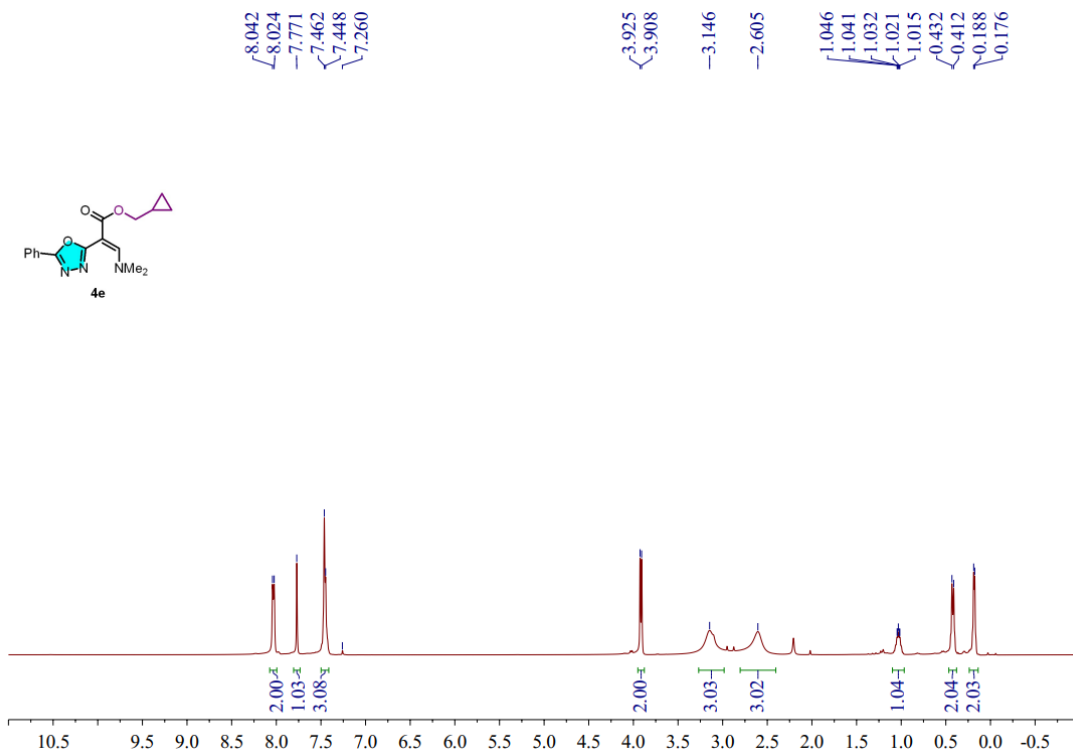

$^1\text{H}$  NMR Spectrum of Compound **4e** (400 MHz,  $\text{CDCl}_3$ )

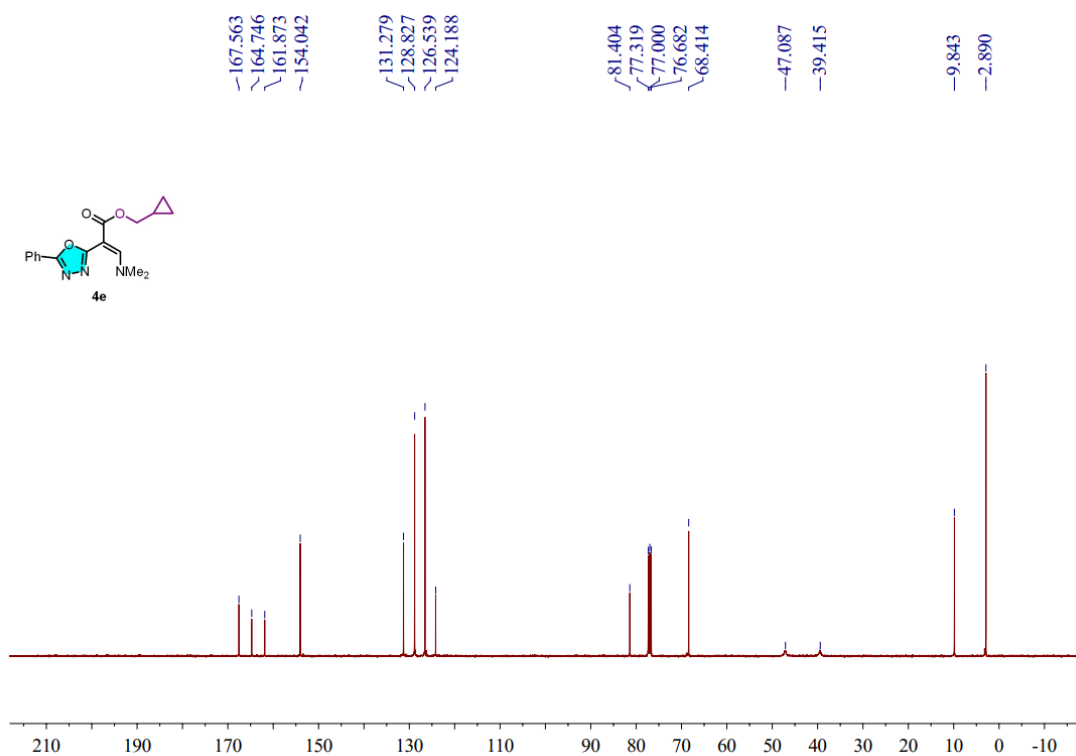

$^{13}\text{C}$  NMR Spectrum of Compound **4e** (100 MHz,  $\text{CDCl}_3$ )

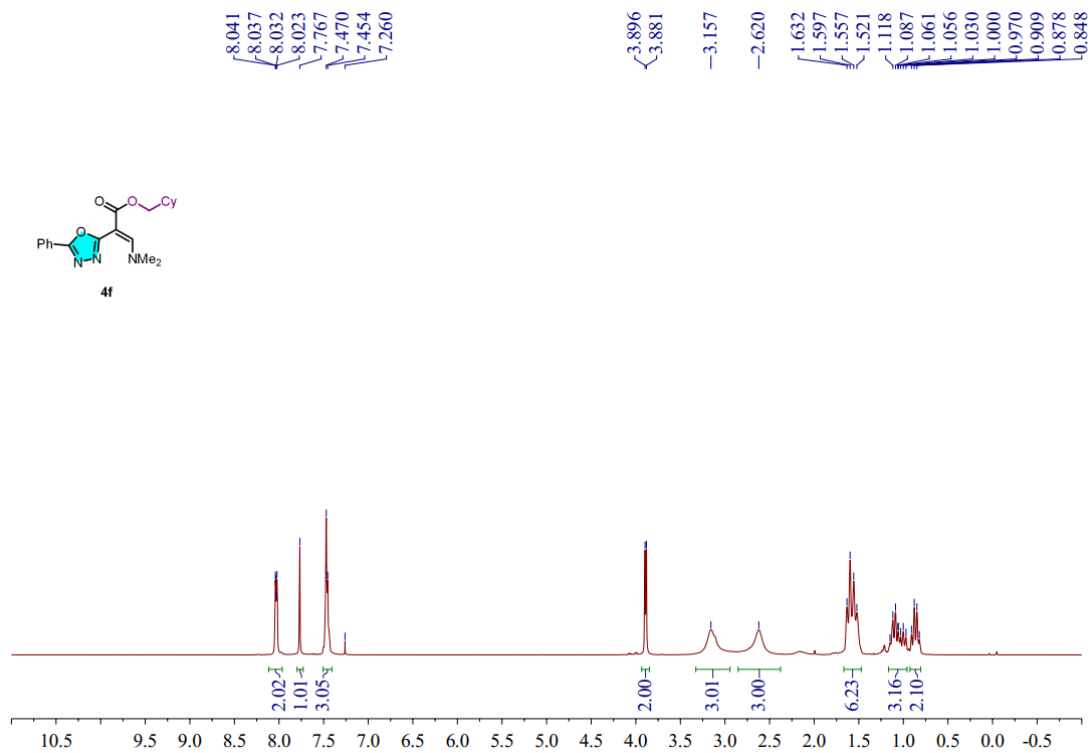

$^1\text{H}$  NMR Spectrum of Compound **4f** (400 MHz,  $\text{CDCl}_3$ )

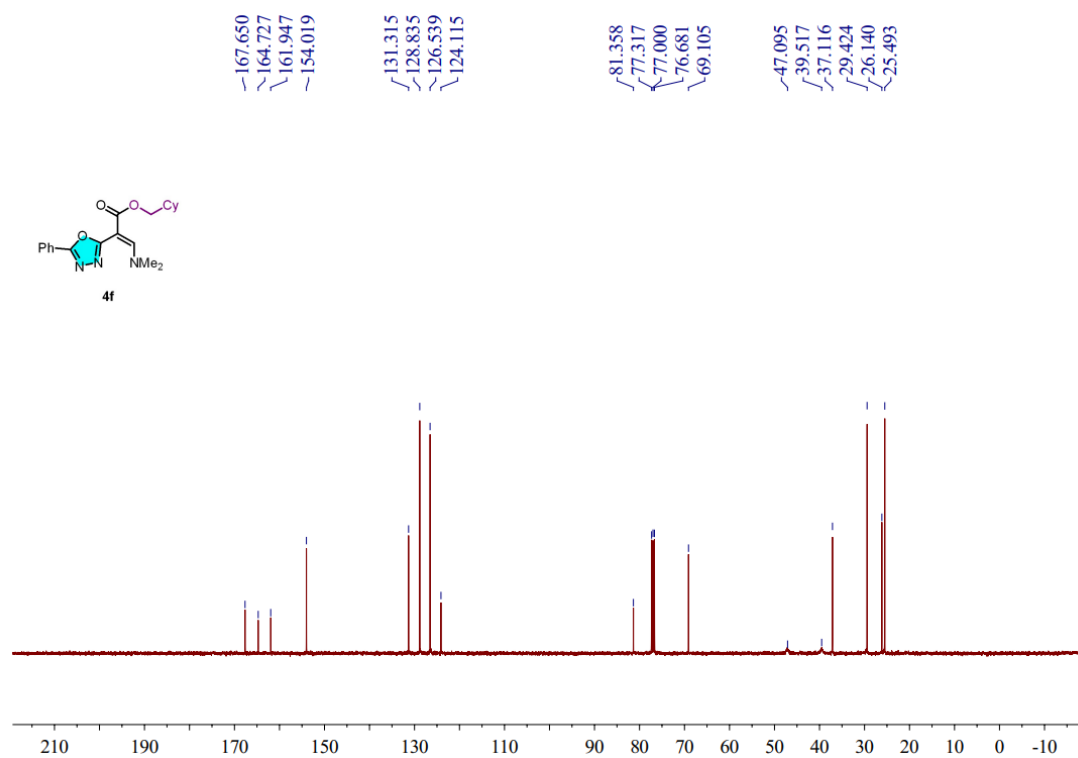

$^{13}\text{C}\{^1\text{H}\}$  NMR Spectrum of Compound **4f** (100 MHz,  $\text{CDCl}_3$ )

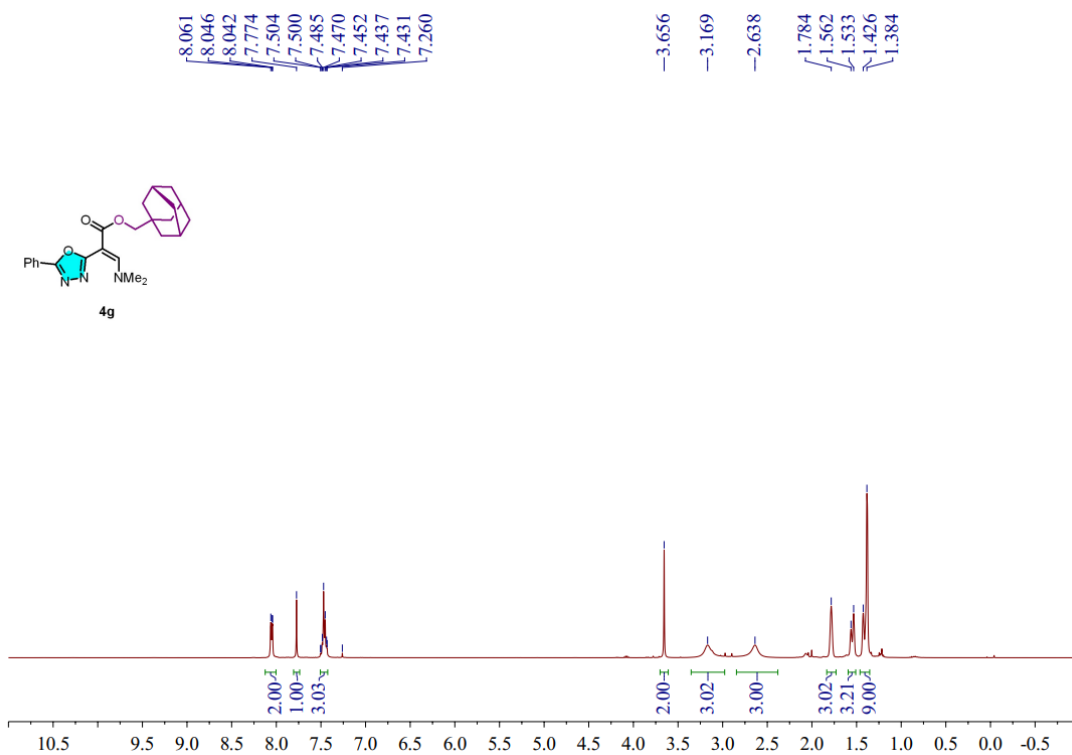

$^1\text{H}$  NMR Spectrum of Compound **4g** (400 MHz,  $\text{CDCl}_3$ )

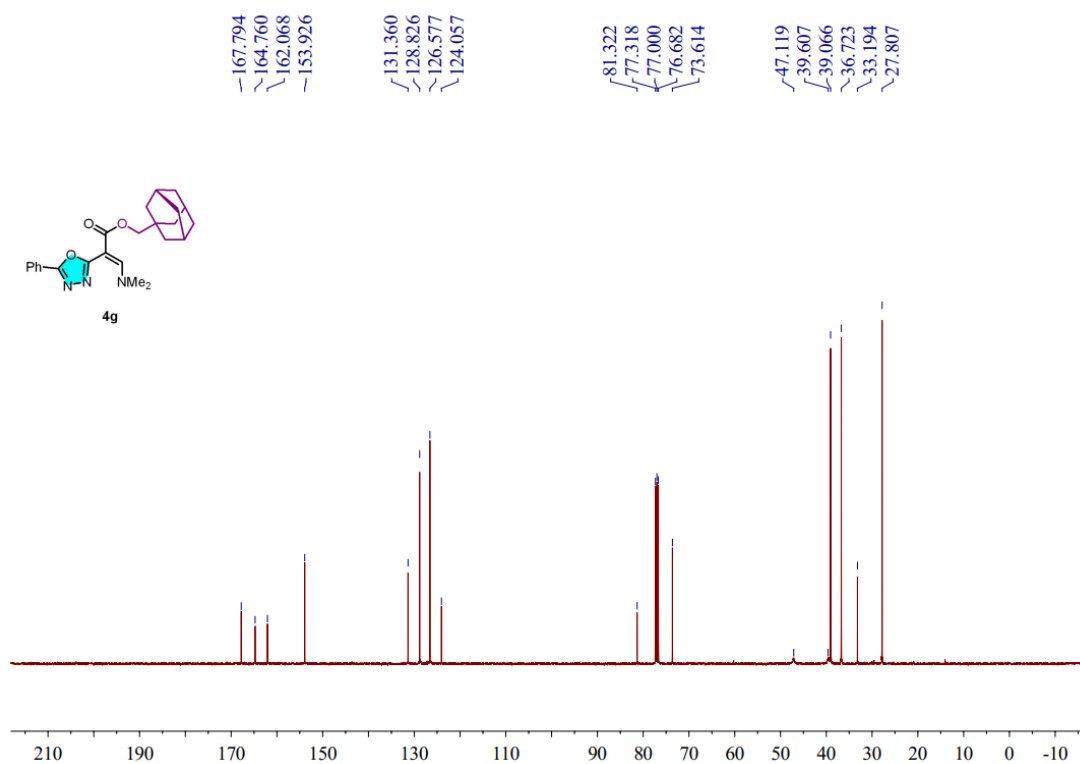

$^{13}\text{C}\{^1\text{H}\}$  NMR Spectrum of Compound **4g** (100 MHz,  $\text{CDCl}_3$ )



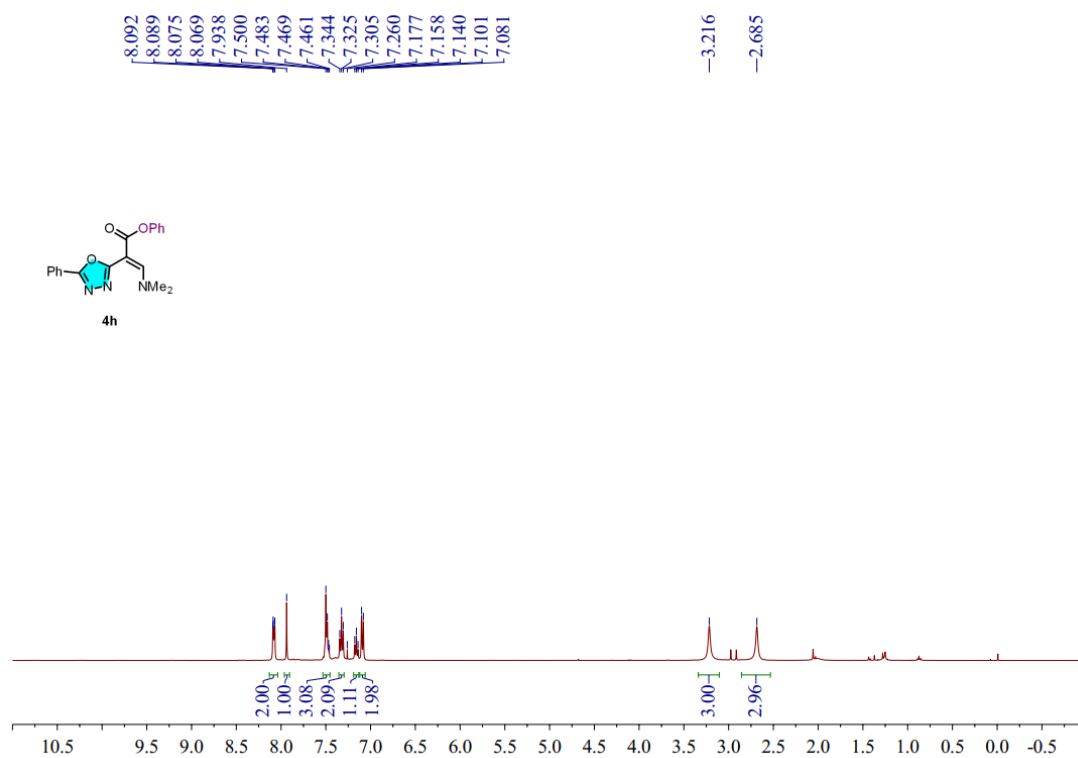

<sup>1</sup>H NMR Spectrum of Compound **4h** (400 MHz, CDCl<sub>3</sub>)

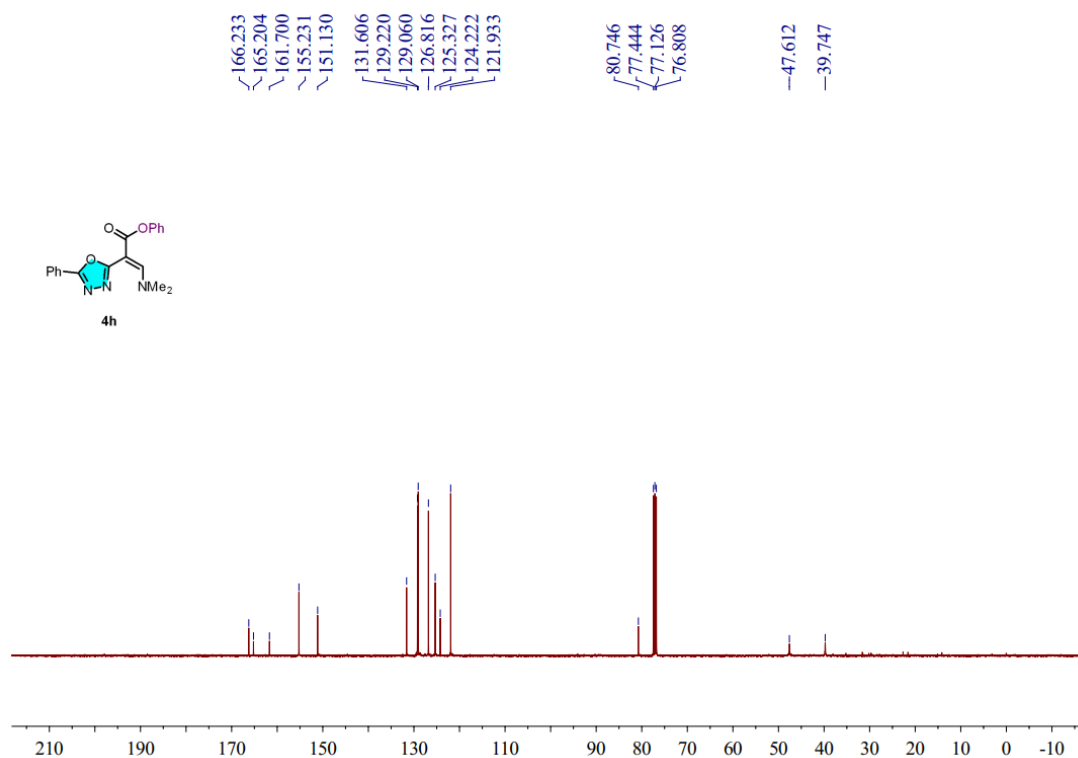

<sup>13</sup>C {<sup>1</sup>H} NMR Spectrum of Compound **4h** (100 MHz, CDCl<sub>3</sub>)

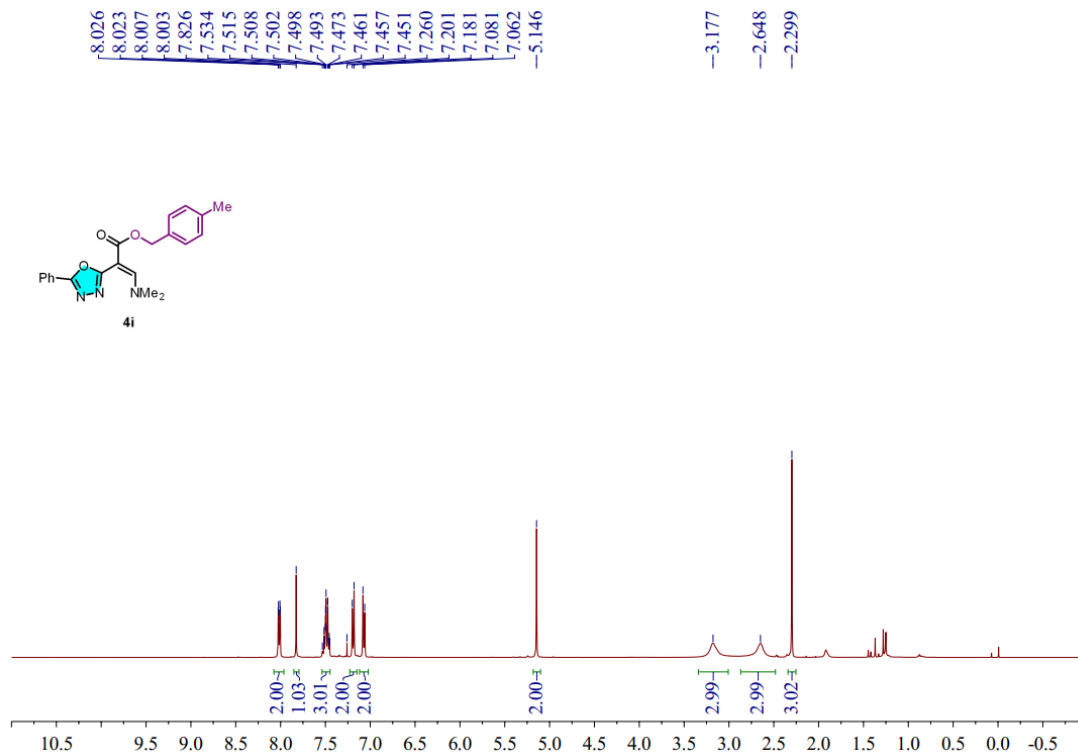

$^1\text{H}$  NMR Spectrum of Compound **4i** (400 MHz,  $\text{CDCl}_3$ )

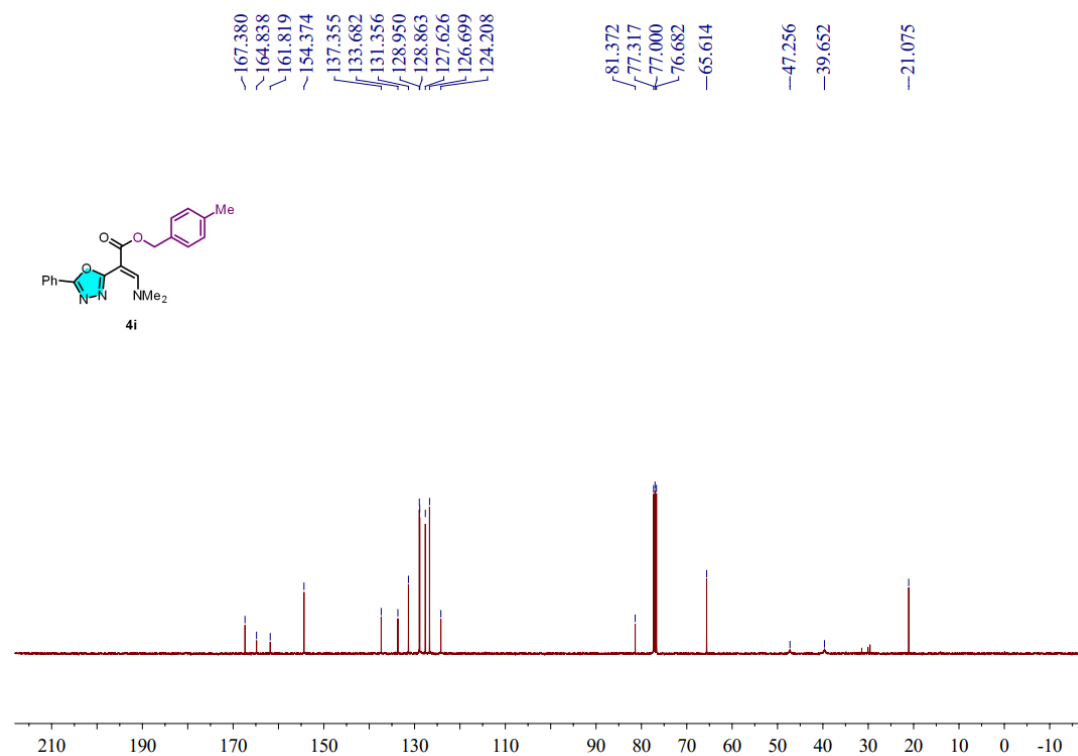

$^{13}\text{C}\{^1\text{H}\}$  NMR Spectrum of Compound **4i** (100 MHz,  $\text{CDCl}_3$ )

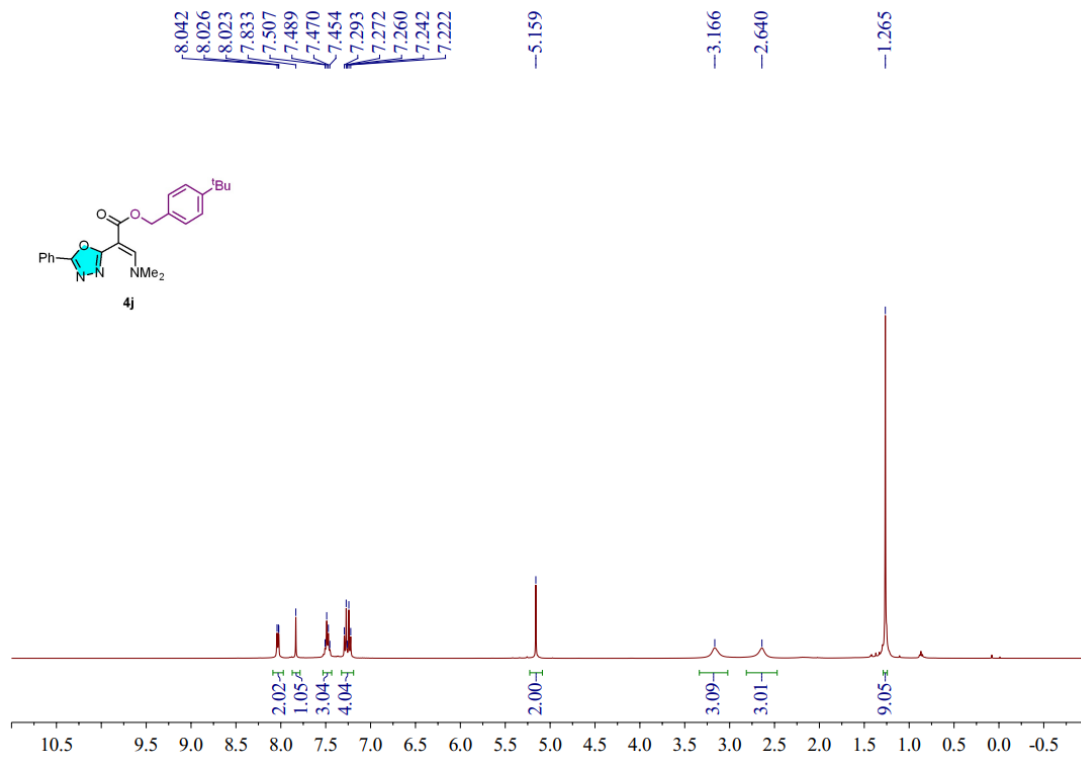

<sup>1</sup>H NMR Spectrum of Compound **4j** (400 MHz, CDCl<sub>3</sub>)

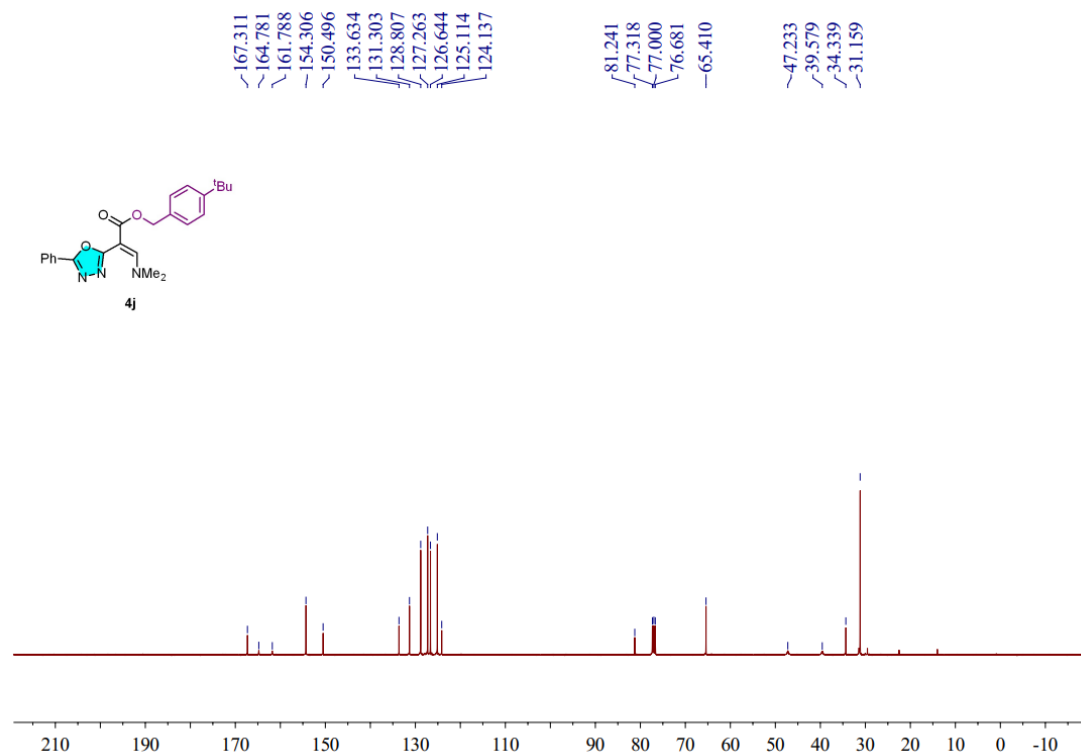

<sup>13</sup>C {<sup>1</sup>H} NMR Spectrum of Compound **4j** (100 MHz, CDCl<sub>3</sub>)

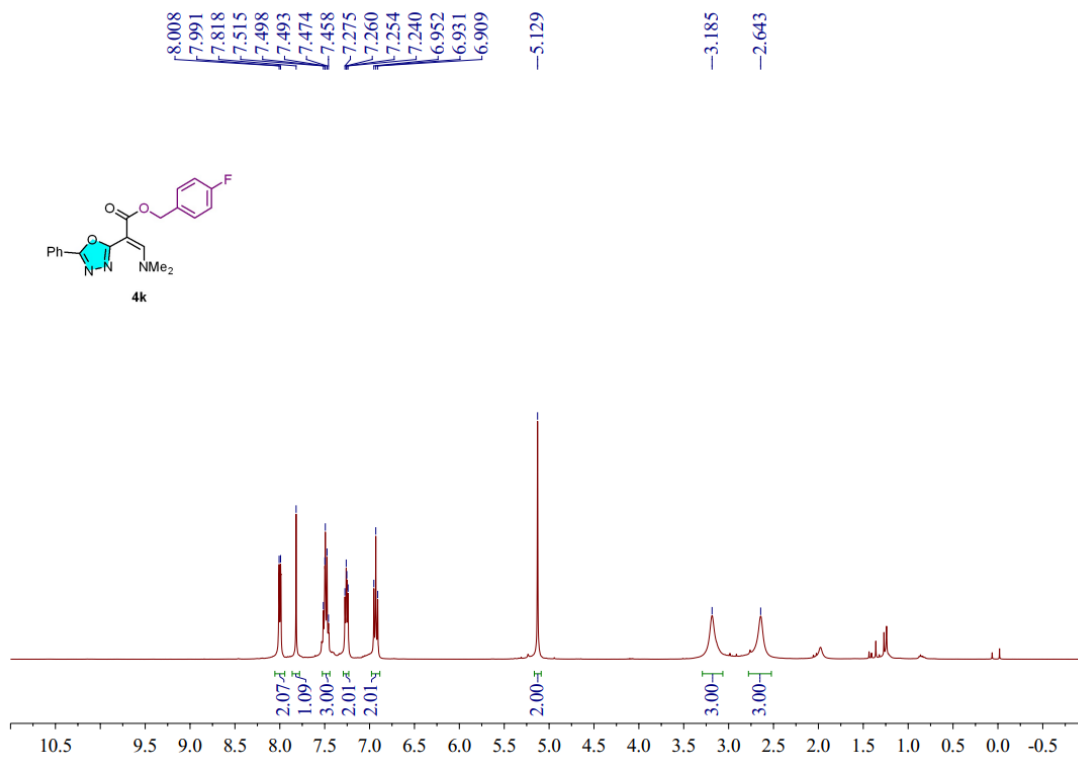

**<sup>1</sup>H NMR Spectrum of Compound 4k (400 MHz, CDCl<sub>3</sub>)**

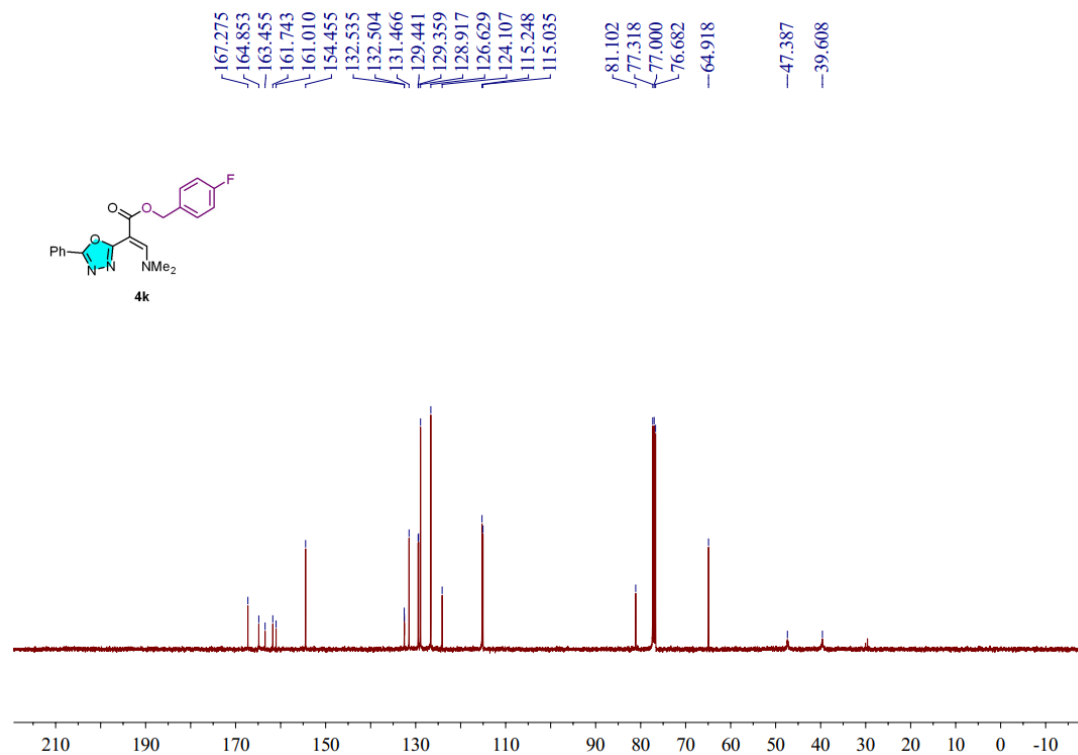

**<sup>13</sup>C {<sup>1</sup>H} NMR Spectrum of Compound 4k (100 MHz, CDCl<sub>3</sub>)**

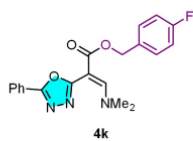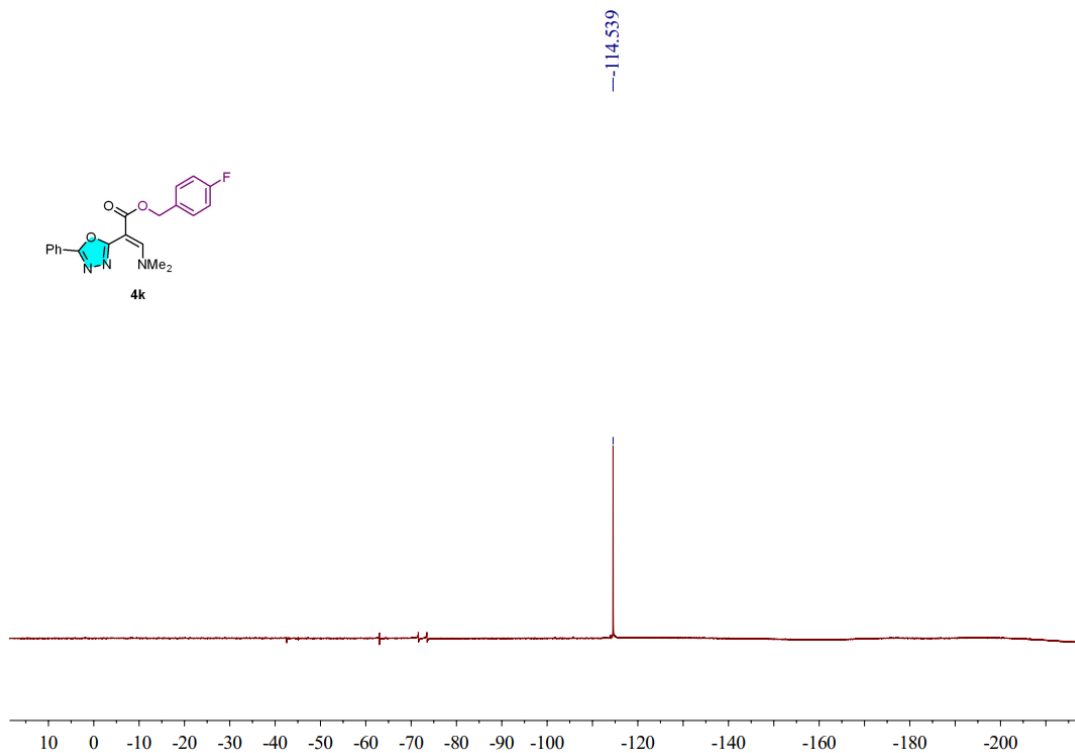

$^{19}\text{F}\{^1\text{H}\}$  NMR Spectrum of Compound **4k** (376 MHz,  $\text{CDCl}_3$ )

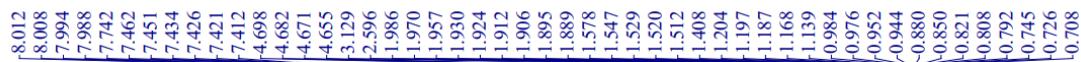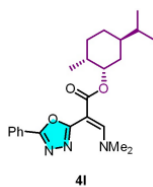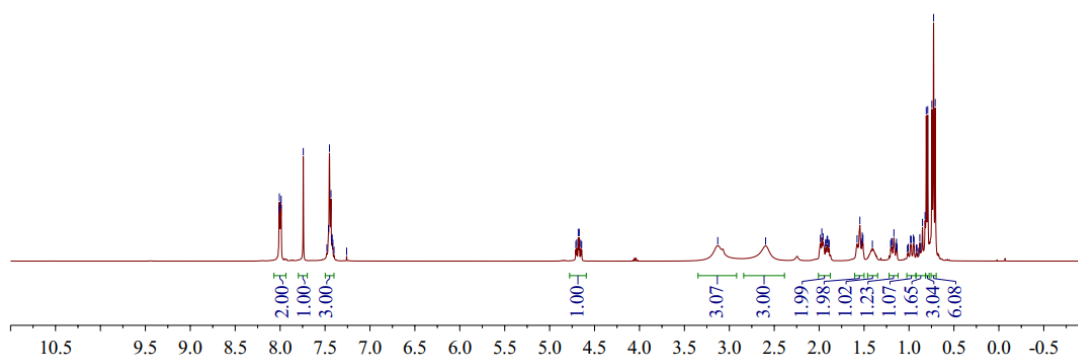

$^1\text{H}$  NMR Spectrum of Compound **4l** (400 MHz,  $\text{CDCl}_3$ )

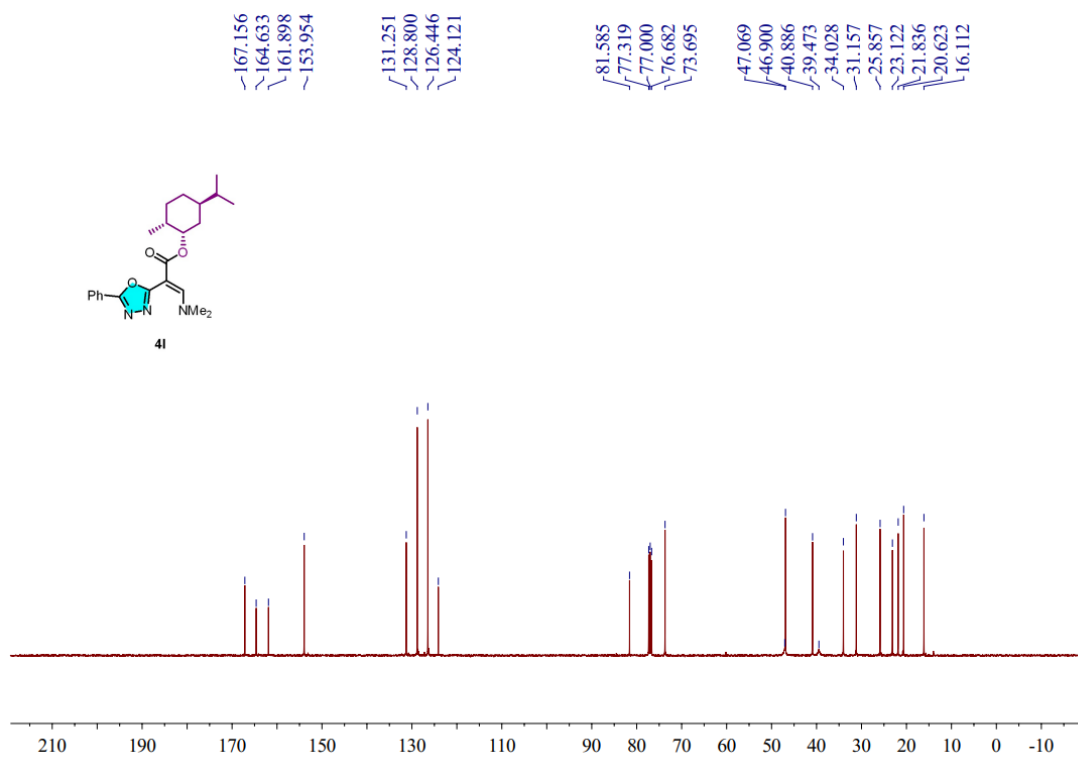

$^{13}\text{C}\{^1\text{H}\}$  NMR Spectrum of Compound **4l** (100 MHz,  $\text{CDCl}_3$ )

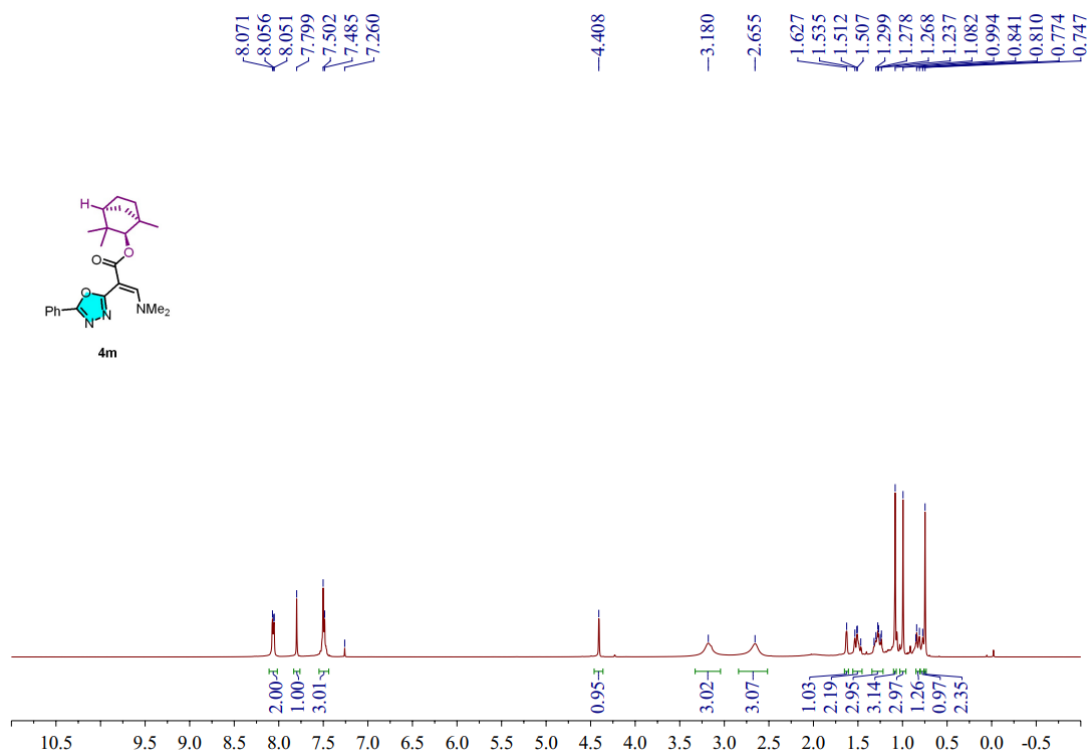

$^1\text{H}$  NMR Spectrum of Compound **4m** (400 MHz,  $\text{CDCl}_3$ )

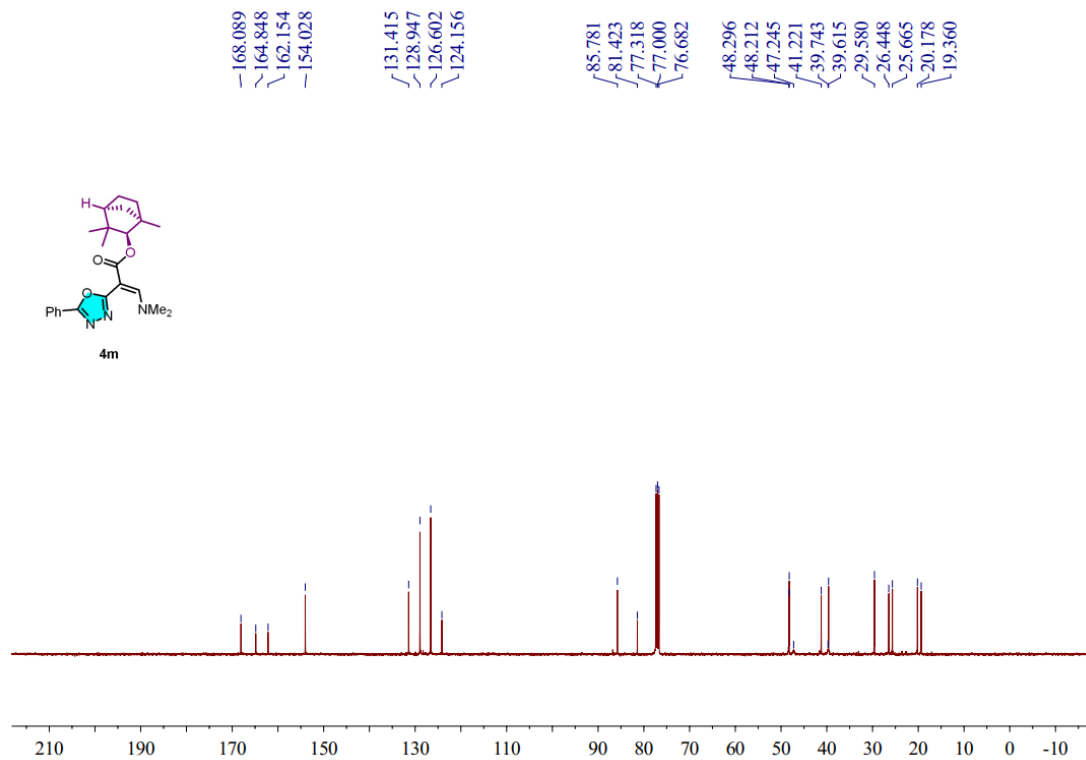

$^{13}\text{C}\{^1\text{H}\}$  NMR Spectrum of Compound **4m** (100 MHz,  $\text{CDCl}_3$ )

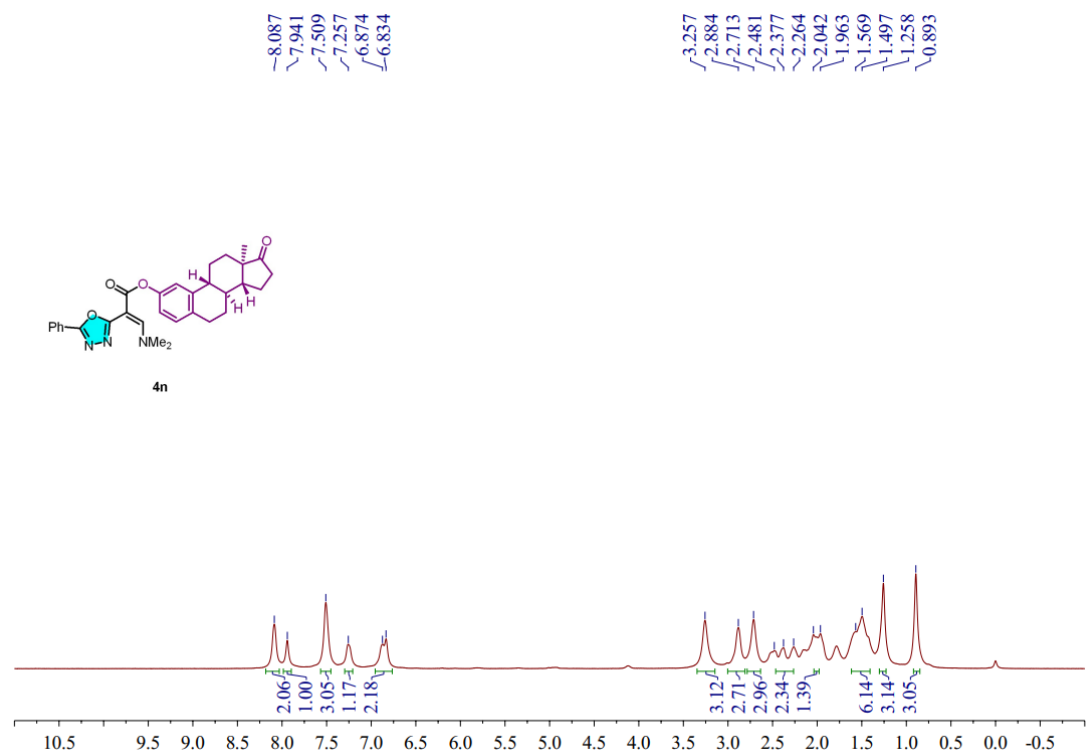

$^1\text{H}$  NMR Spectrum of Compound **4n** (400 MHz,  $\text{CDCl}_3$ )

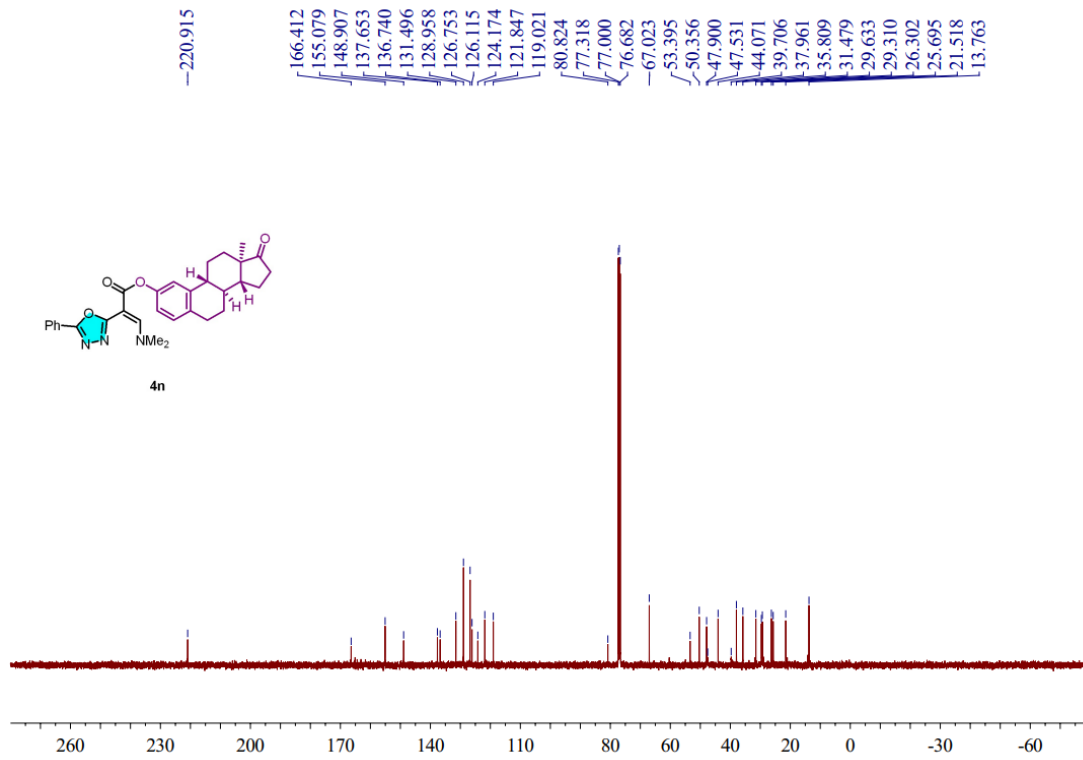

$^{13}\text{C}$  { $^1\text{H}$ } NMR Spectrum of Compound **4n** (100 MHz,  $\text{CDCl}_3$ )

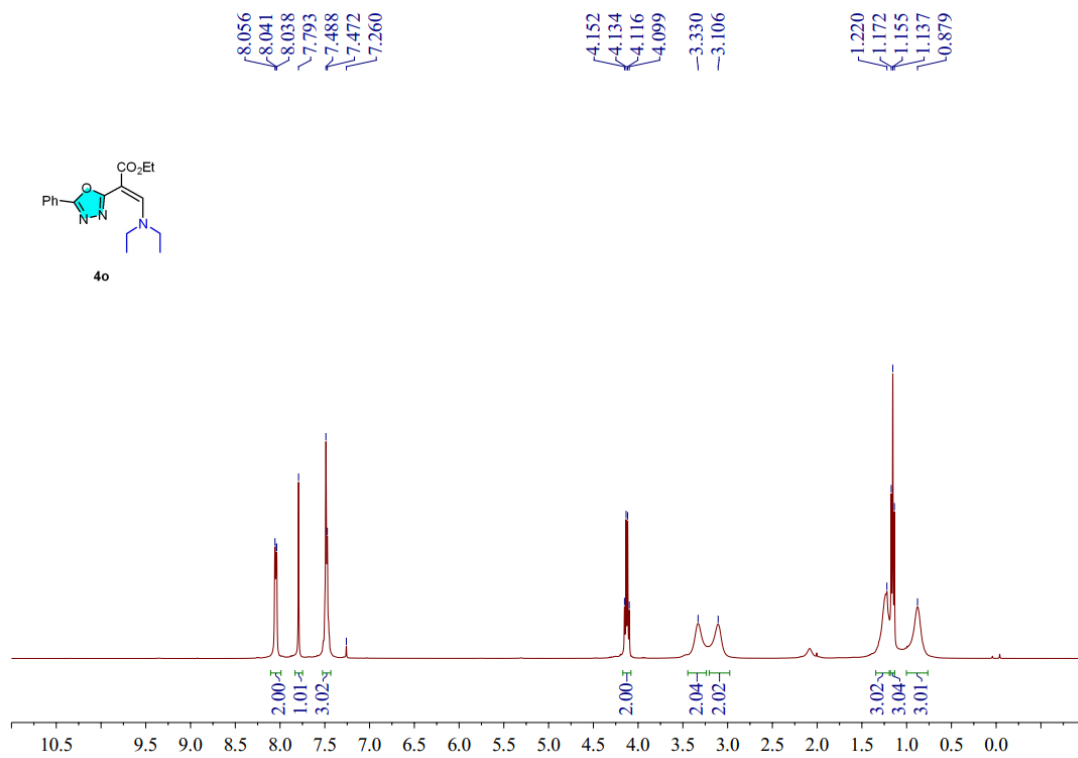

$^1\text{H}$  NMR Spectrum of Compound **4o** (400 MHz,  $\text{CDCl}_3$ )



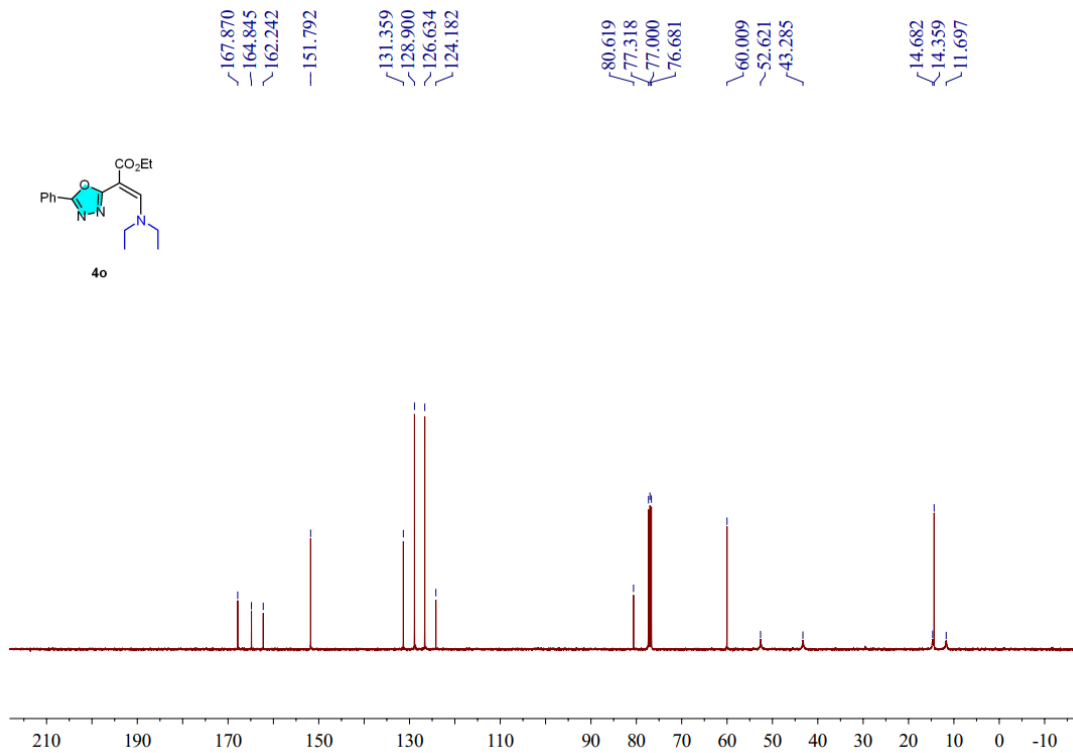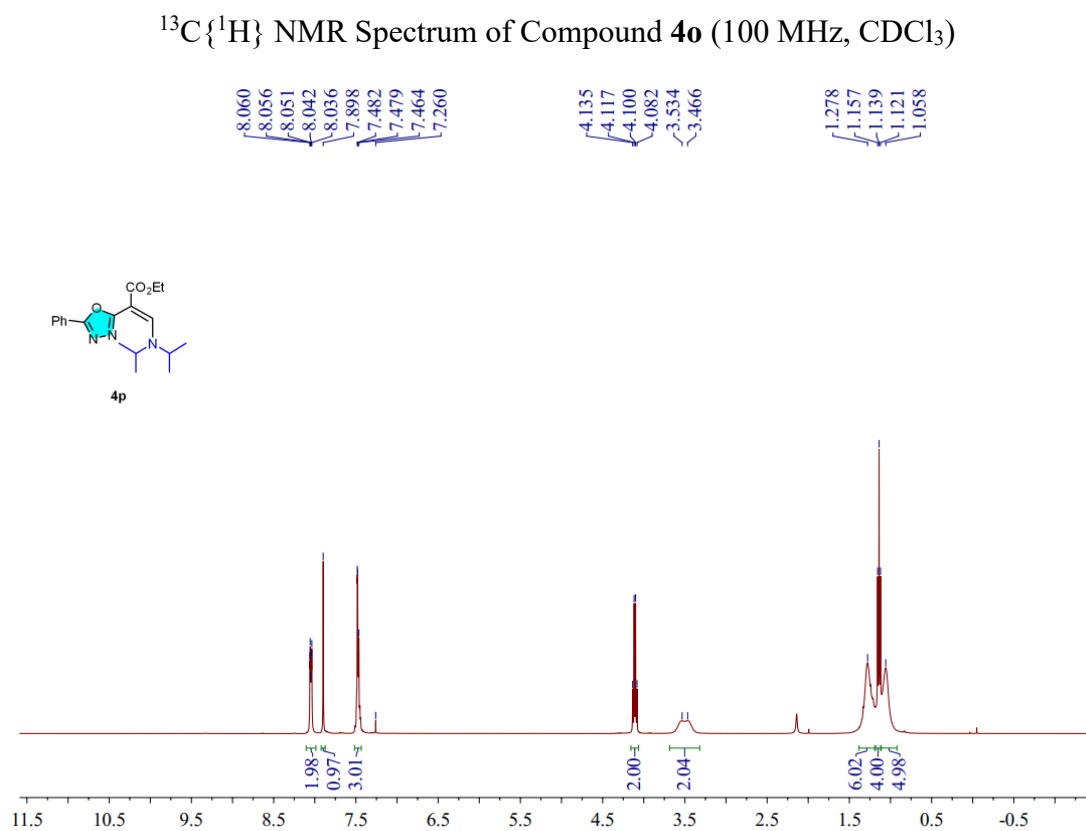

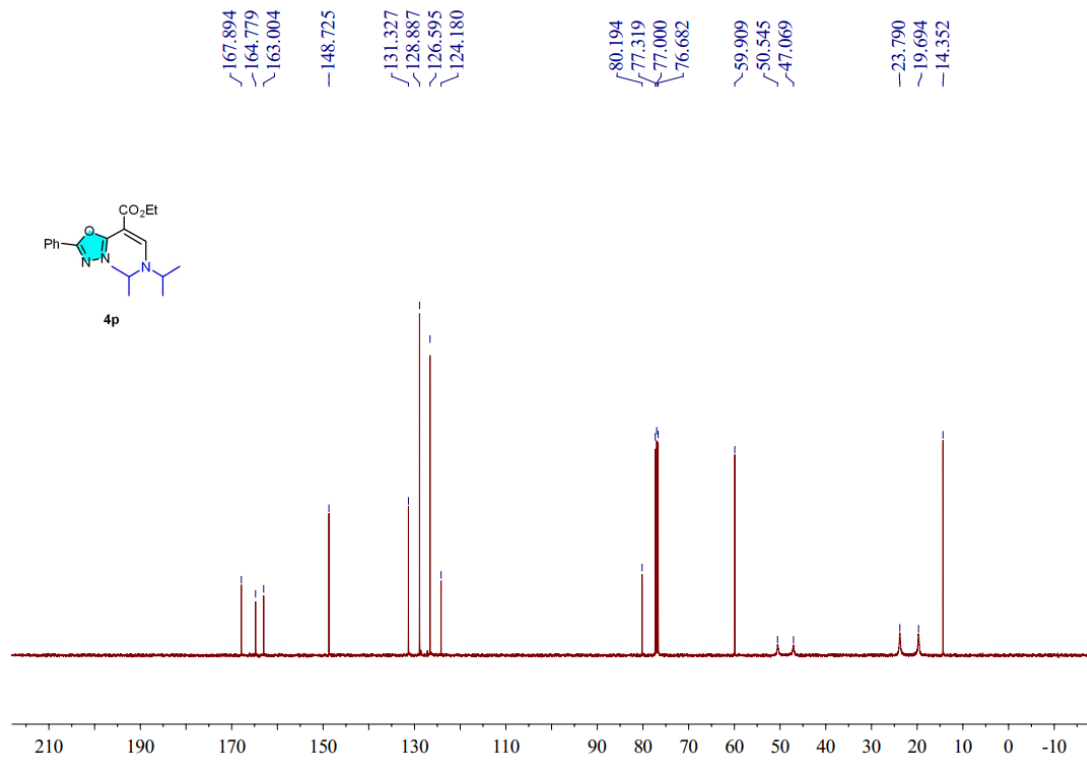

$^{13}\text{C}\{^1\text{H}\}$  NMR Spectrum of Compound **4p** (100 MHz,  $\text{CDCl}_3$ )

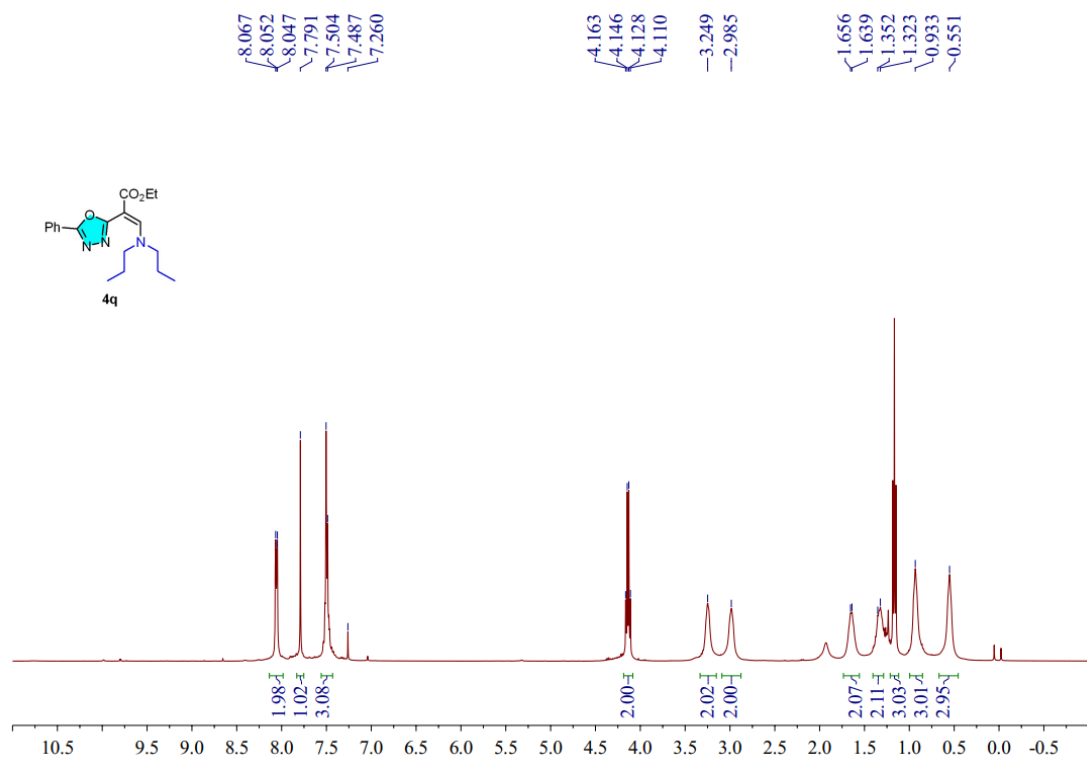

$^1\text{H}$  NMR Spectrum of Compound **4q** (400 MHz,  $\text{CDCl}_3$ )

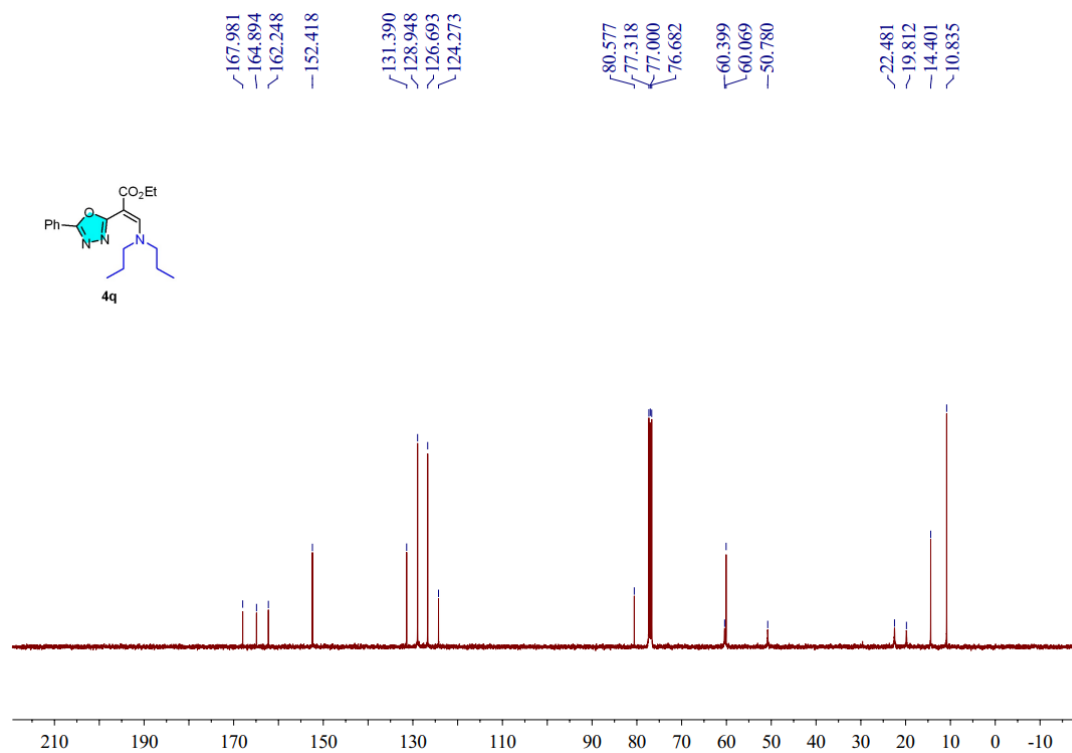

$^{13}\text{C}\{^1\text{H}\}$  NMR Spectrum of Compound **4q** (100 MHz, CDCl<sub>3</sub>)

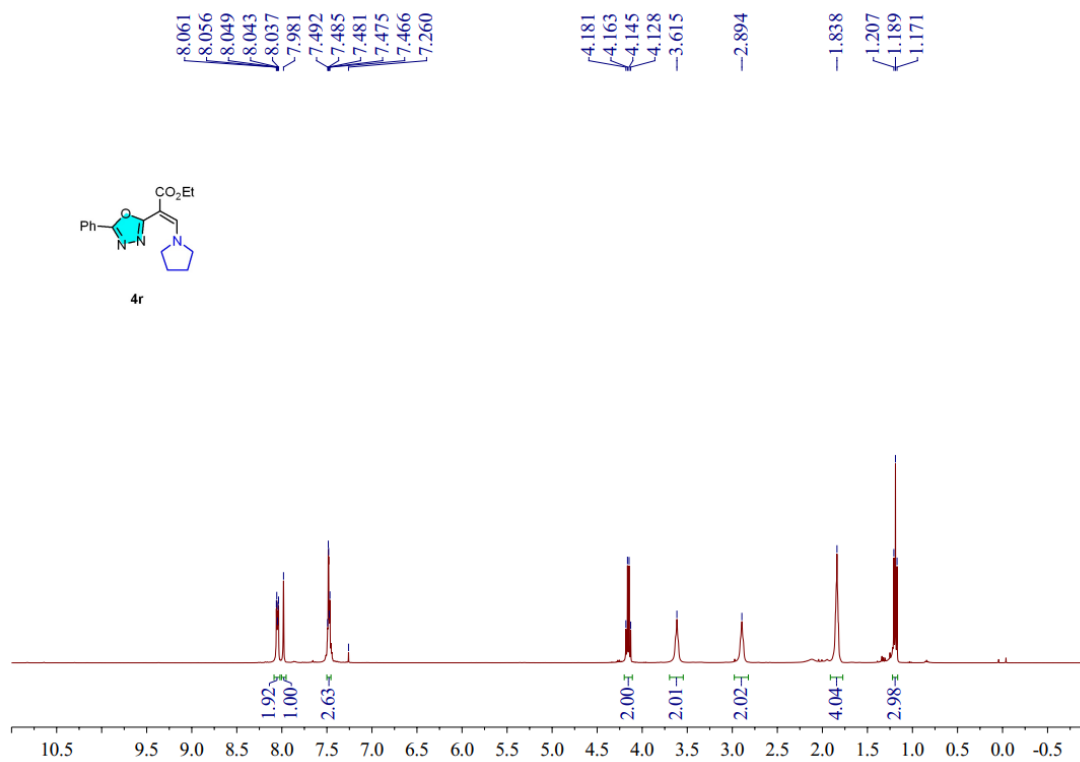

$^1\text{H}$  NMR Spectrum of Compound **4r** (400 MHz, CDCl<sub>3</sub>)

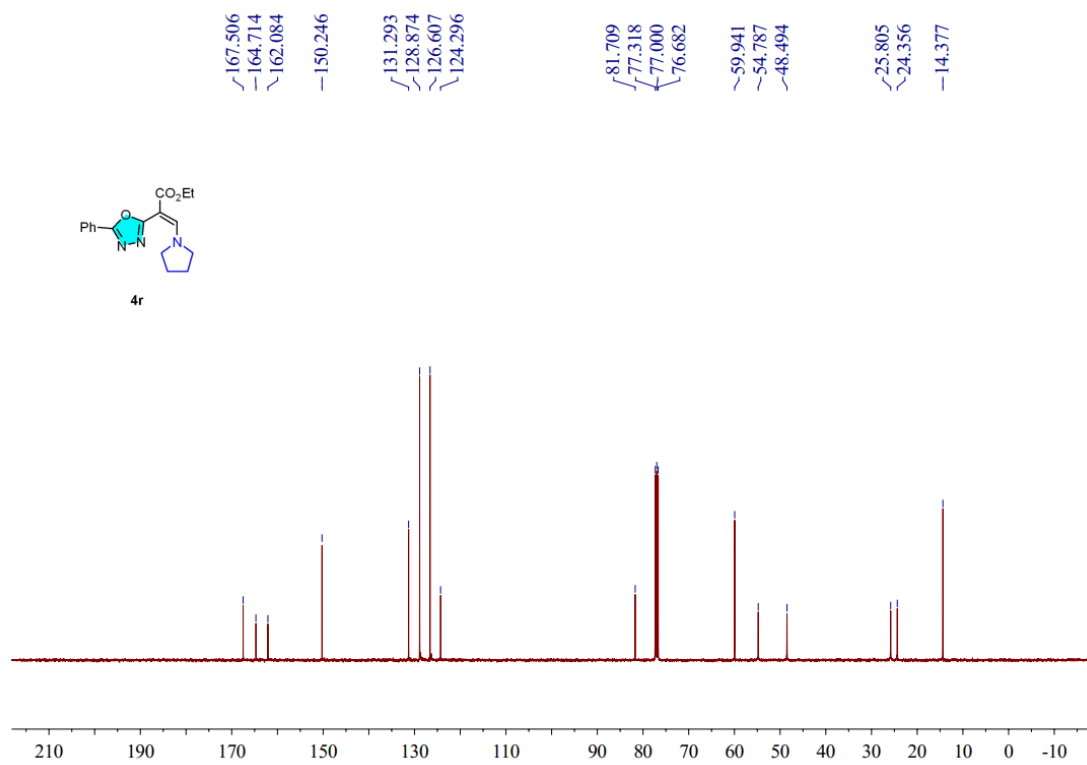

<sup>13</sup>C {<sup>1</sup>H} NMR Spectrum of Compound **4r** (100 MHz, CDCl<sub>3</sub>)

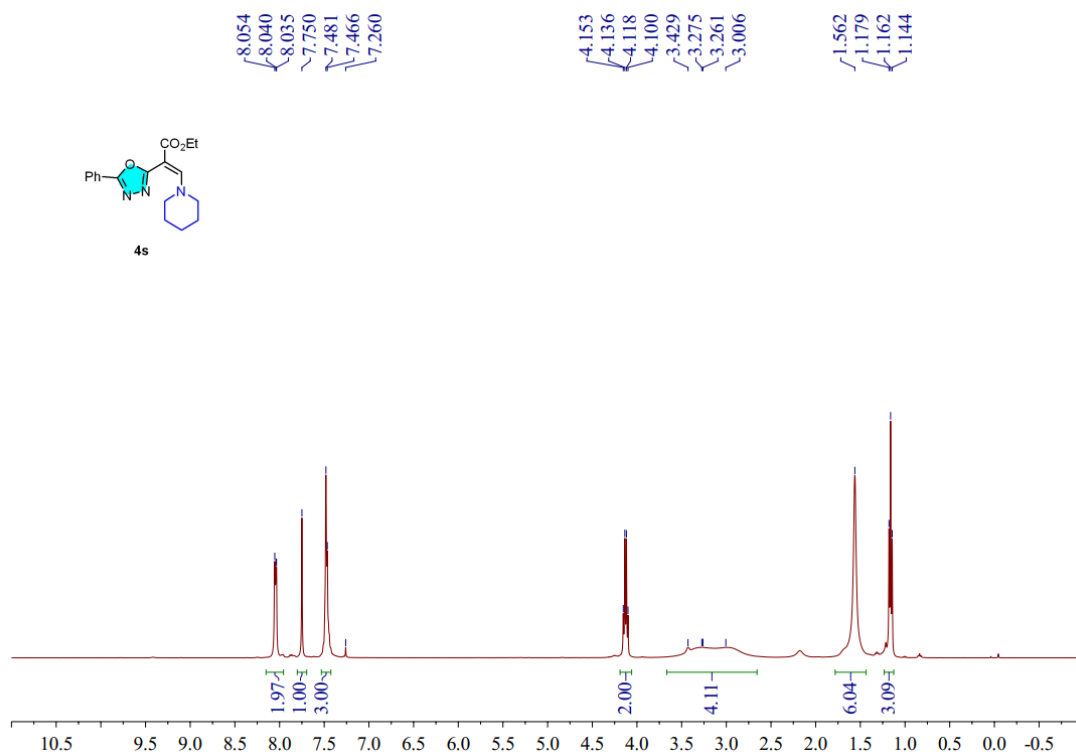

<sup>1</sup>H NMR Spectrum of Compound **4s** (400 MHz, CDCl<sub>3</sub>)

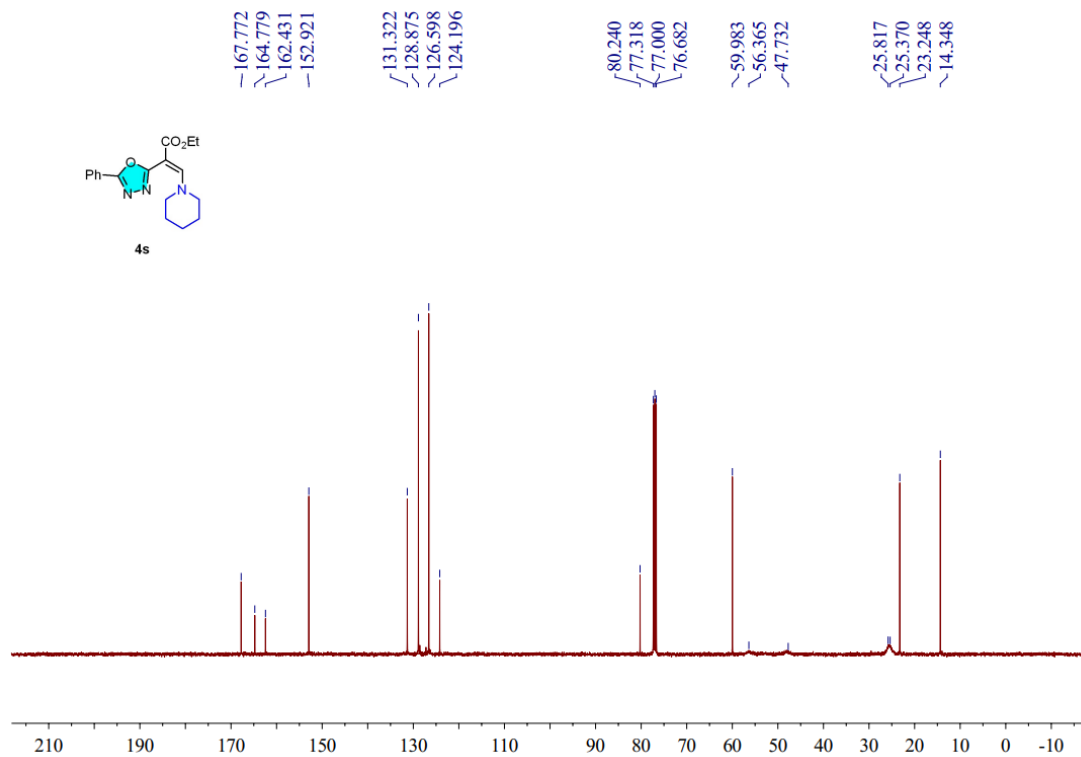

$^{13}\text{C}\{^1\text{H}\}$  NMR Spectrum of Compound **4s** (100 MHz,  $\text{CDCl}_3$ )

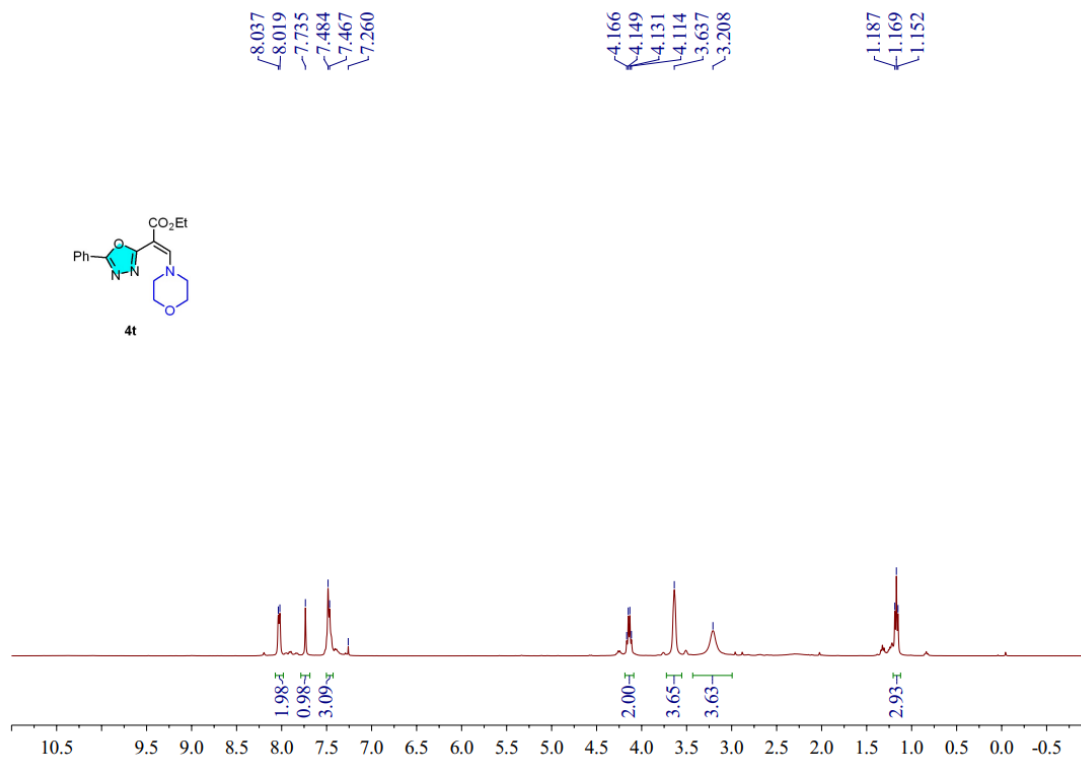

$^1\text{H}$  NMR Spectrum of Compound **4t** (400 MHz,  $\text{CDCl}_3$ )

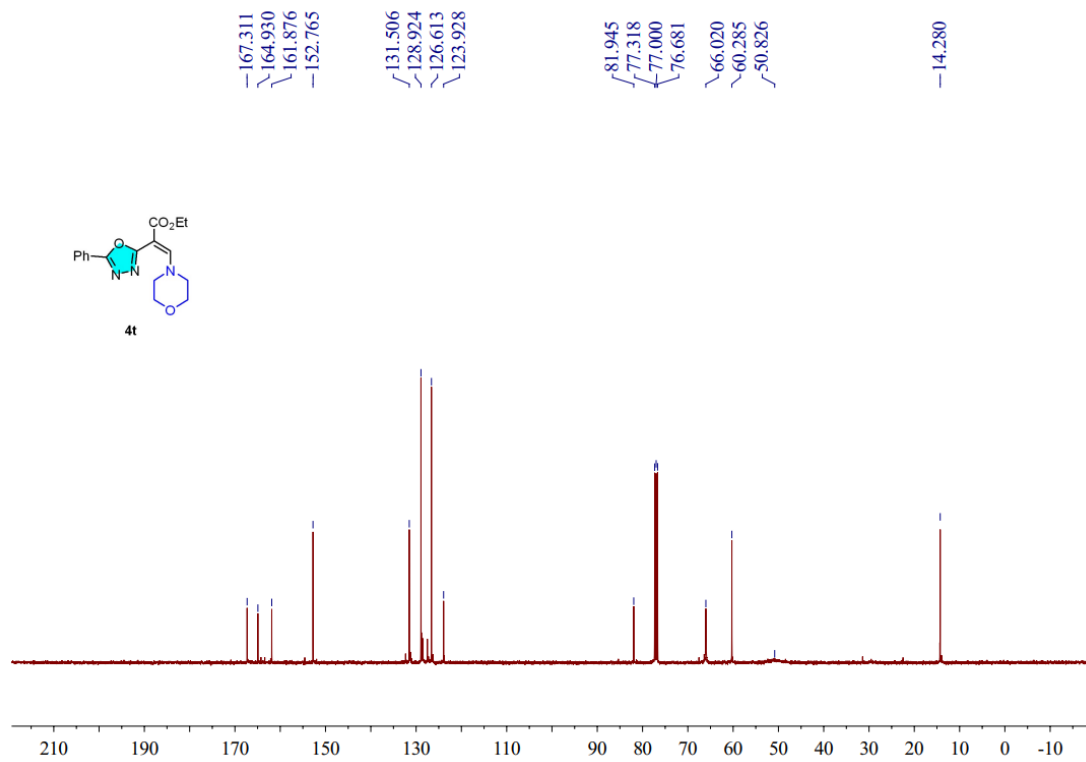

$^{13}\text{C}\{^1\text{H}\}$  NMR Spectrum of Compound **4t** (100 MHz,  $\text{CDCl}_3$ )

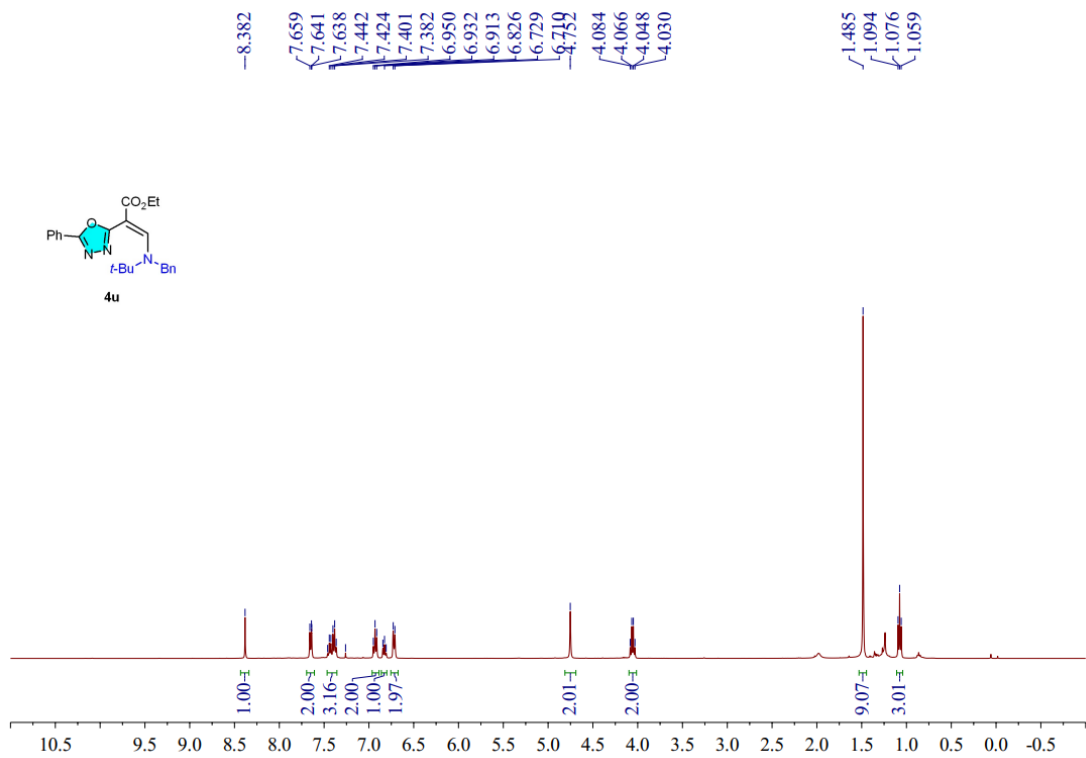

$^1\text{H}$  NMR Spectrum of Compound **4u** (400 MHz,  $\text{CDCl}_3$ )

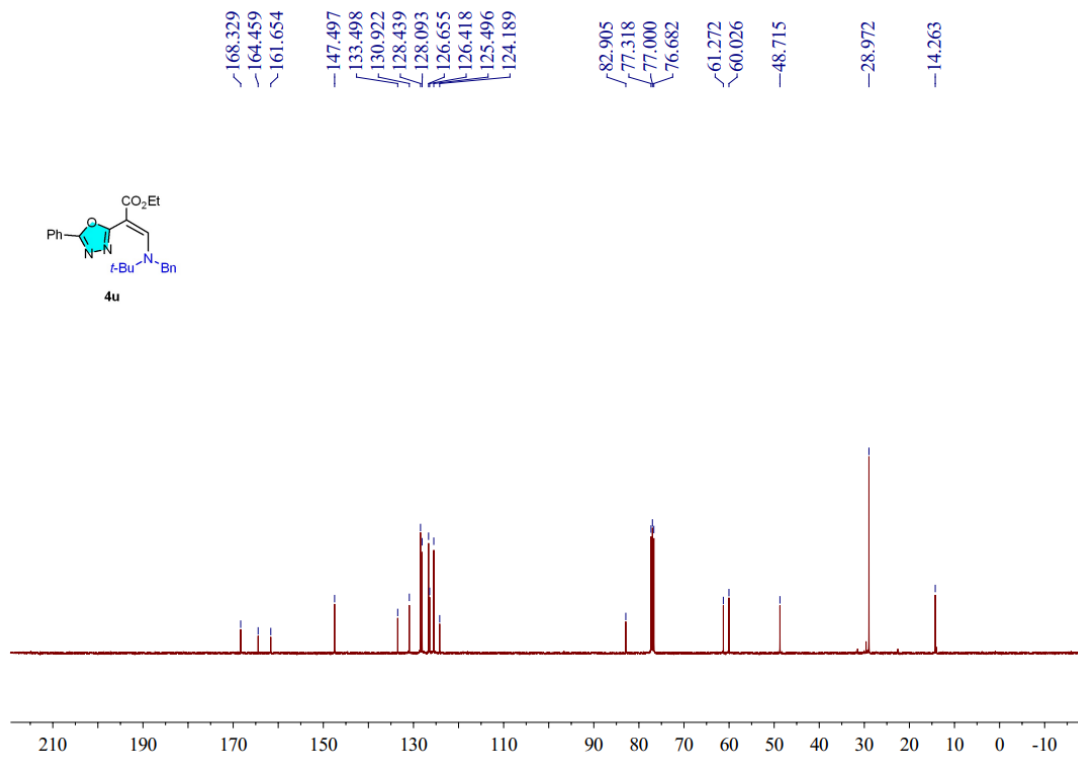

$^{13}\text{C}\{^1\text{H}\}$  NMR Spectrum of Compound **4u** (100 MHz, CDCl<sub>3</sub>)

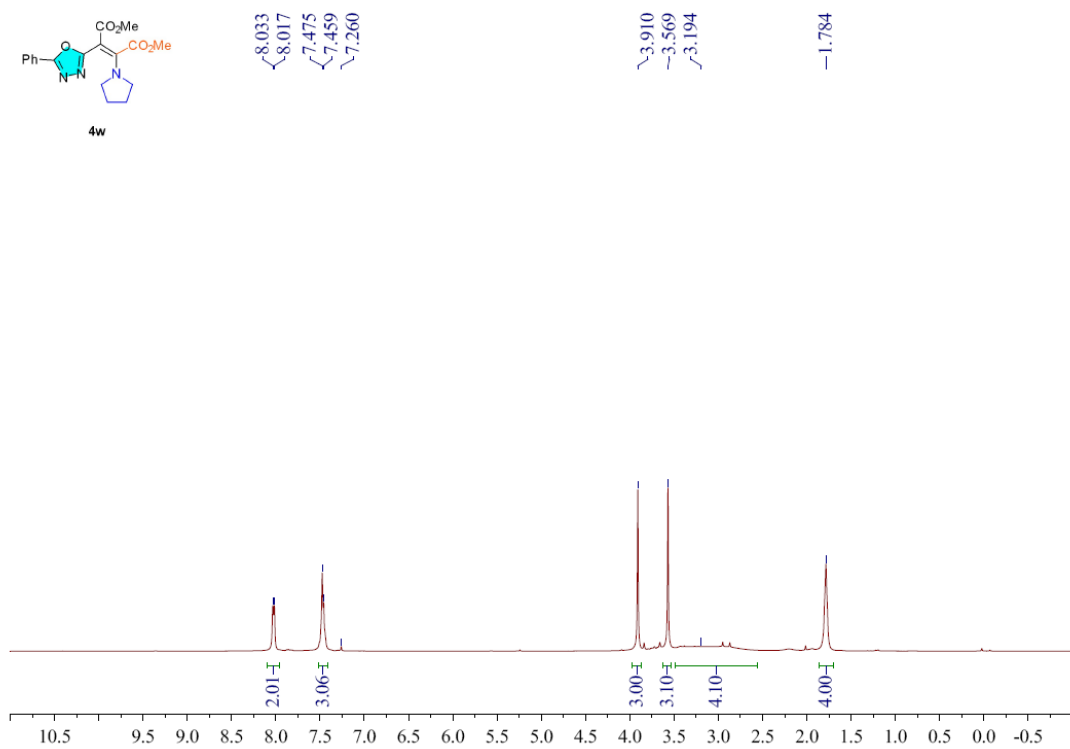

$^1\text{H}$  NMR Spectrum of Compound **4w** (400 MHz, CDCl<sub>3</sub>)

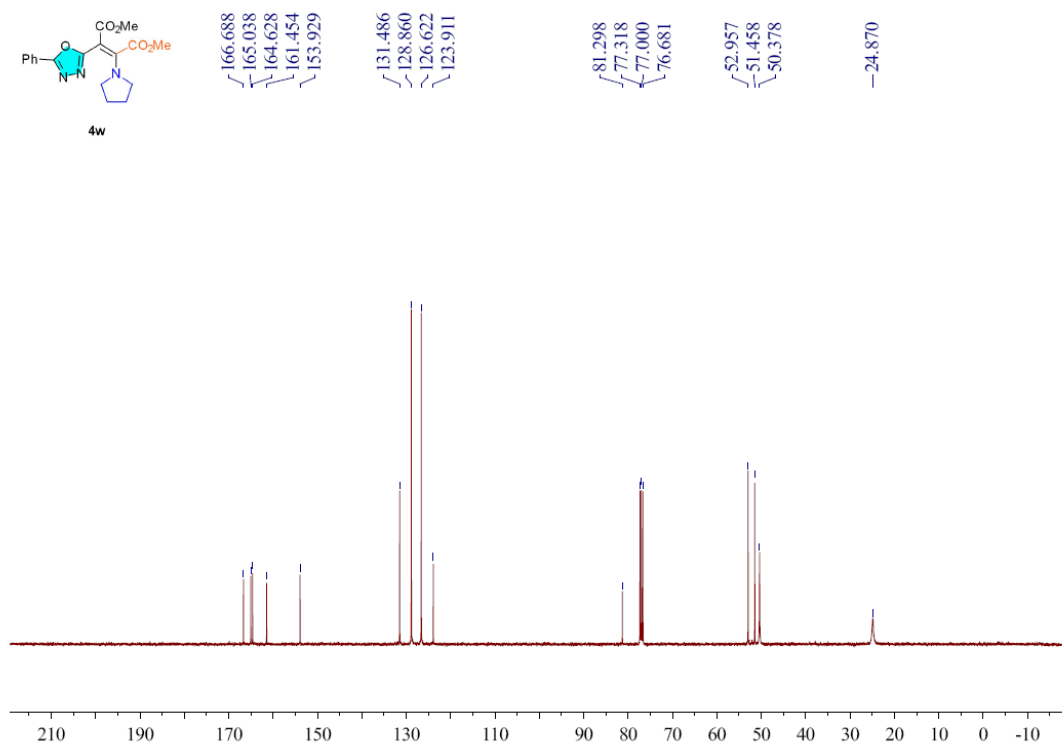

$^{13}\text{C}\{^1\text{H}\}$  NMR Spectrum of Compound **4w** (100 MHz,  $\text{CDCl}_3$ )

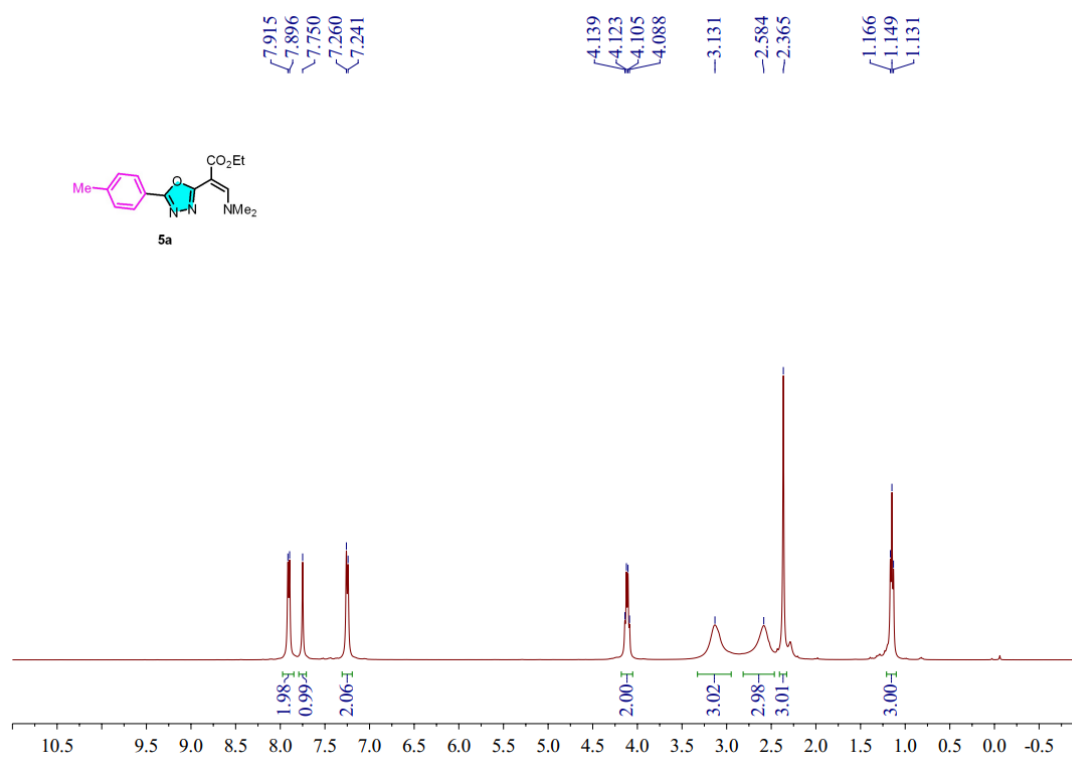

$^1\text{H}$  NMR Spectrum of Compound **5a** (400 MHz,  $\text{CDCl}_3$ )



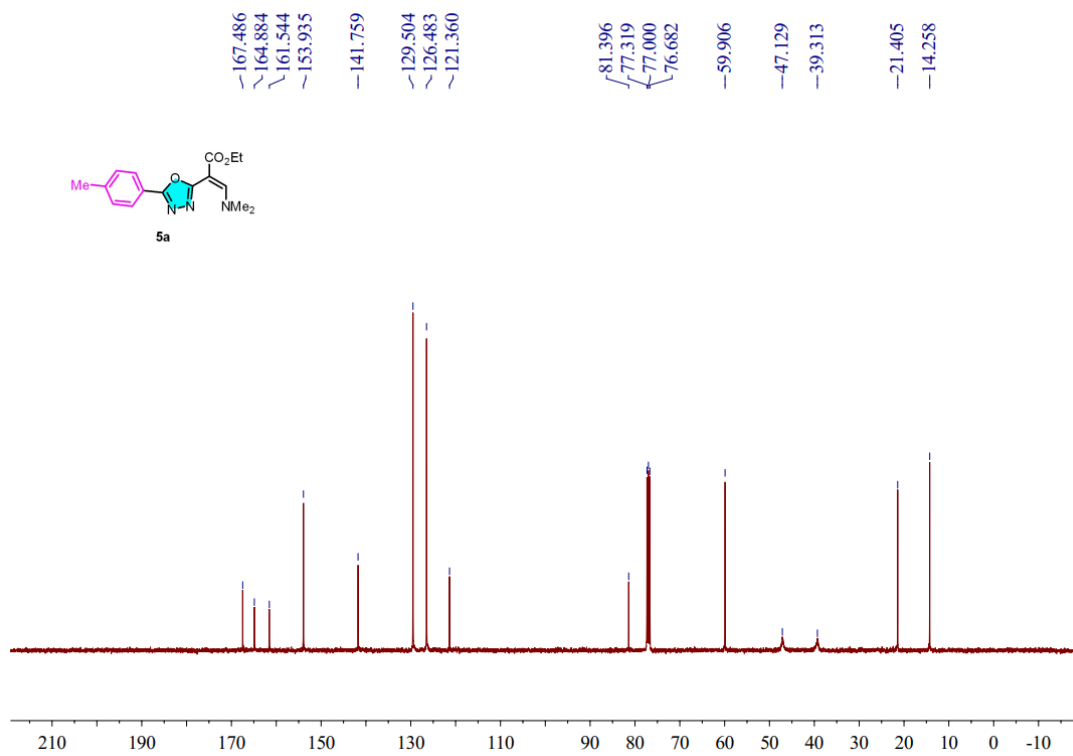

$^{13}\text{C}\{^1\text{H}\}$  NMR Spectrum of Compound **5a** (100 MHz,  $\text{CDCl}_3$ )

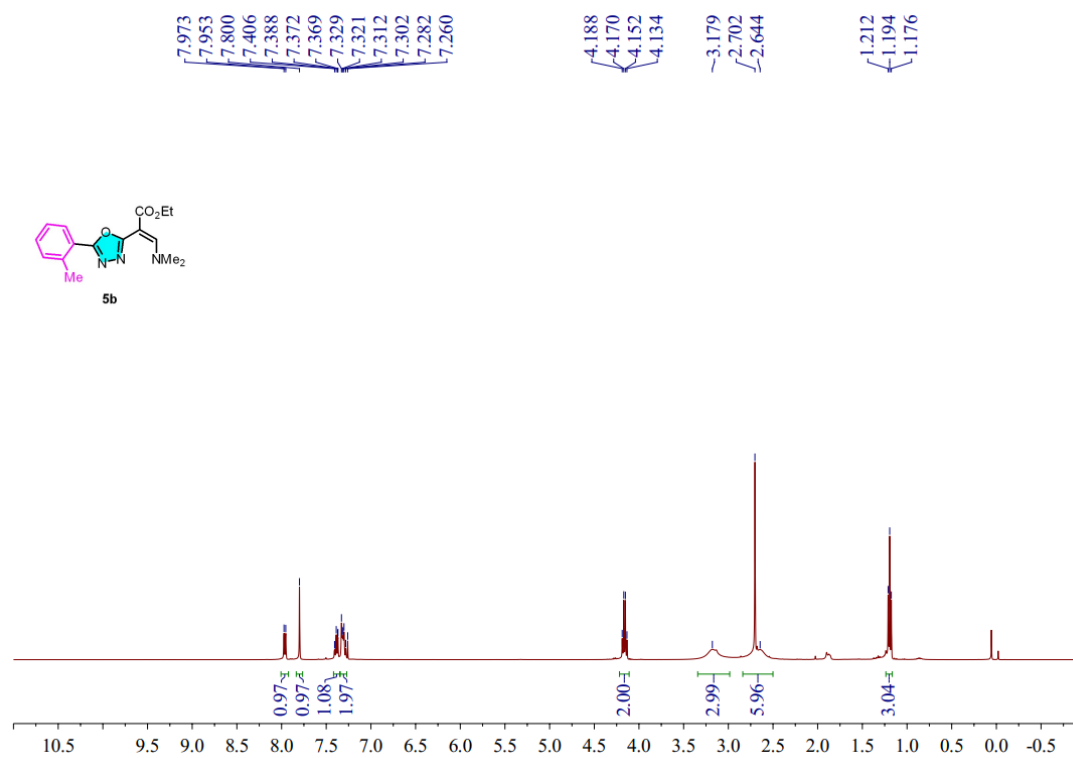

$^1\text{H}$  NMR Spectrum of Compound **5b** (400 MHz,  $\text{CDCl}_3$ )

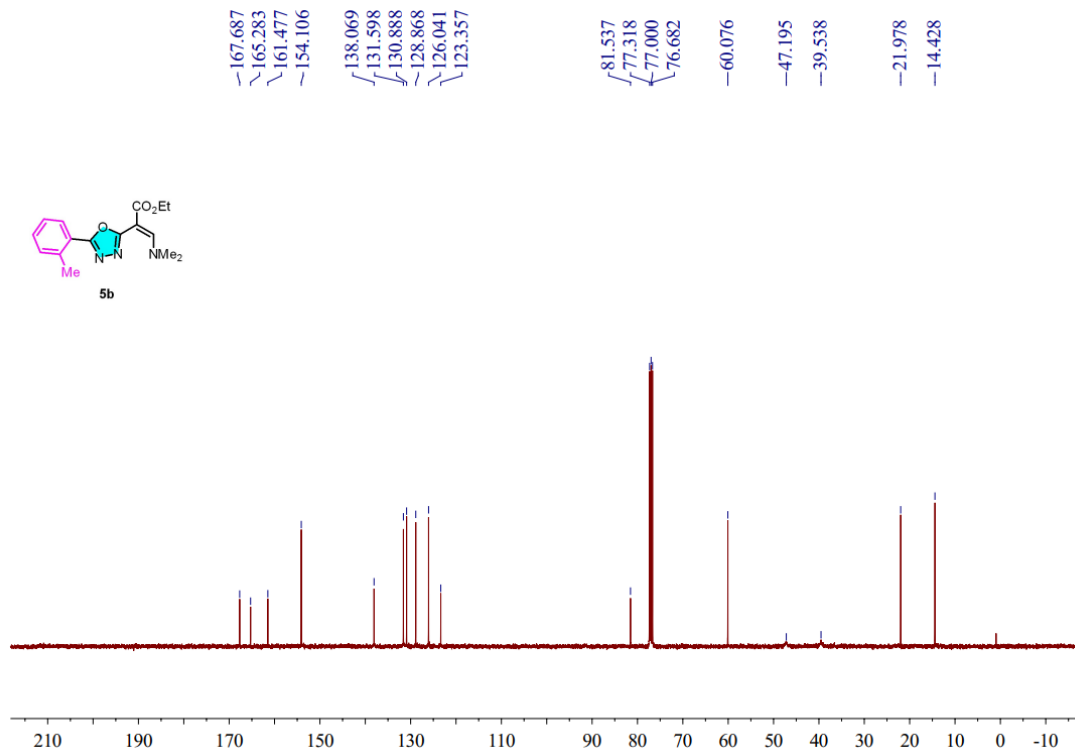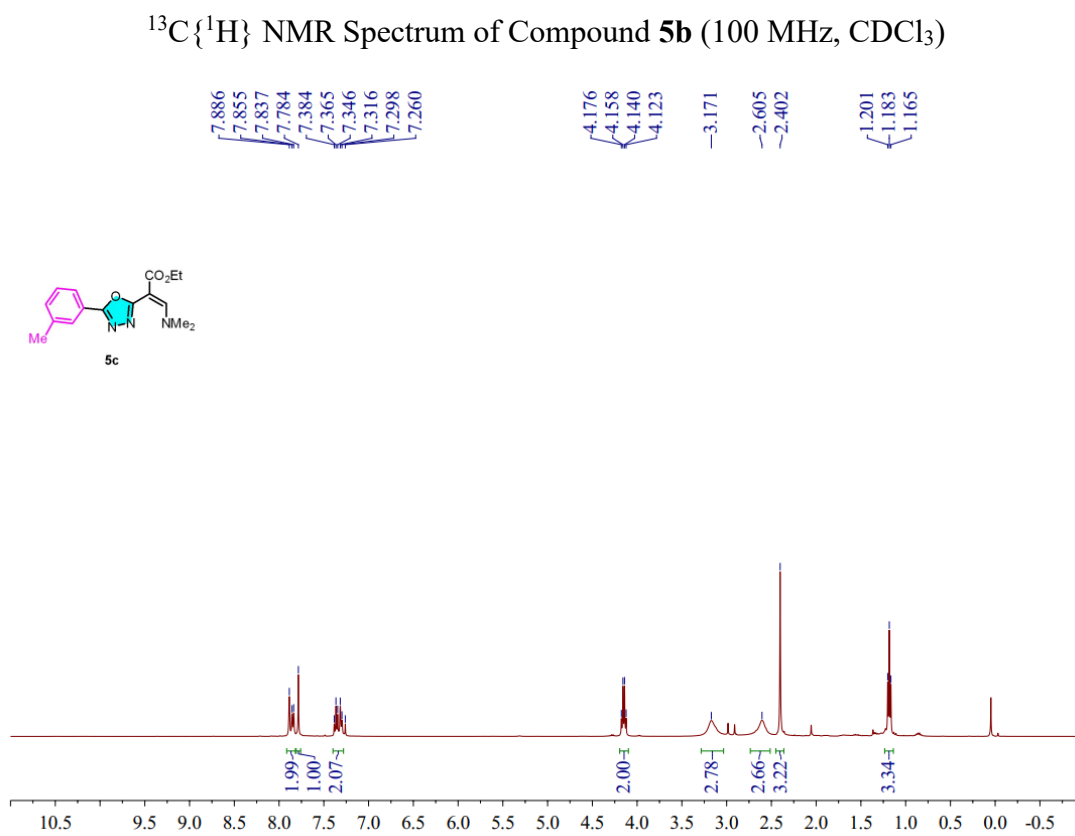

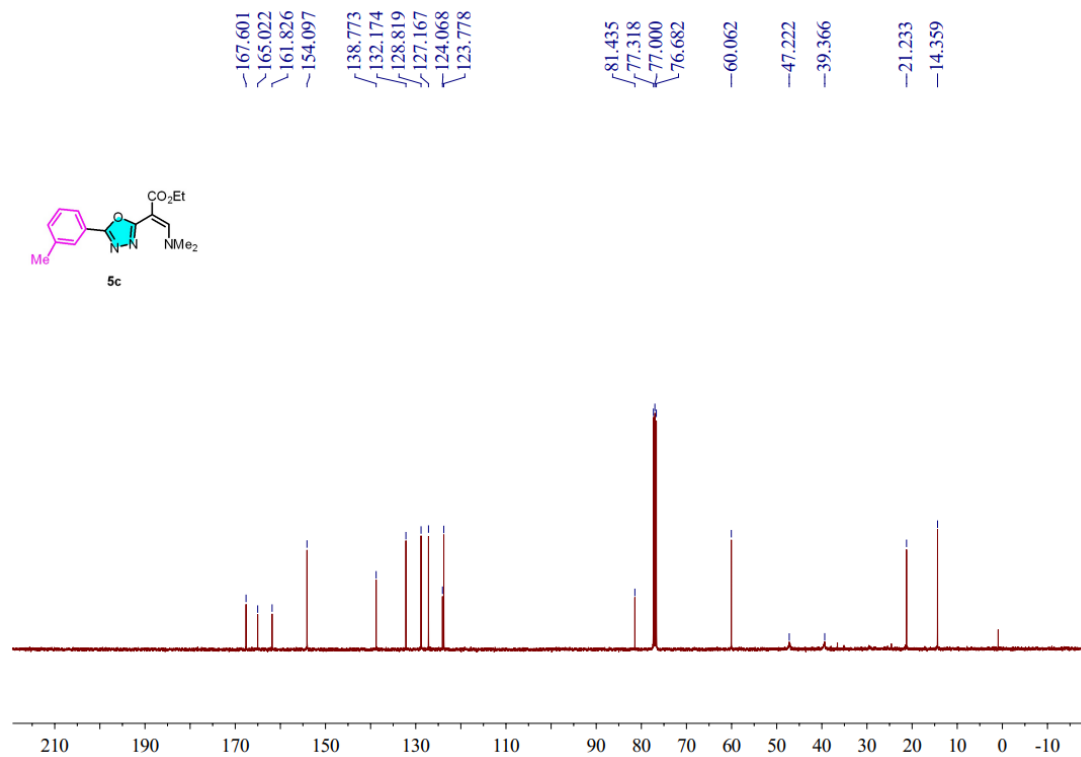

<sup>13</sup>C {<sup>1</sup>H} NMR Spectrum of Compound **5c** (100 MHz, CDCl<sub>3</sub>)

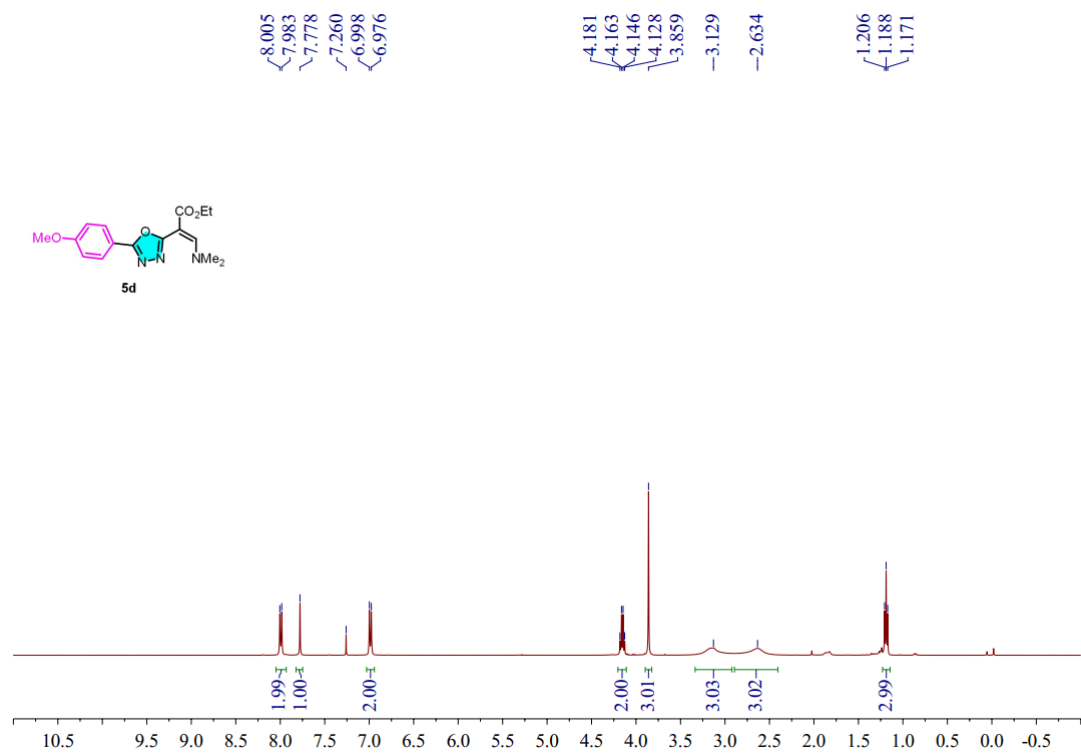

<sup>1</sup>H NMR Spectrum of Compound **5d** (400 MHz, CDCl<sub>3</sub>)

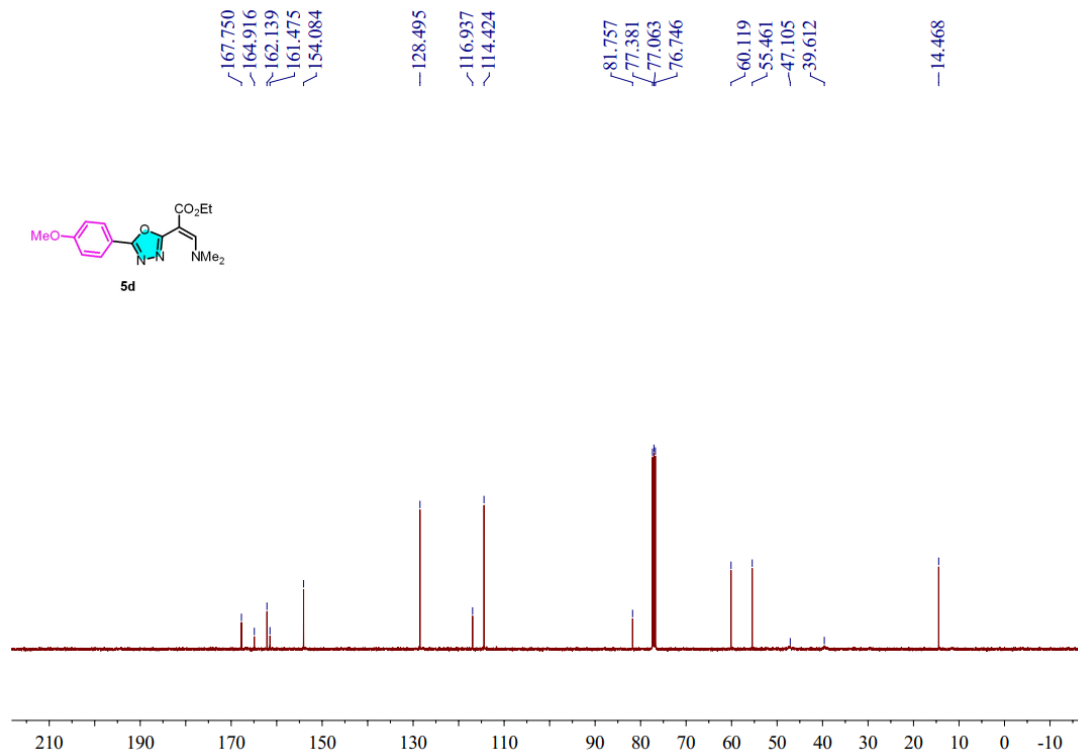

<sup>13</sup>C {<sup>1</sup>H} NMR Spectrum of Compound **5d** (100 MHz, CDCl<sub>3</sub>)

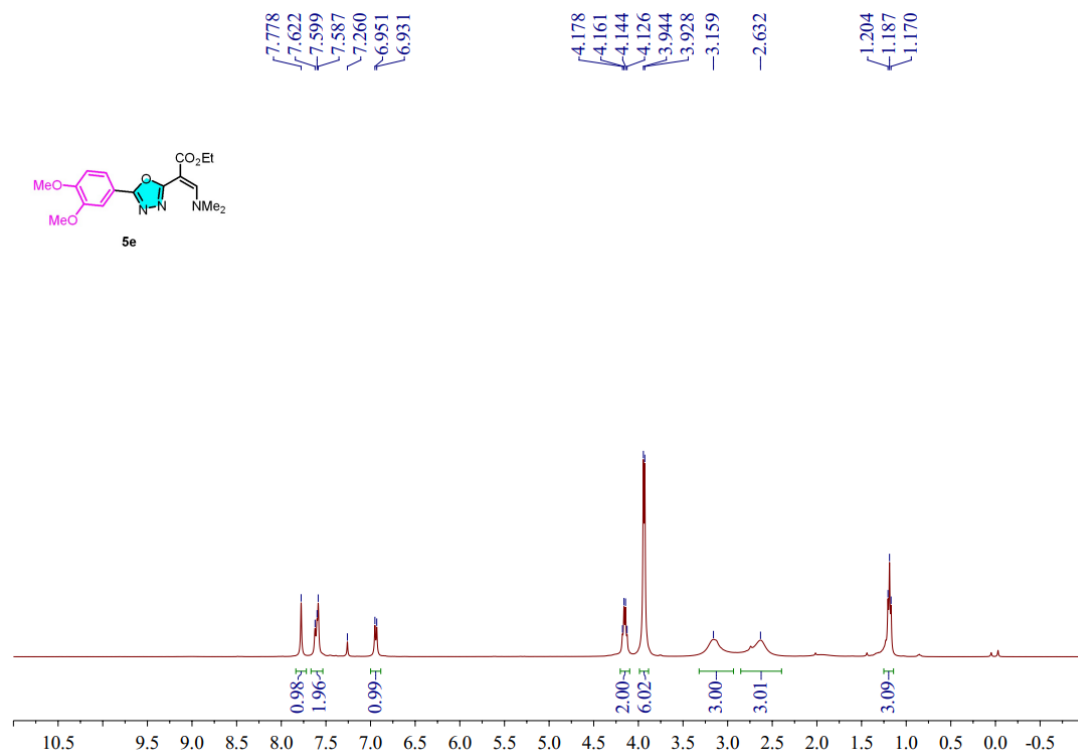

<sup>1</sup>H NMR Spectrum of Compound **5e** (400 MHz, CDCl<sub>3</sub>)

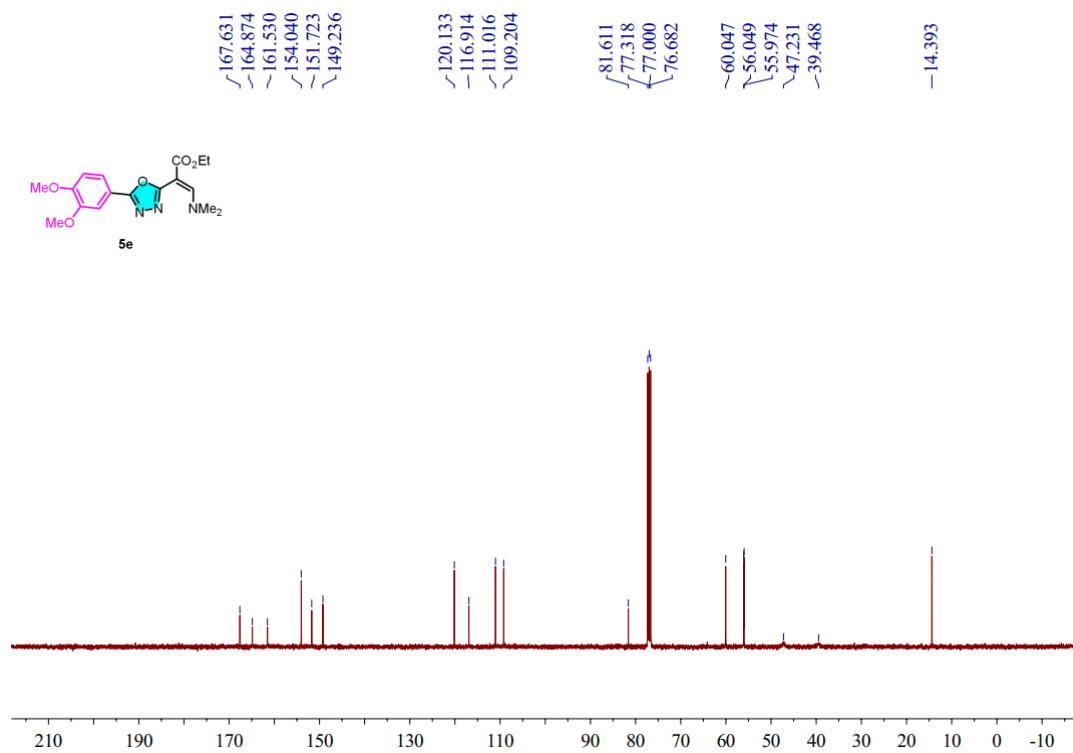

$^{13}\text{C}\{^1\text{H}\}$  NMR Spectrum of Compound **5e** (100 MHz,  $\text{CDCl}_3$ )

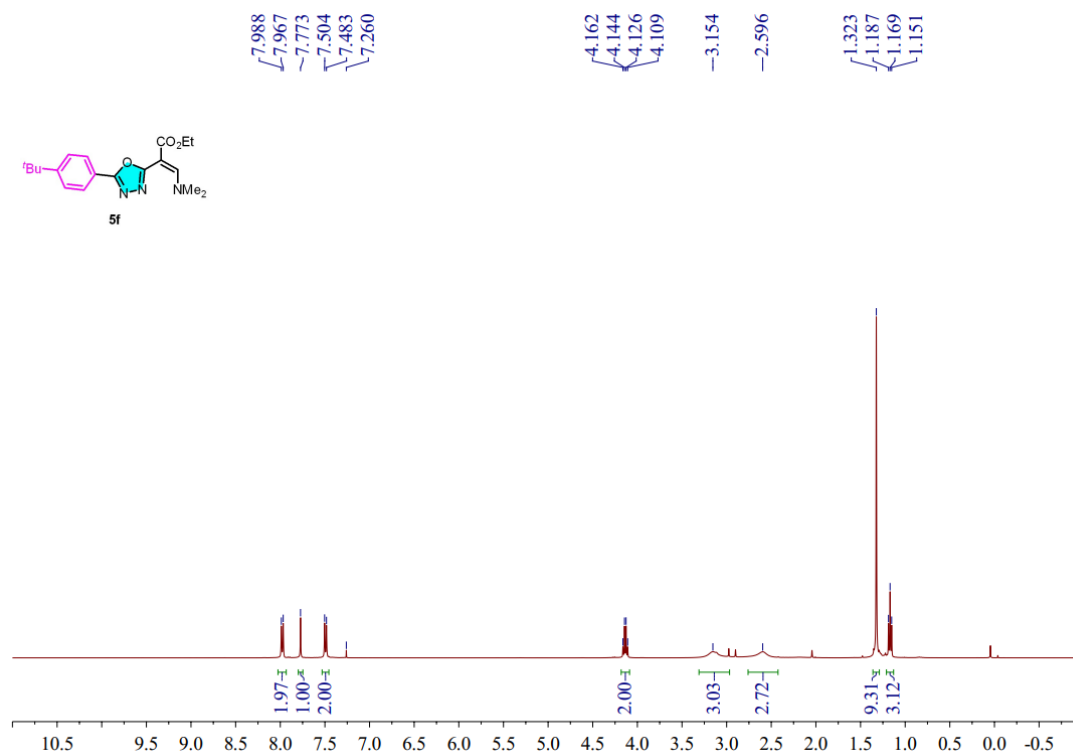

$^1\text{H}$  NMR Spectrum of Compound **5f** (400 MHz,  $\text{CDCl}_3$ )

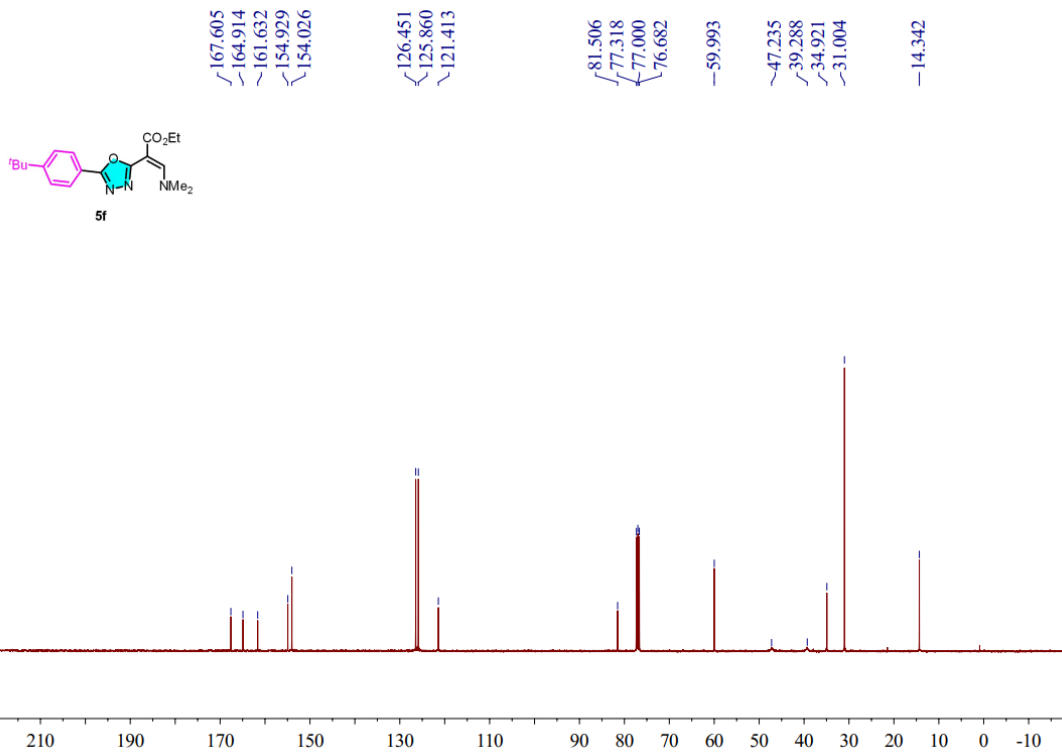

$^{13}\text{C}\{^1\text{H}\}$  NMR Spectrum of Compound **5f** (100 MHz,  $\text{CDCl}_3$ )

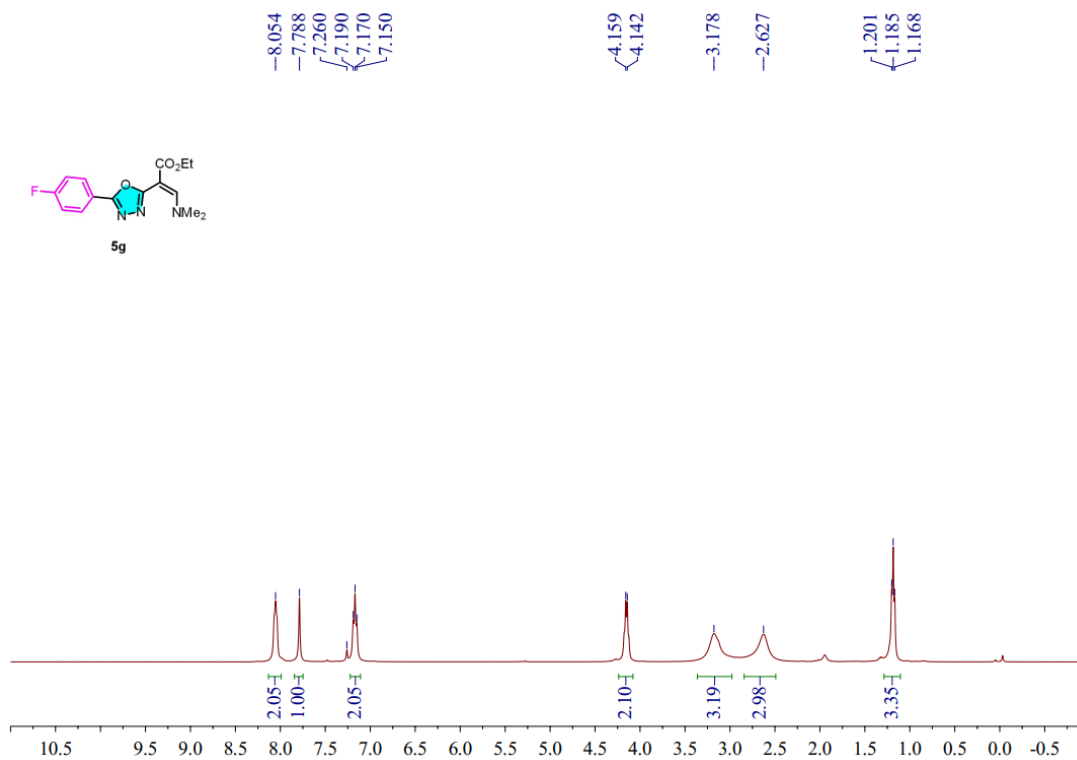

$^1\text{H}$  NMR Spectrum of Compound **5g** (400 MHz,  $\text{CDCl}_3$ )

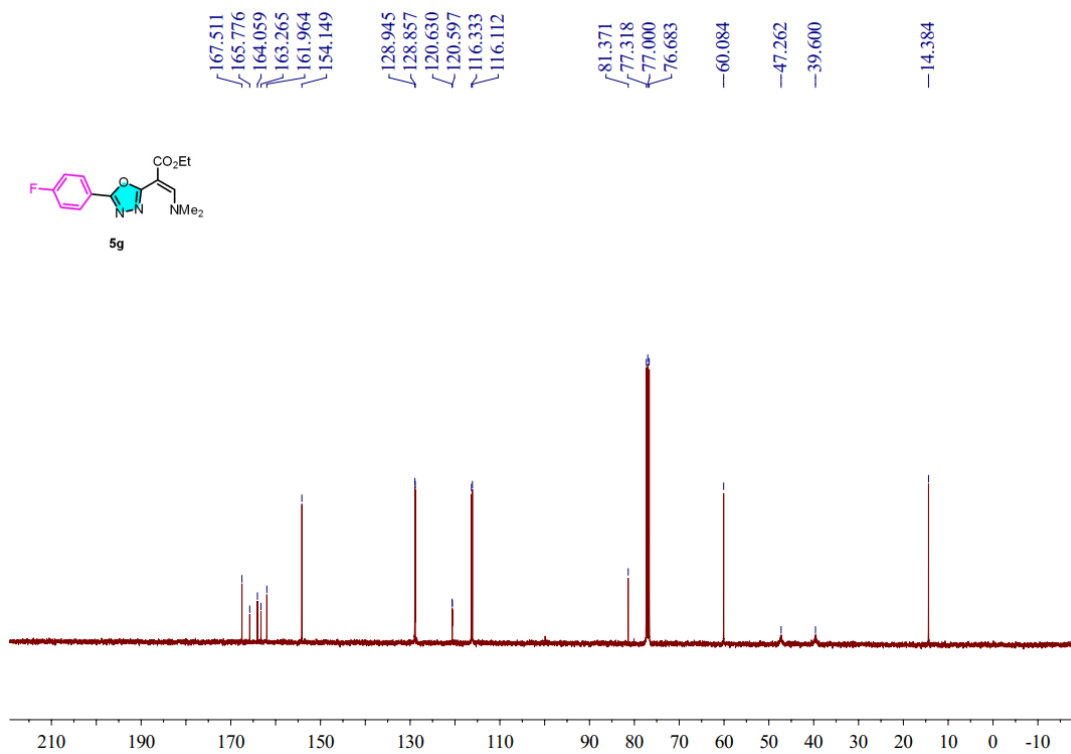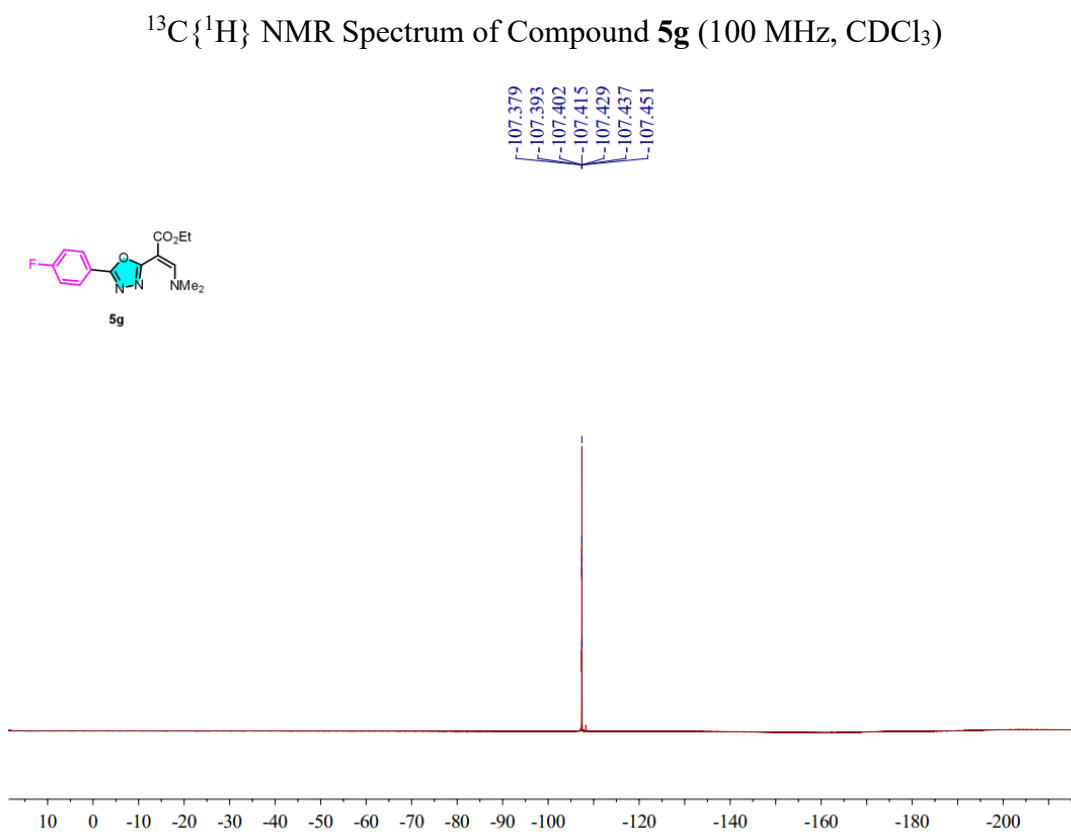

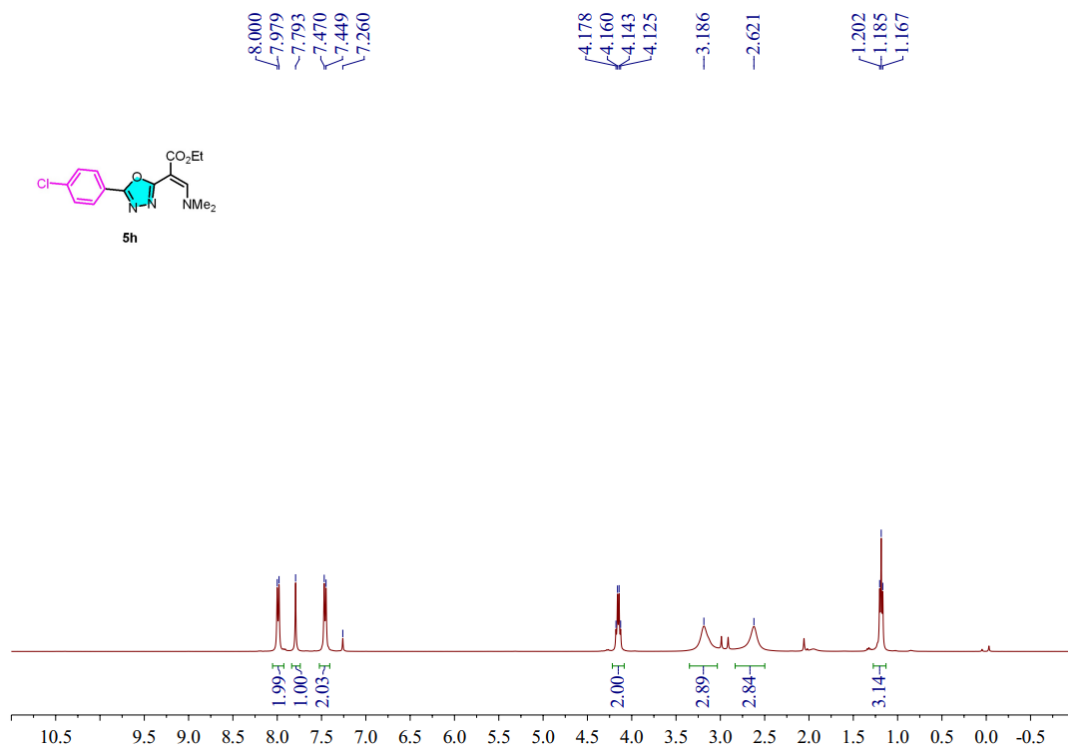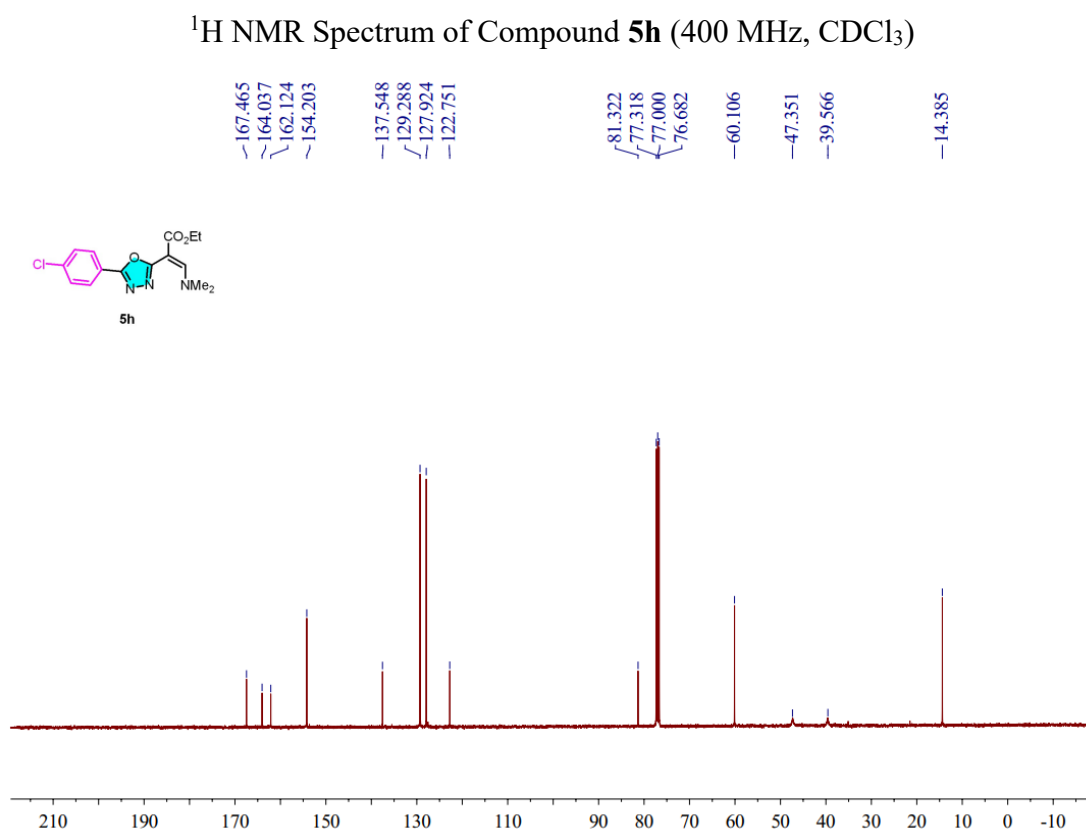



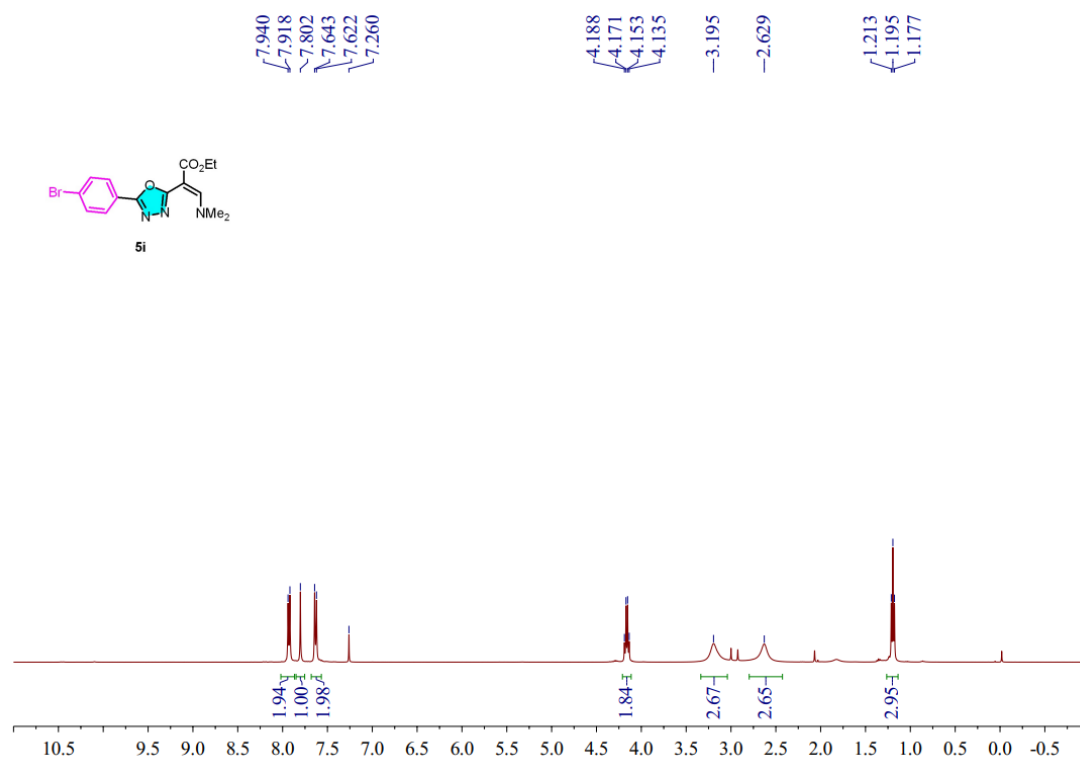

$^1\text{H}$  NMR Spectrum of Compound **5i** (400 MHz,  $\text{CDCl}_3$ )

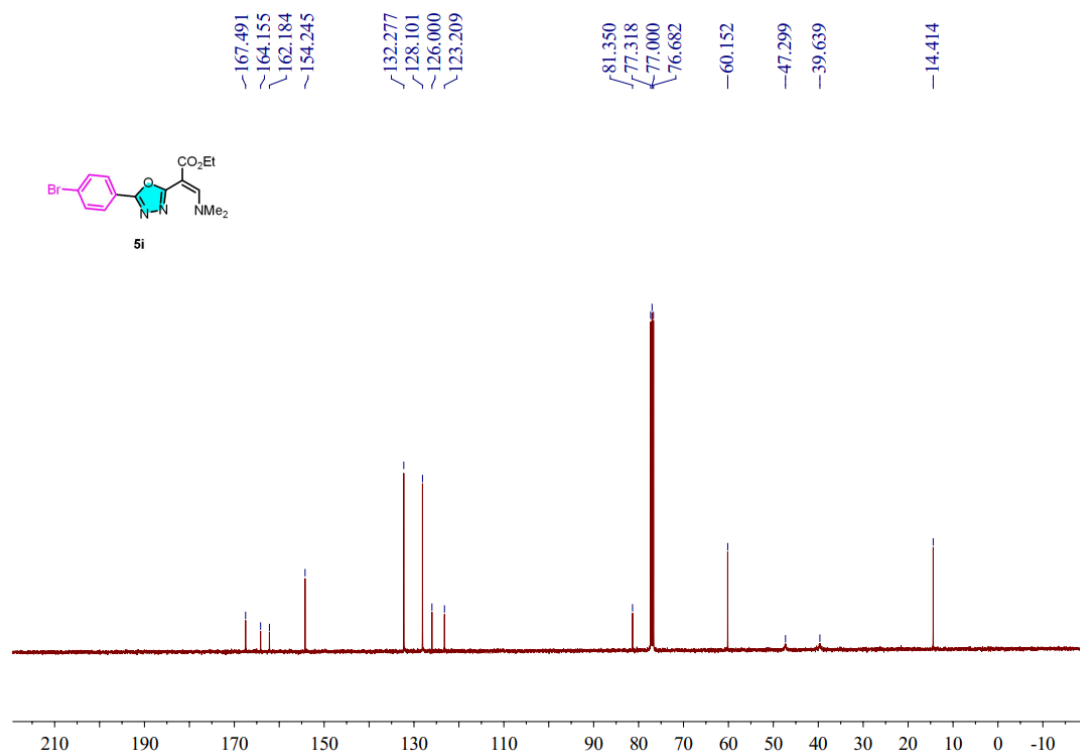

$^{13}\text{C}$  NMR Spectrum of Compound **5i** (100 MHz,  $\text{CDCl}_3$ )

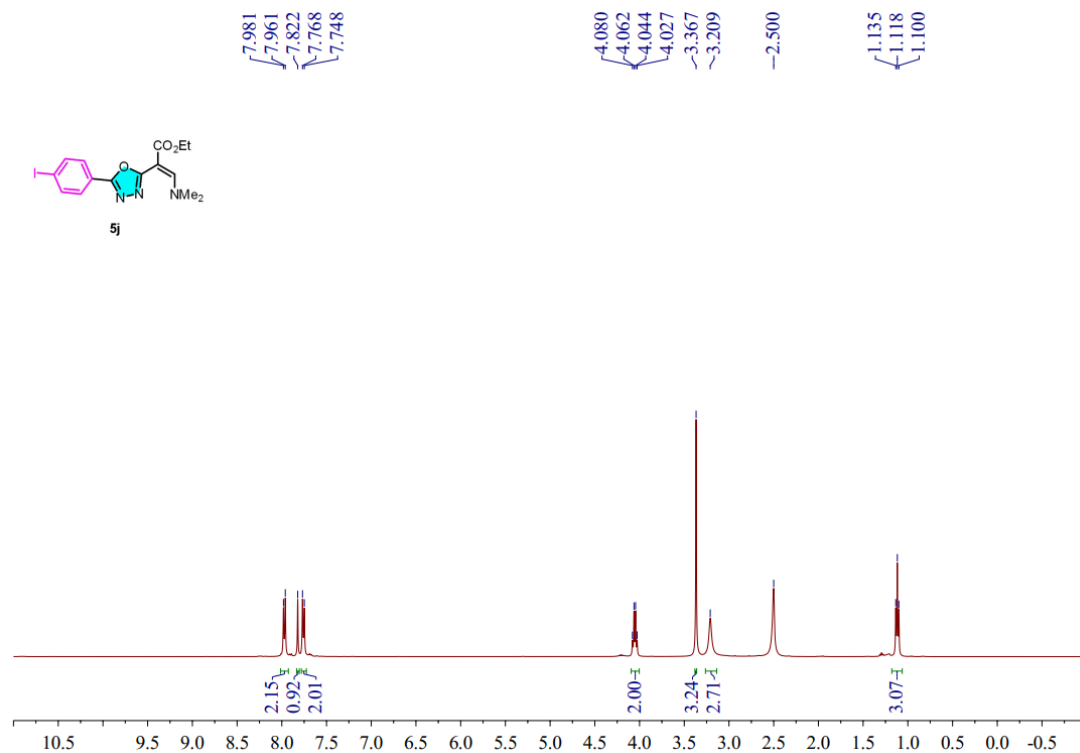

$^1\text{H}$  NMR Spectrum of Compound **5j** (400 MHz,  $\text{DMSO-}d_6$ )

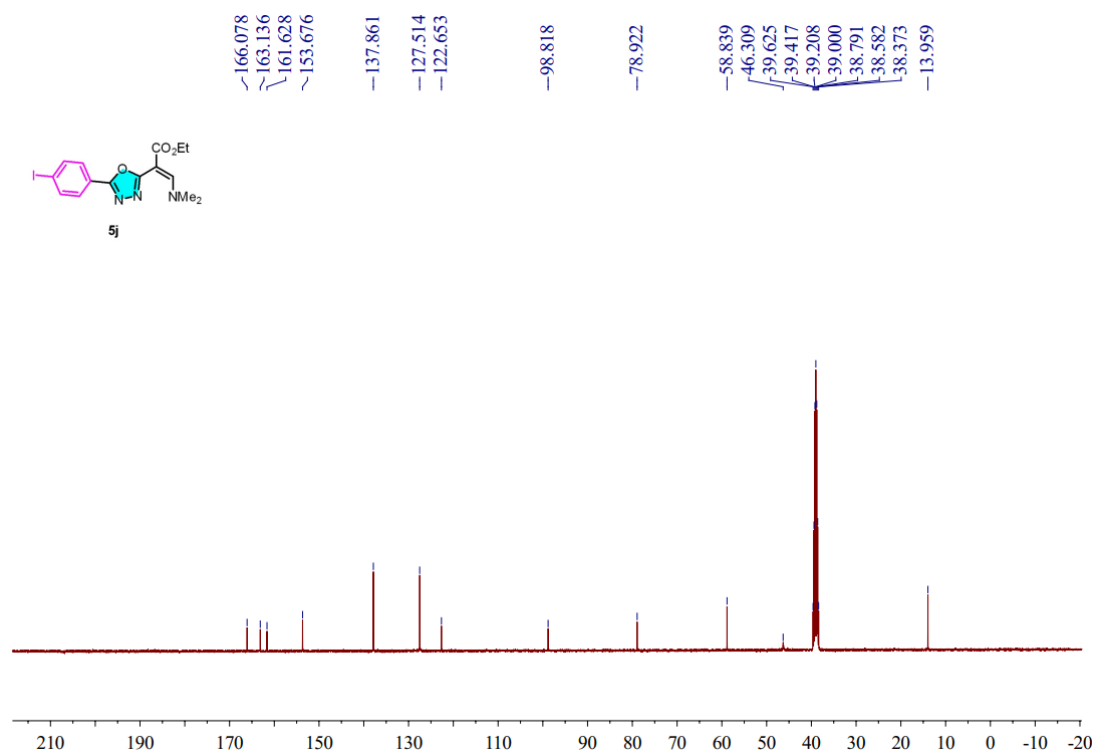

$^{13}\text{C}\{^1\text{H}\}$  NMR Spectrum of Compound **5j** (100 MHz,  $\text{DMSO-}d_6$ )

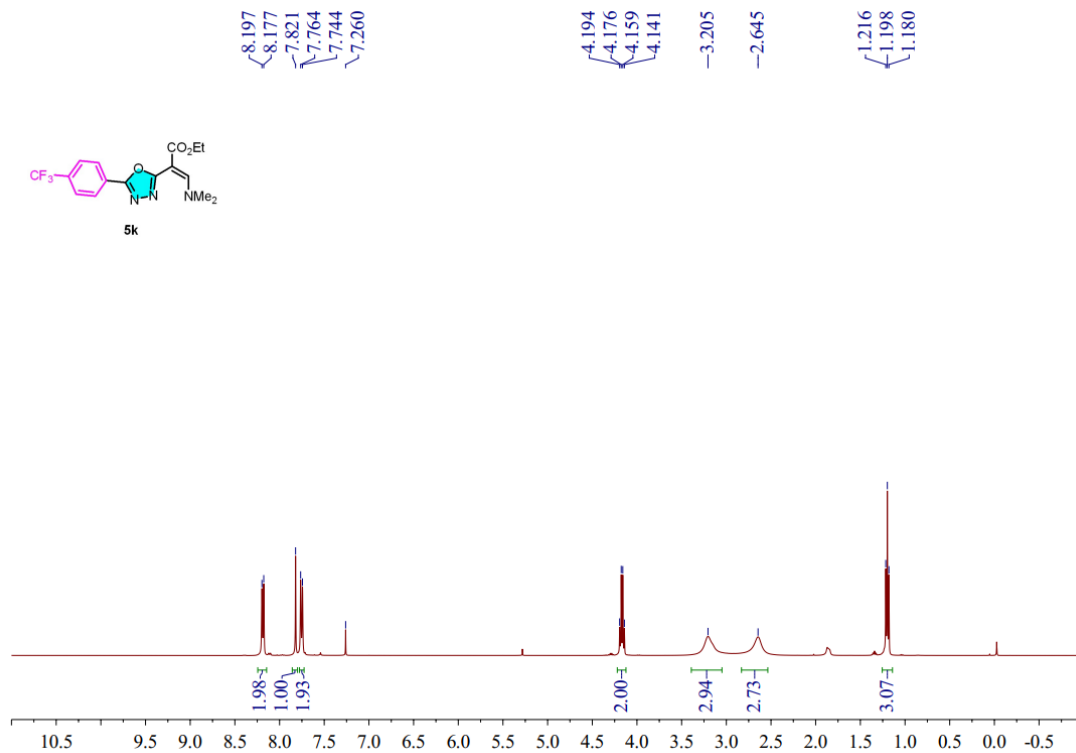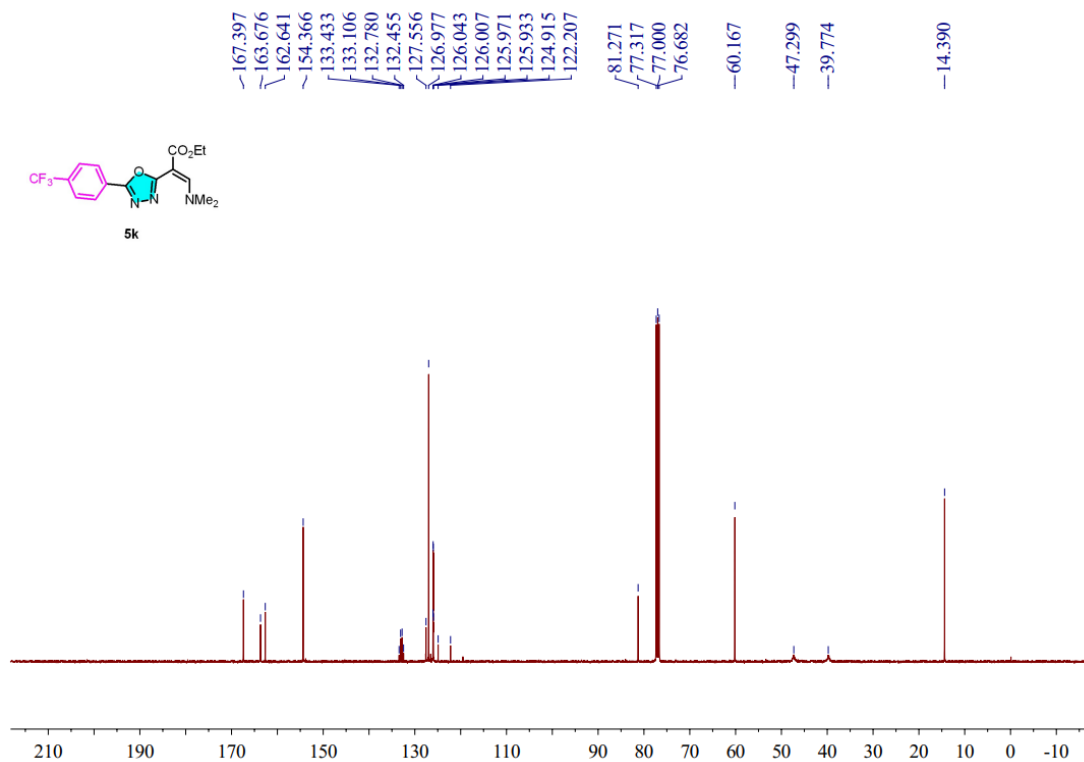

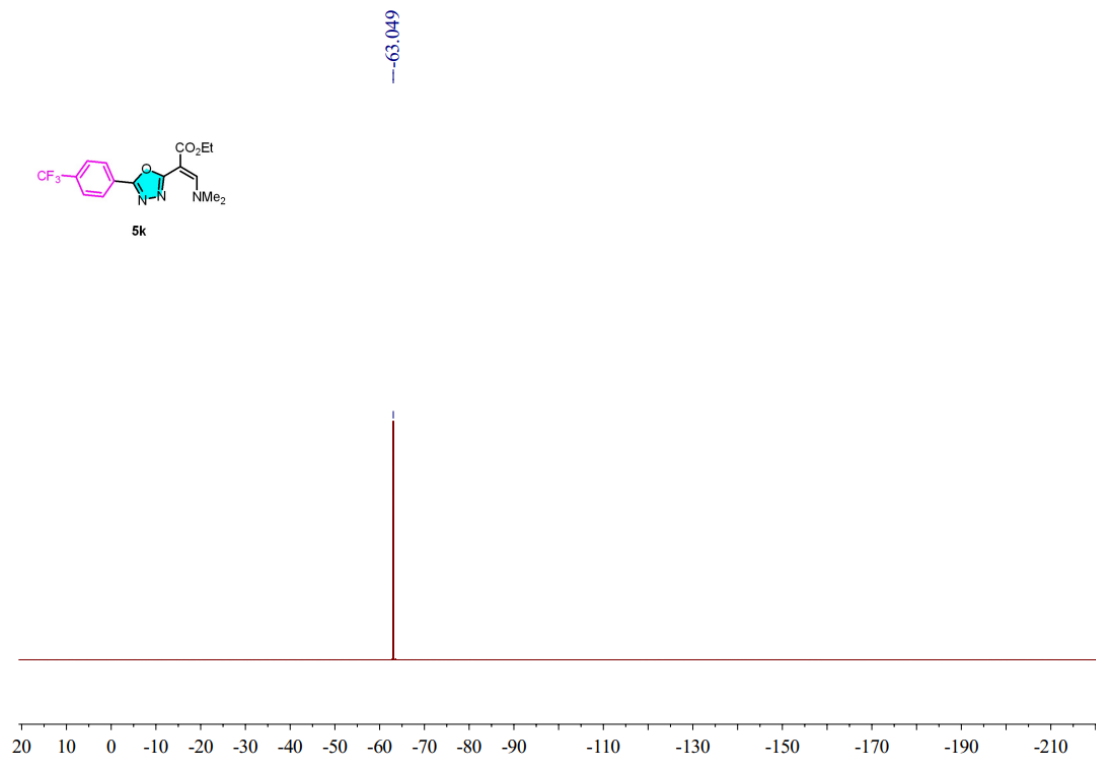

$^{19}\text{F}\{^1\text{H}\}$  NMR Spectrum of Compound **5k** (376 MHz,  $\text{CDCl}_3$ )

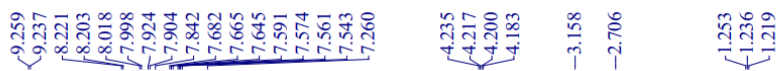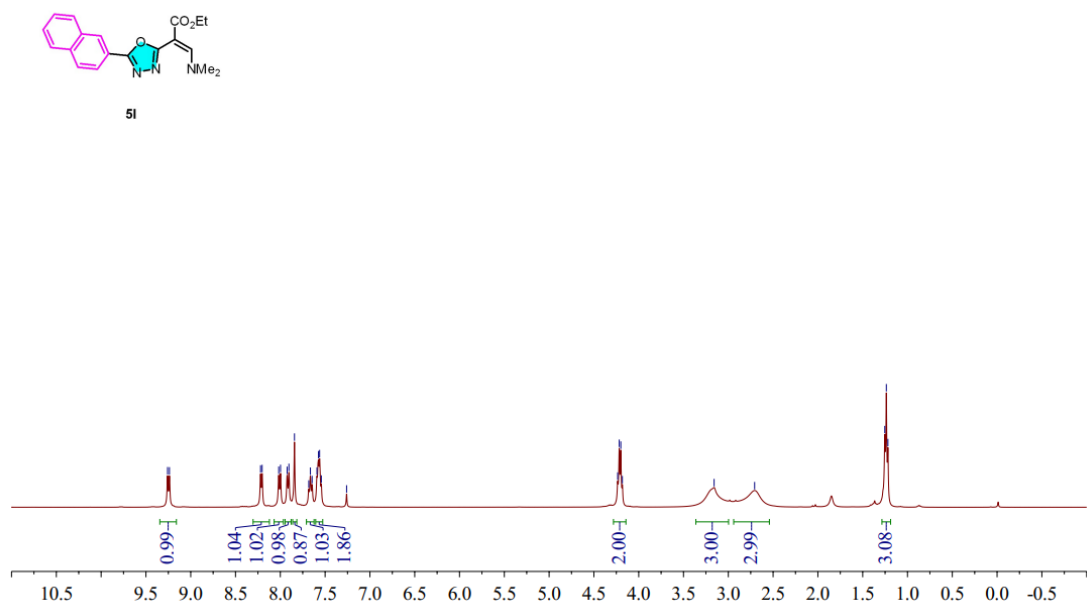

$^1\text{H}$  NMR Spectrum of Compound **5l** (400 MHz,  $\text{CDCl}_3$ )

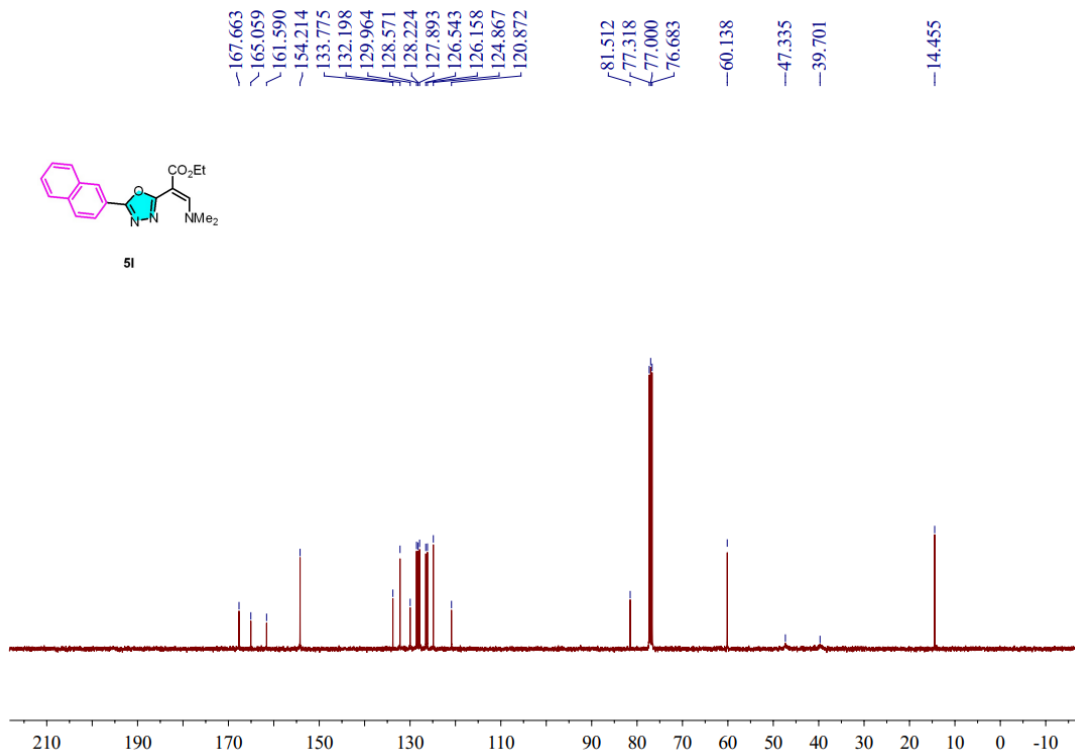

$^{13}\text{C}\{^1\text{H}\}$  NMR Spectrum of Compound **5l** (100 MHz,  $\text{CDCl}_3$ )

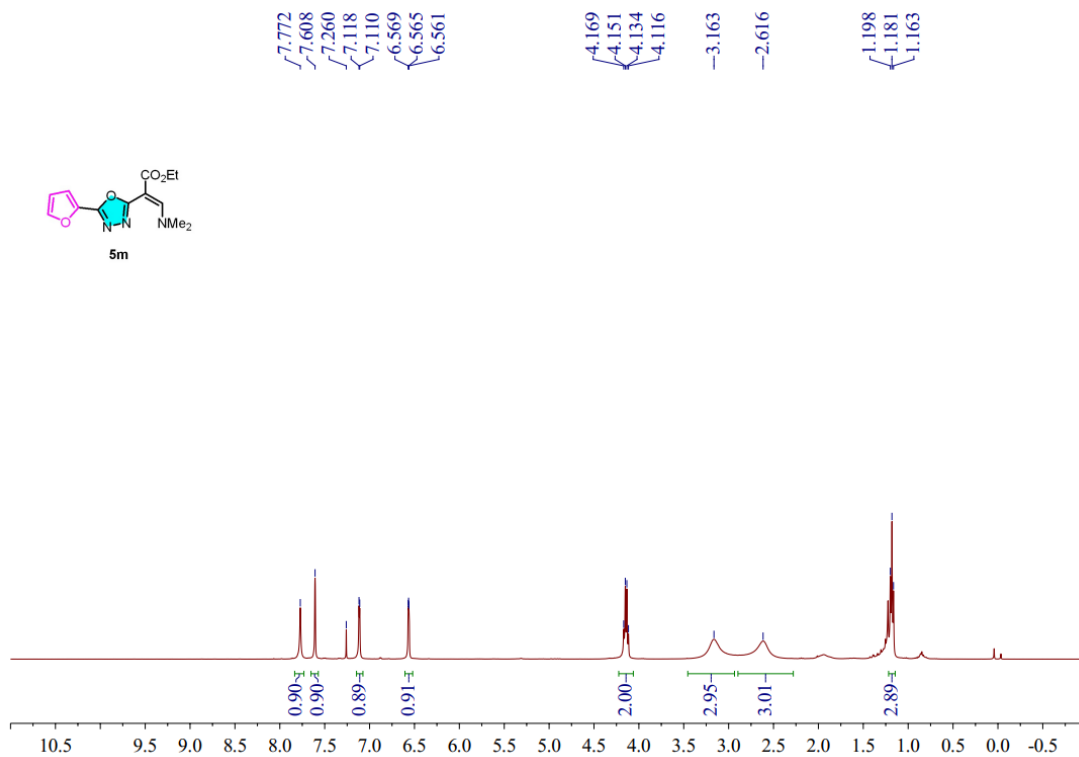

$^1\text{H}$  NMR Spectrum of Compound **5m** (400 MHz,  $\text{CDCl}_3$ )

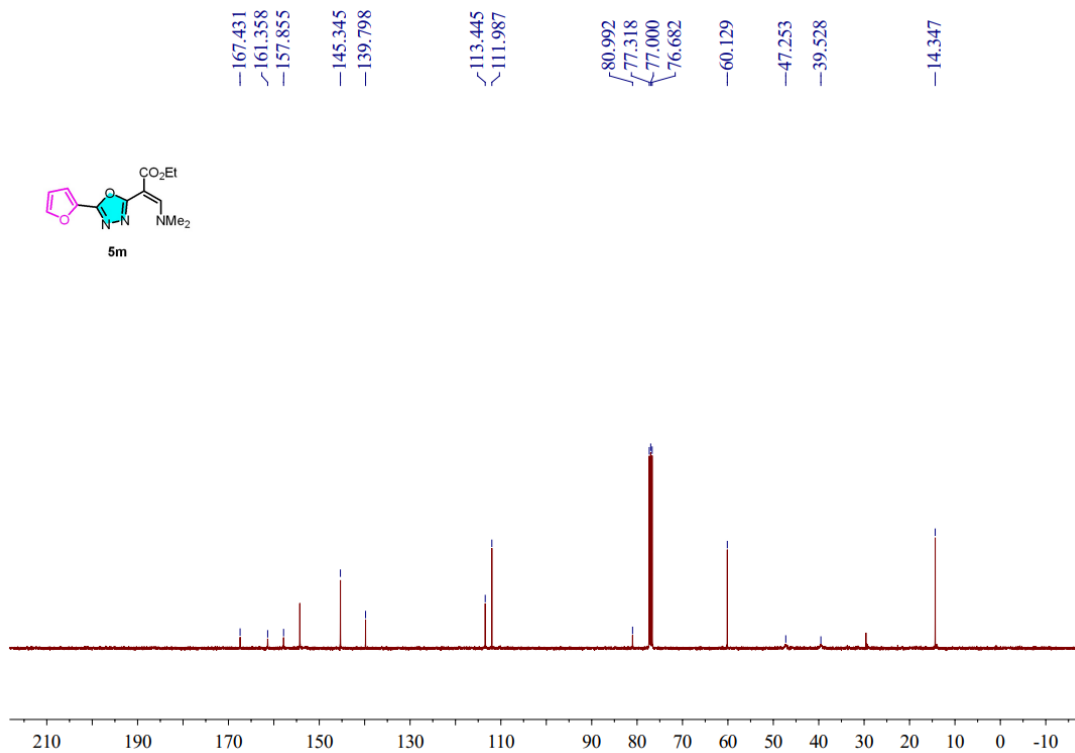

<sup>13</sup>C{<sup>1</sup>H} NMR Spectrum of Compound **5m** (100 MHz, CDCl<sub>3</sub>)

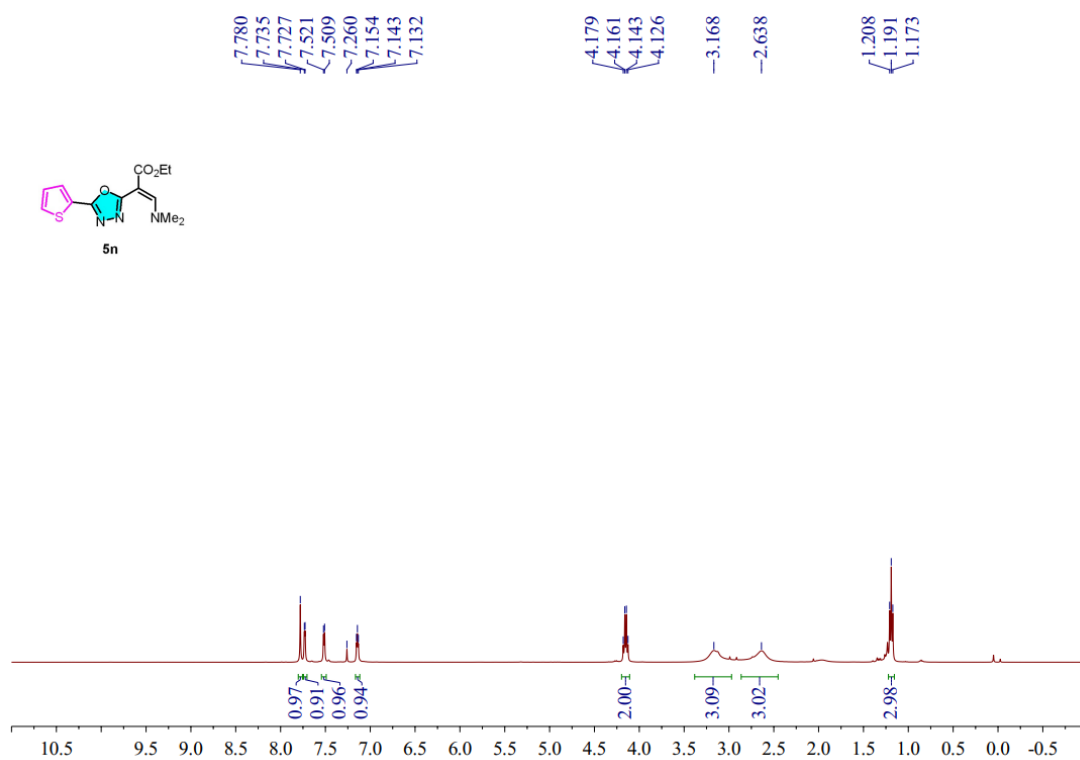

<sup>1</sup>H NMR Spectrum of Compound **5n** (400 MHz, CDCl<sub>3</sub>)

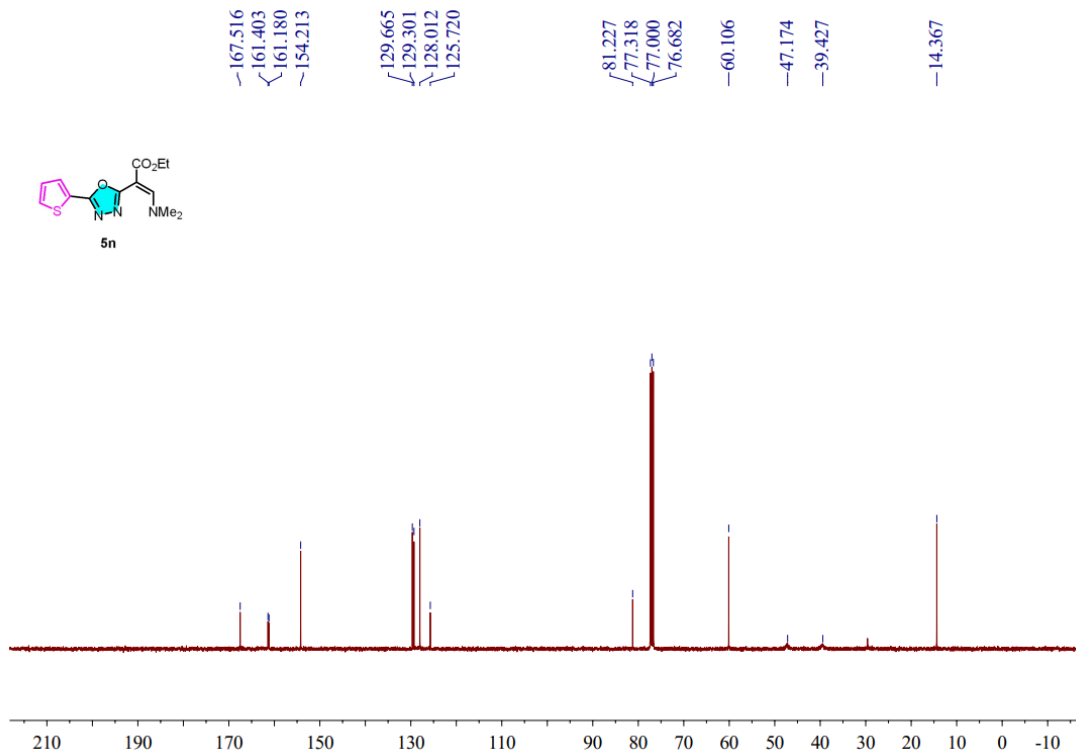

$^{13}\text{C}\{^1\text{H}\}$  NMR Spectrum of Compound **5n** (100 MHz,  $\text{CDCl}_3$ )

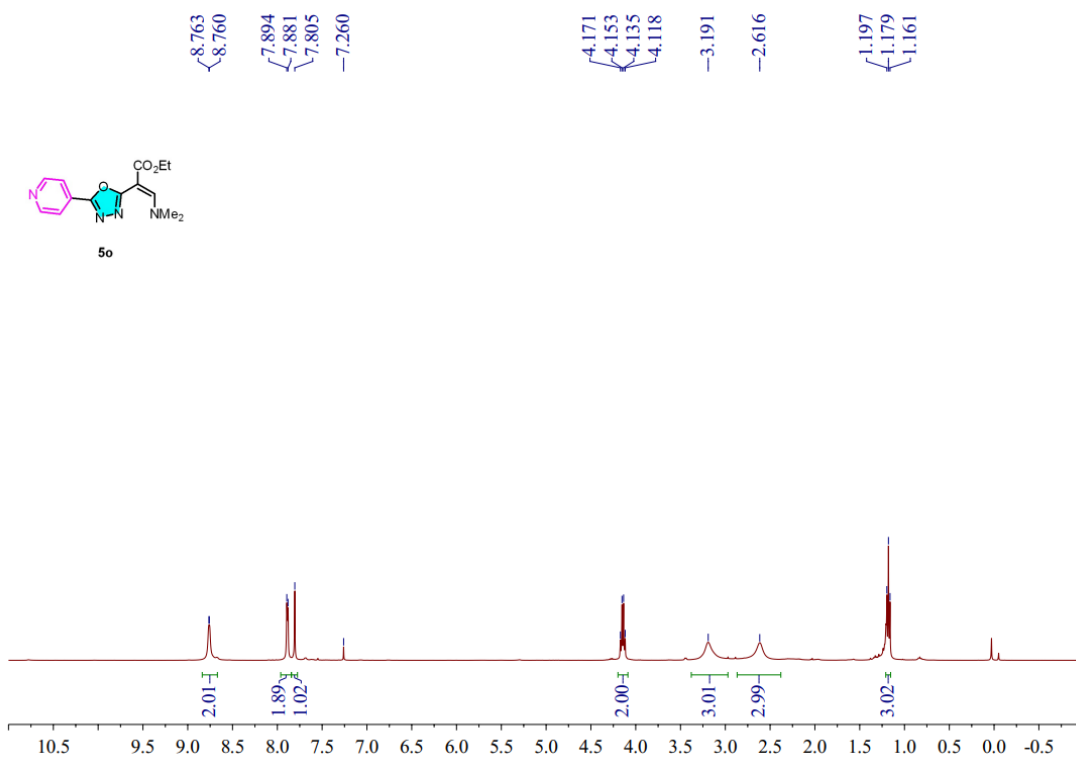

$^1\text{H}$  NMR Spectrum of Compound **5o** (400 MHz,  $\text{CDCl}_3$ )

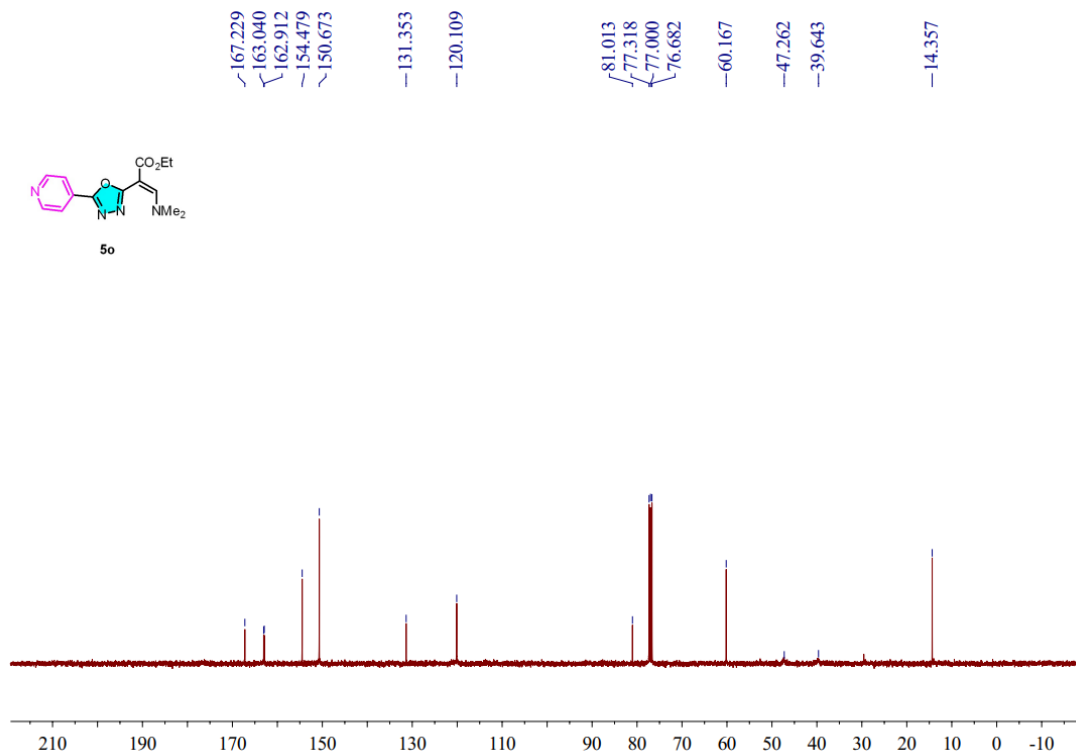

$^{13}\text{C}\{^1\text{H}\}$  NMR Spectrum of Compound **5o** (100 MHz,  $\text{CDCl}_3$ )

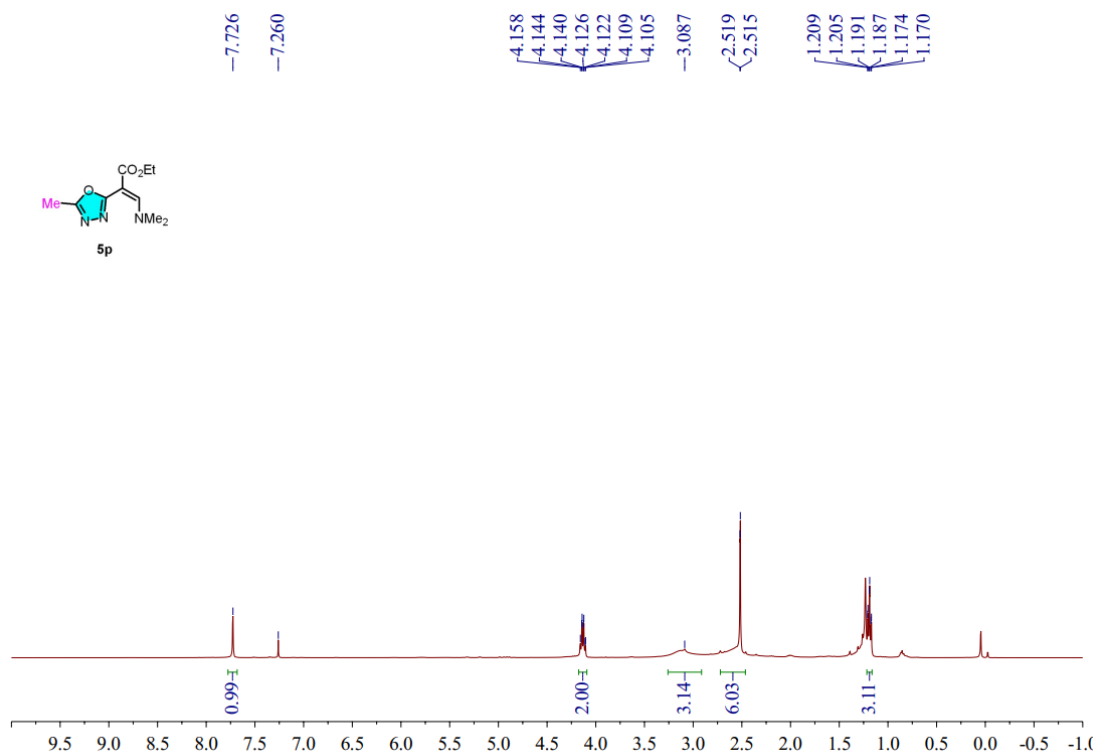

$^1\text{H}$  NMR Spectrum of Compound **5p** (400 MHz,  $\text{CDCl}_3$ )



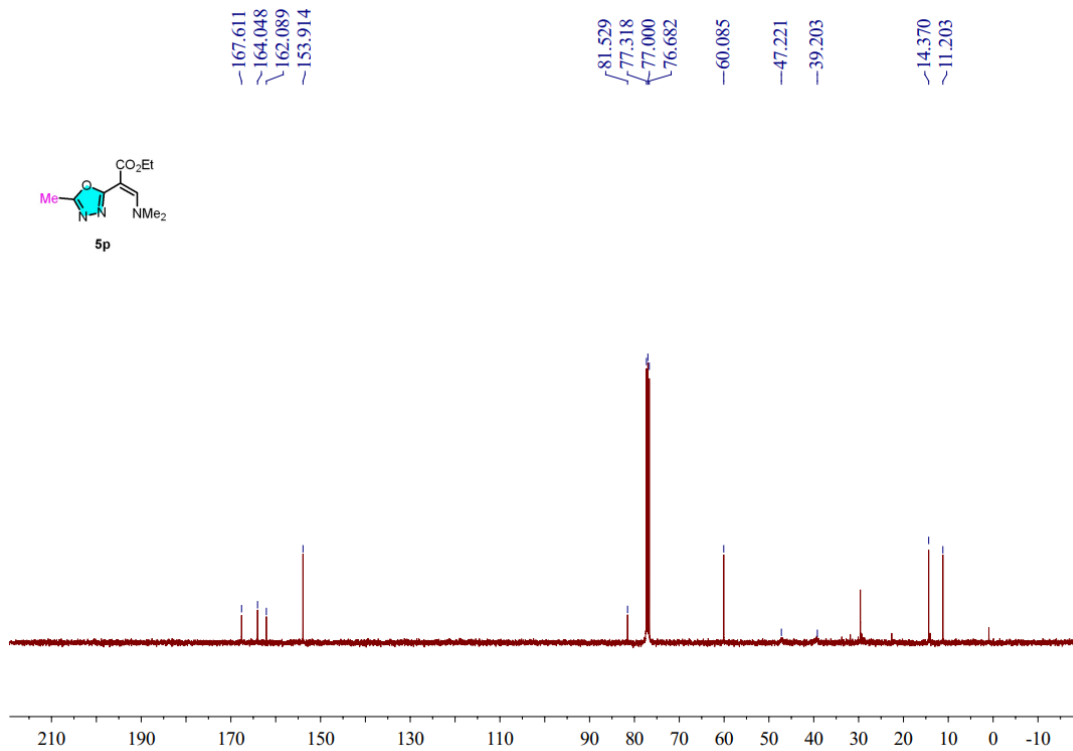

$^{13}\text{C}\{^1\text{H}\}$  NMR Spectrum of Compound **5p** (100 MHz,  $\text{CDCl}_3$ )

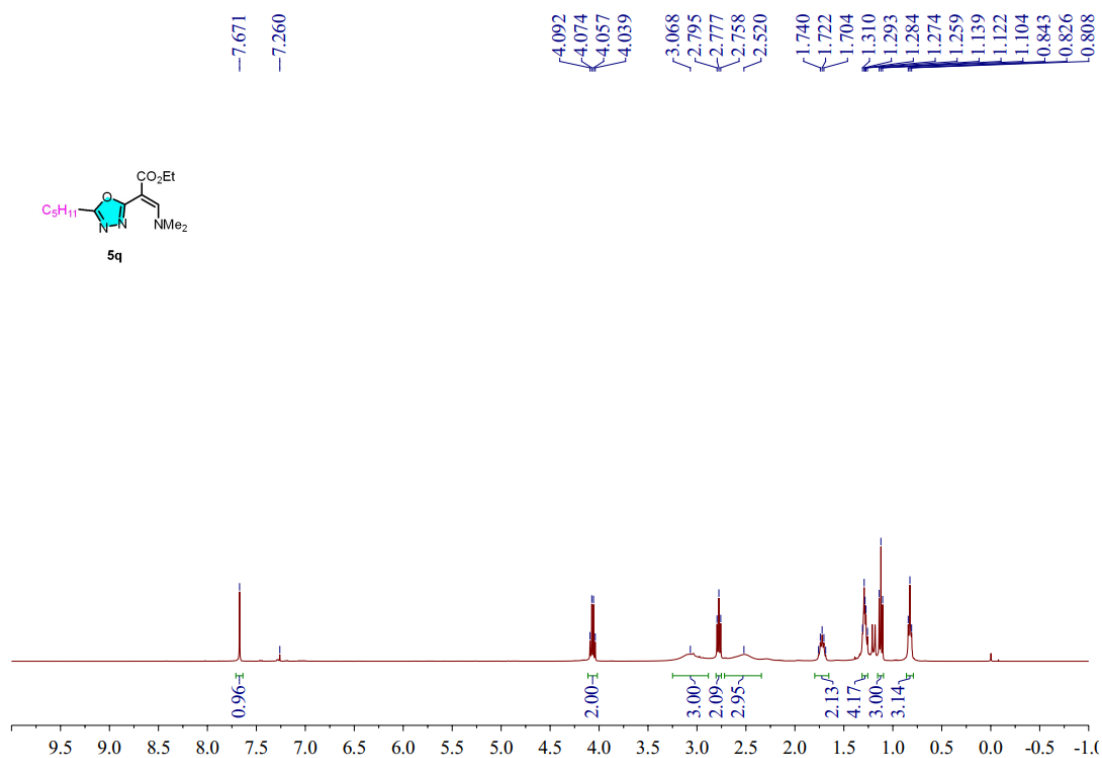

$^1\text{H}$  NMR Spectrum of Compound **5q** (400 MHz,  $\text{CDCl}_3$ )

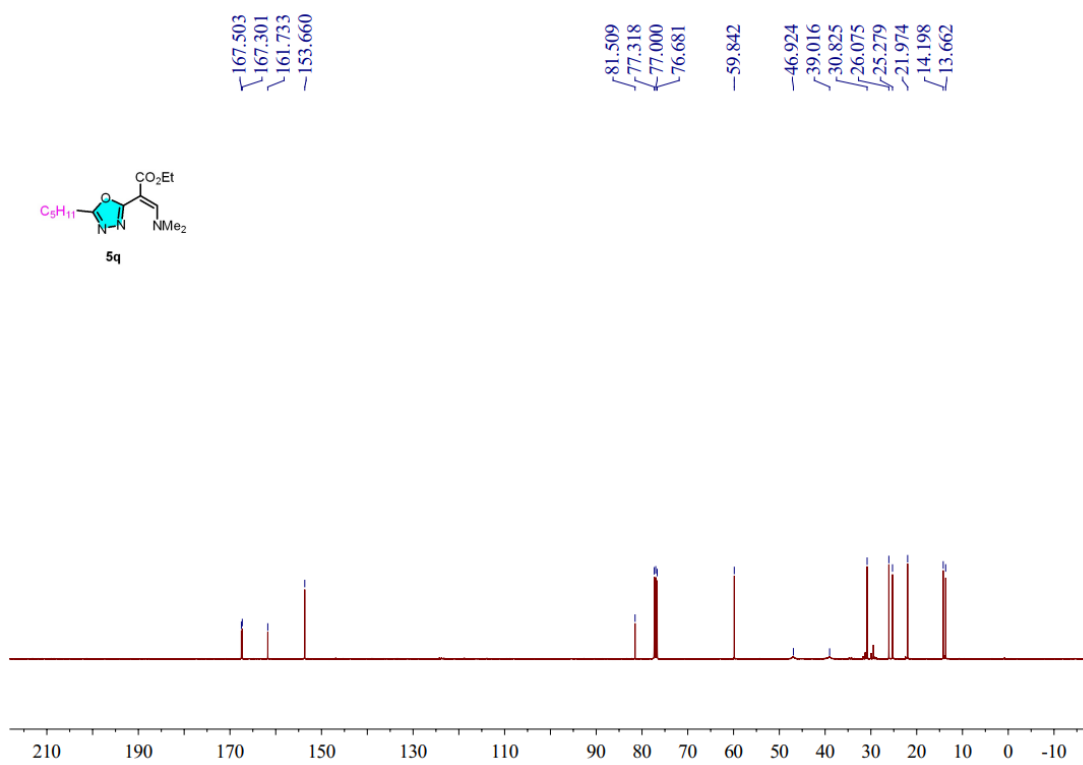

<sup>13</sup>C {<sup>1</sup>H} NMR Spectrum of Compound **5q** (100 MHz, CDCl<sub>3</sub>)

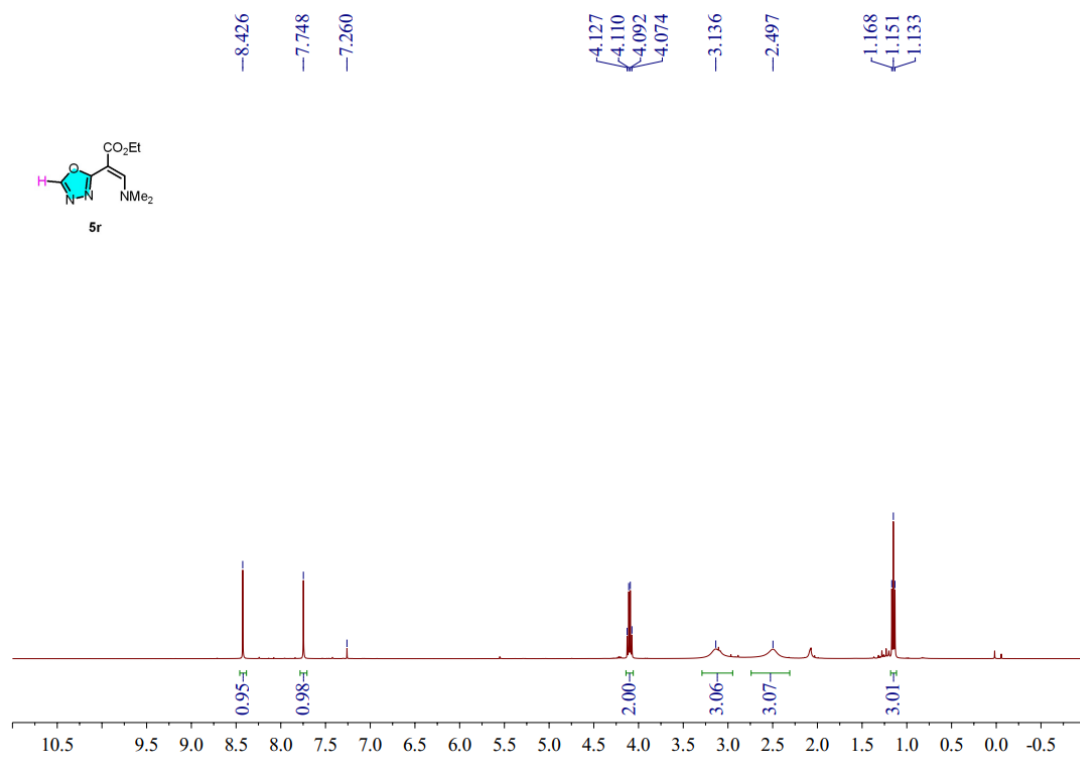

<sup>1</sup>H NMR Spectrum of Compound **5r** (400 MHz, CDCl<sub>3</sub>)

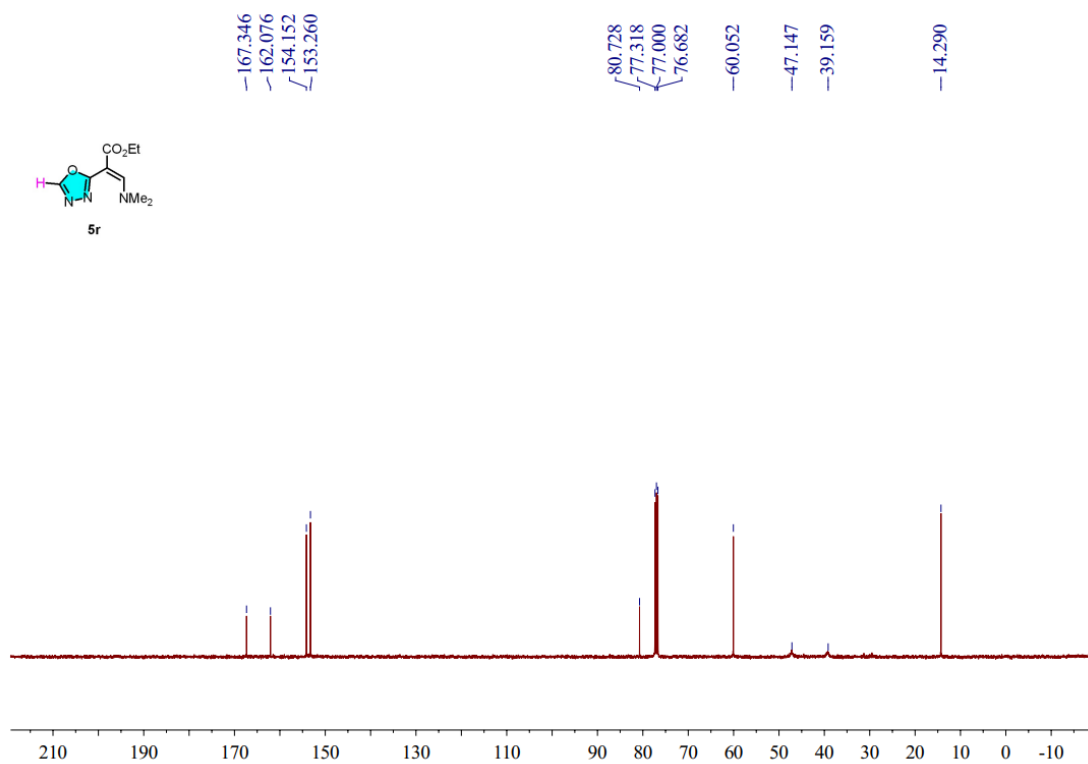

<sup>13</sup>C {<sup>1</sup>H} NMR Spectrum of Compound **5r** (100 MHz, CDCl<sub>3</sub>)

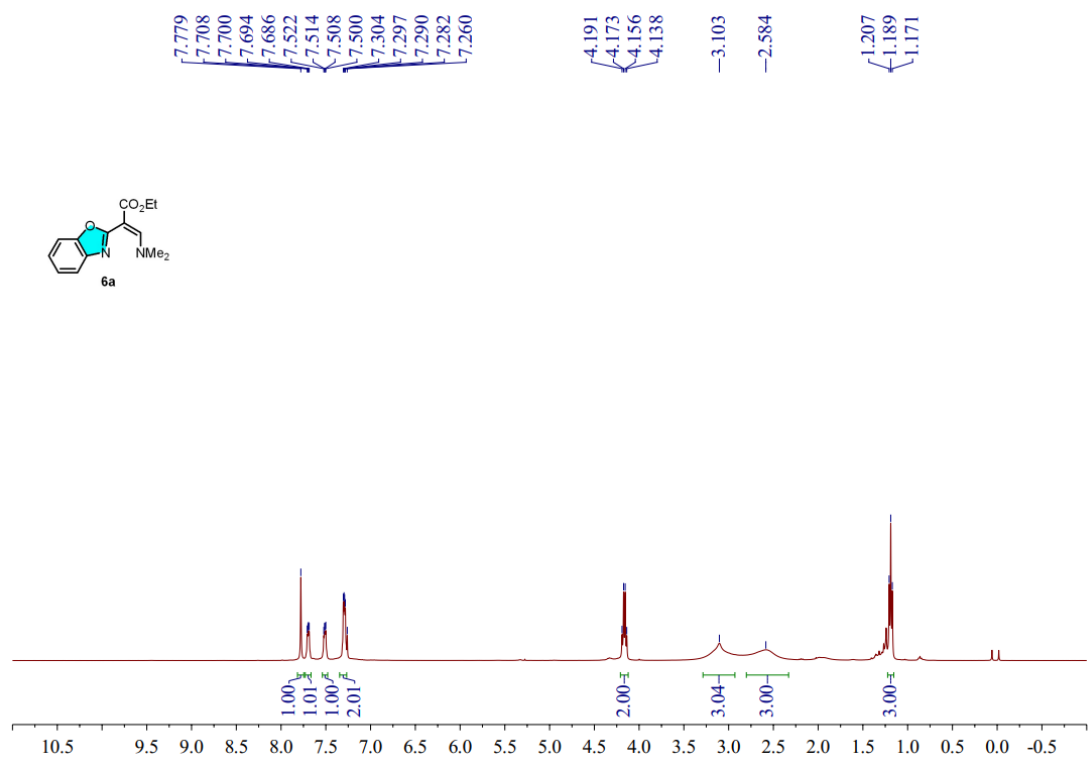

<sup>1</sup>H NMR Spectrum of Compound **6a** (400 MHz, CDCl<sub>3</sub>)

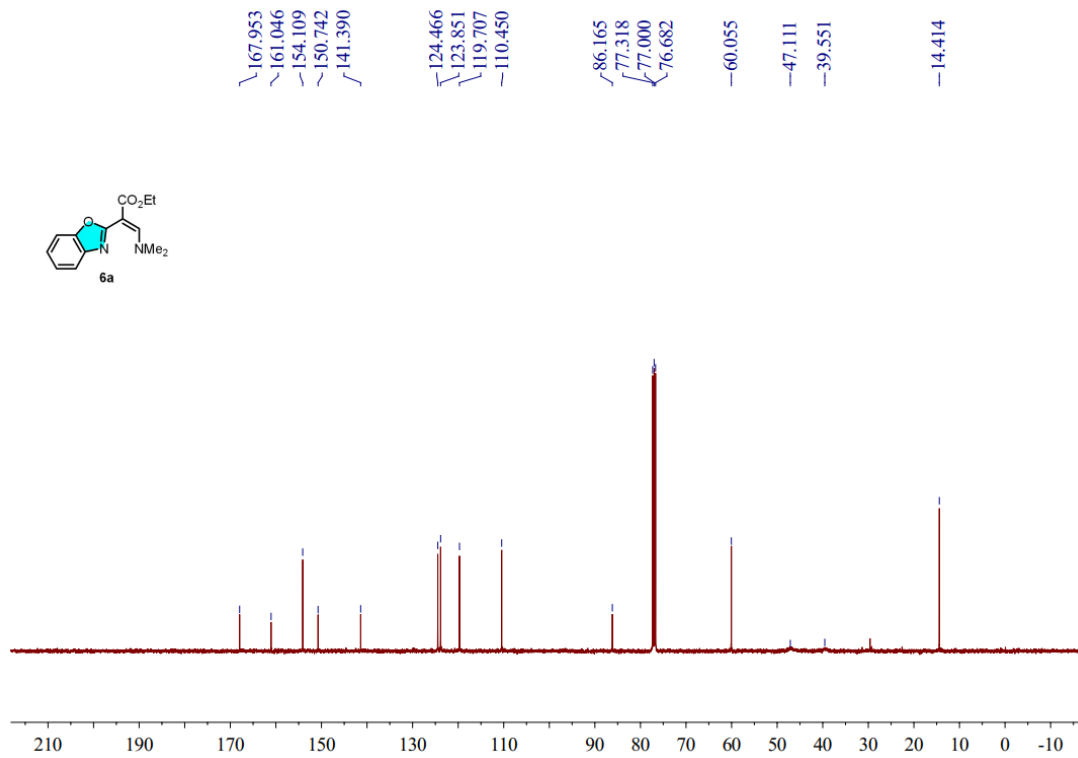

$^{13}\text{C}\{^1\text{H}\}$  NMR Spectrum of Compound **6a** (100 MHz,  $\text{CDCl}_3$ )

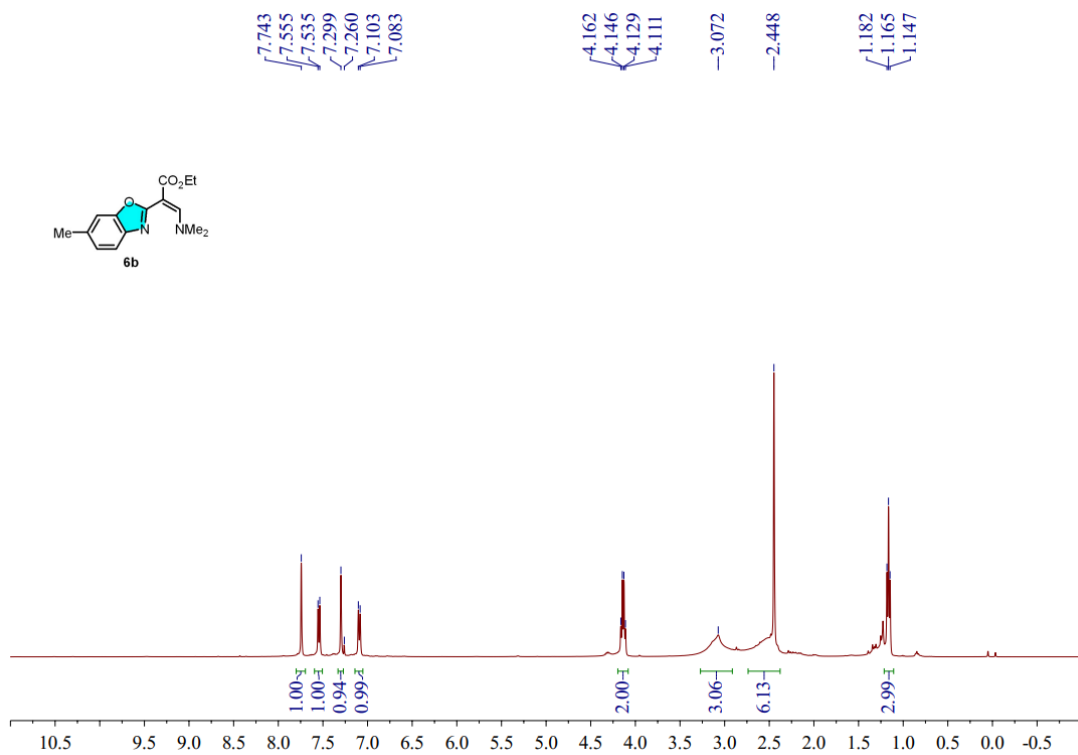

$^1\text{H}$  NMR Spectrum of Compound **6b** (400 MHz,  $\text{CDCl}_3$ )

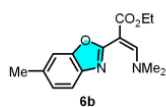

$\delta$  167.973  
 $\delta$  160.365  
 $\delta$  153.886  
 $\delta$  150.952  
 $\delta$  139.081  
 $\delta$  134.778  
 $\delta$  124.990  
 $\delta$  118.997  
 $\delta$  110.569  
 $\delta$  86.137  
 $\delta$  77.318  
 $\delta$  77.000  
 $\delta$  76.682  
 $\delta$  59.930  
 $\delta$  46.842  
 $\delta$  39.201  
 $\delta$  21.573  
 $\delta$  14.344

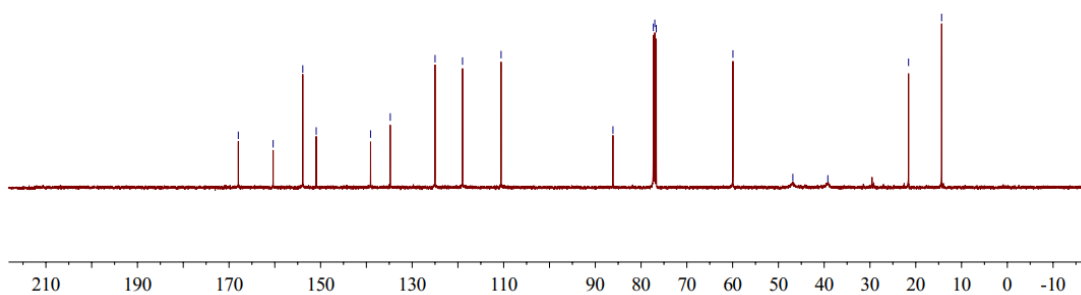

$^{13}\text{C}\{^1\text{H}\}$  NMR Spectrum of Compound **6b** (100 MHz,  $\text{CDCl}_3$ )

$\delta$  7.766  
 $\delta$  7.655  
 $\delta$  7.542  
 $\delta$  7.521  
 $\delta$  7.406  
 $\delta$  7.385  
 $\delta$  7.260  
 $\delta$  4.171  
 $\delta$  4.154  
 $\delta$  4.136  
 $\delta$  4.118  
 $\delta$  3.095  
 $\delta$  2.545  
 $\delta$  1.191  
 $\delta$  1.174  
 $\delta$  1.156

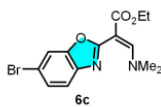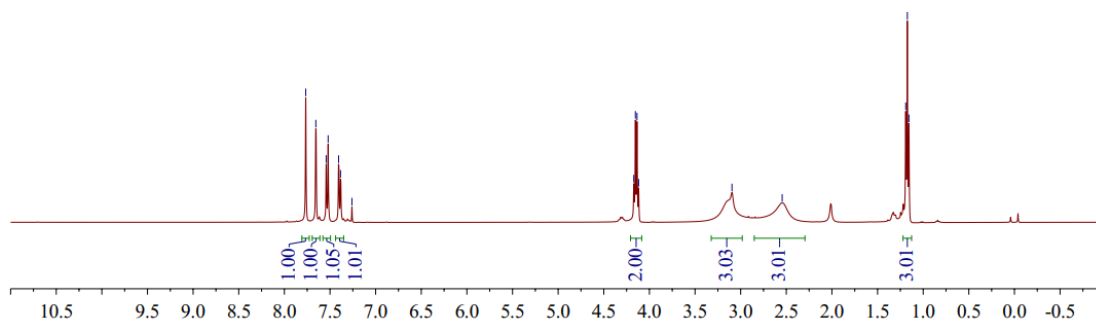

$^1\text{H}$  NMR Spectrum of Compound **6c** (400 MHz,  $\text{CDCl}_3$ )

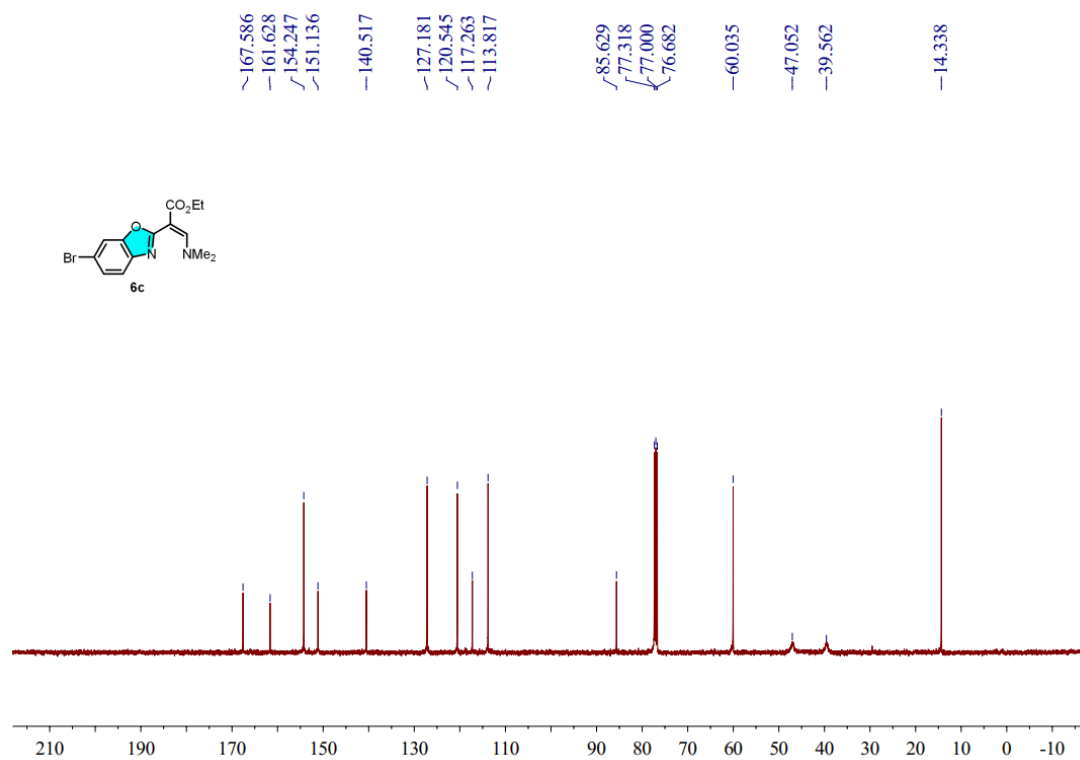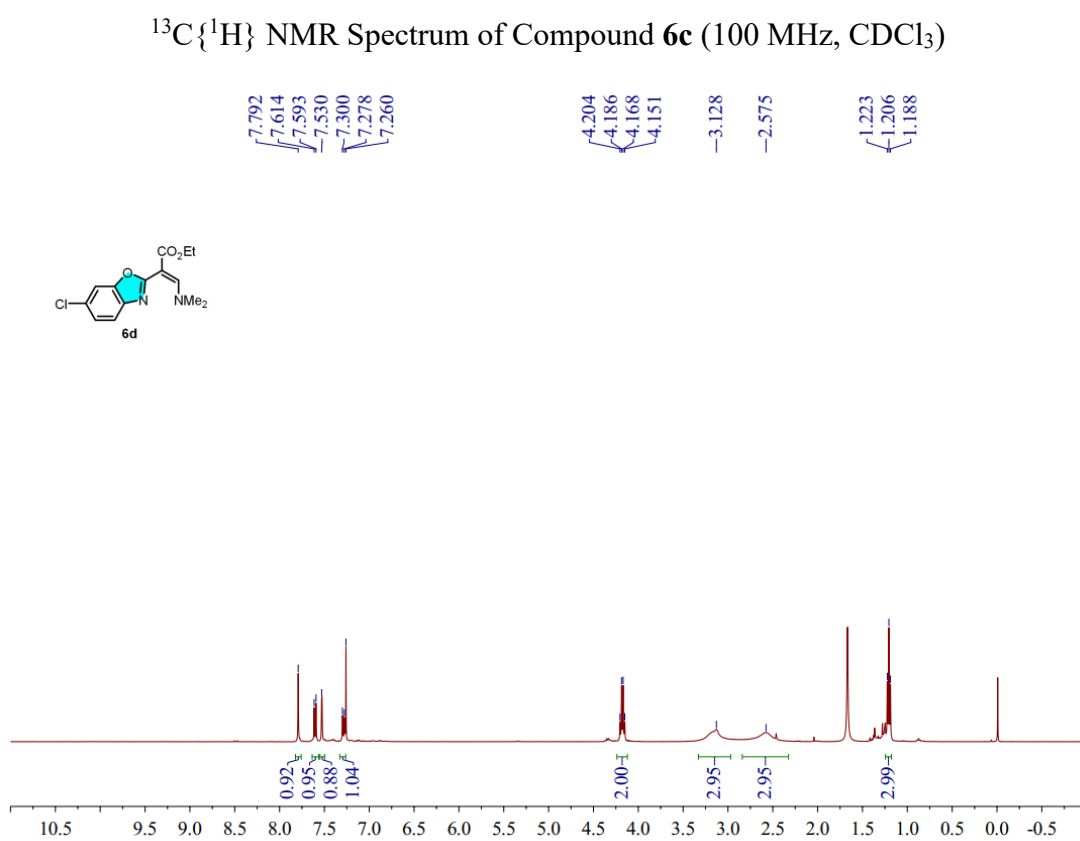

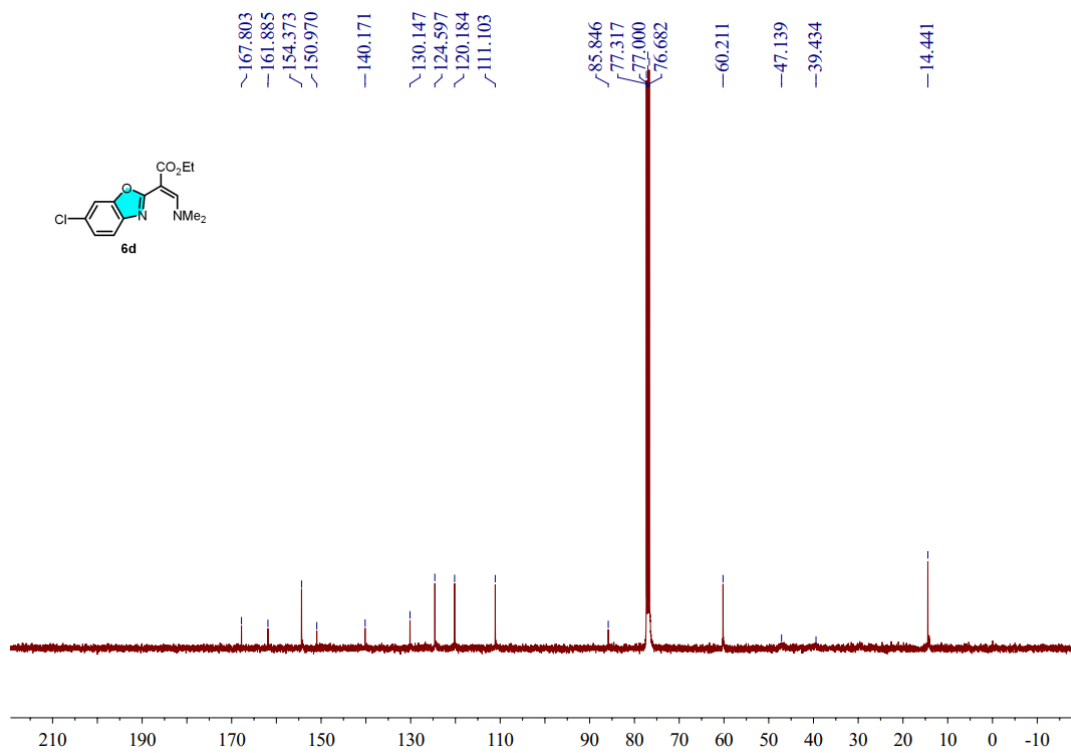

$^{13}\text{C}\{^1\text{H}\}$  NMR Spectrum of Compound **6d** (100 MHz,  $\text{CDCl}_3$ )

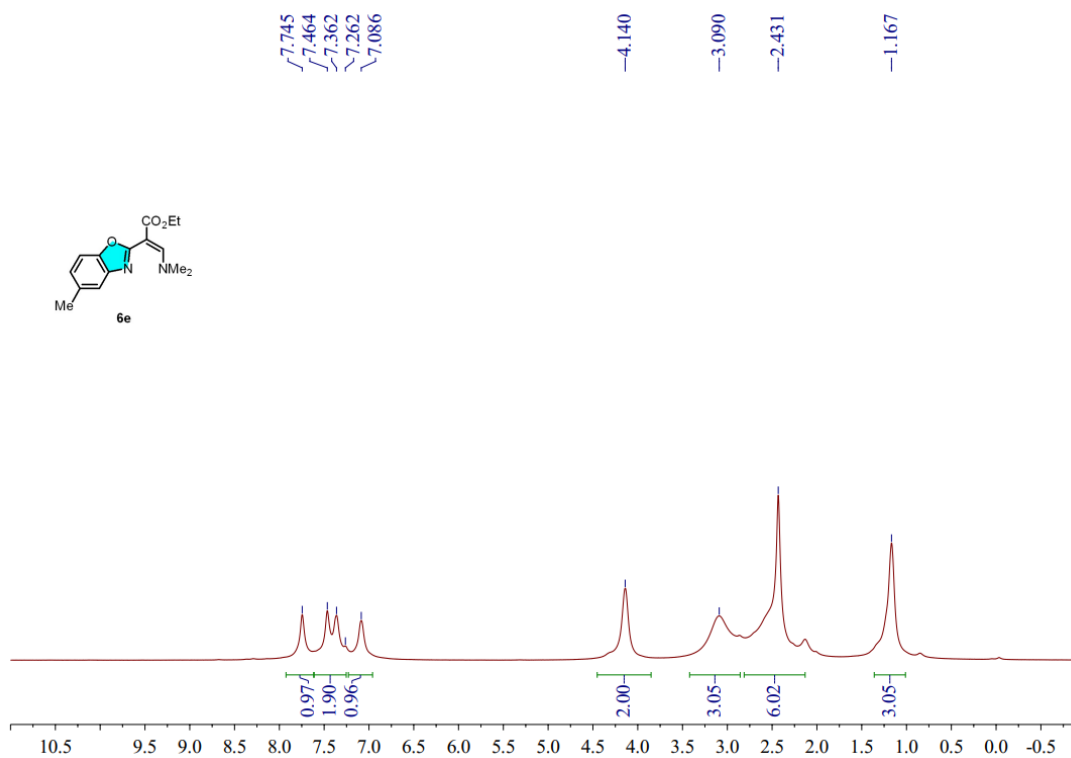

$^1\text{H}$  NMR Spectrum of Compound **6e** (400 MHz,  $\text{CDCl}_3$ )

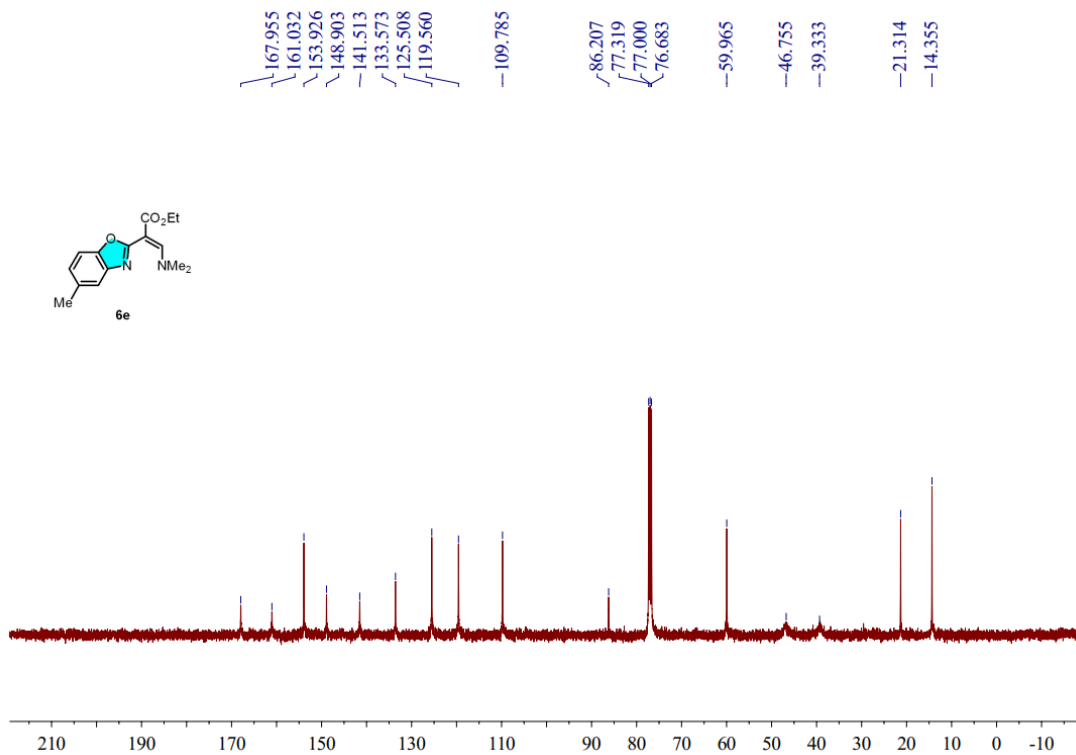

$^{13}\text{C}\{^1\text{H}\}$  NMR Spectrum of Compound **6e** (100 MHz,  $\text{CDCl}_3$ )

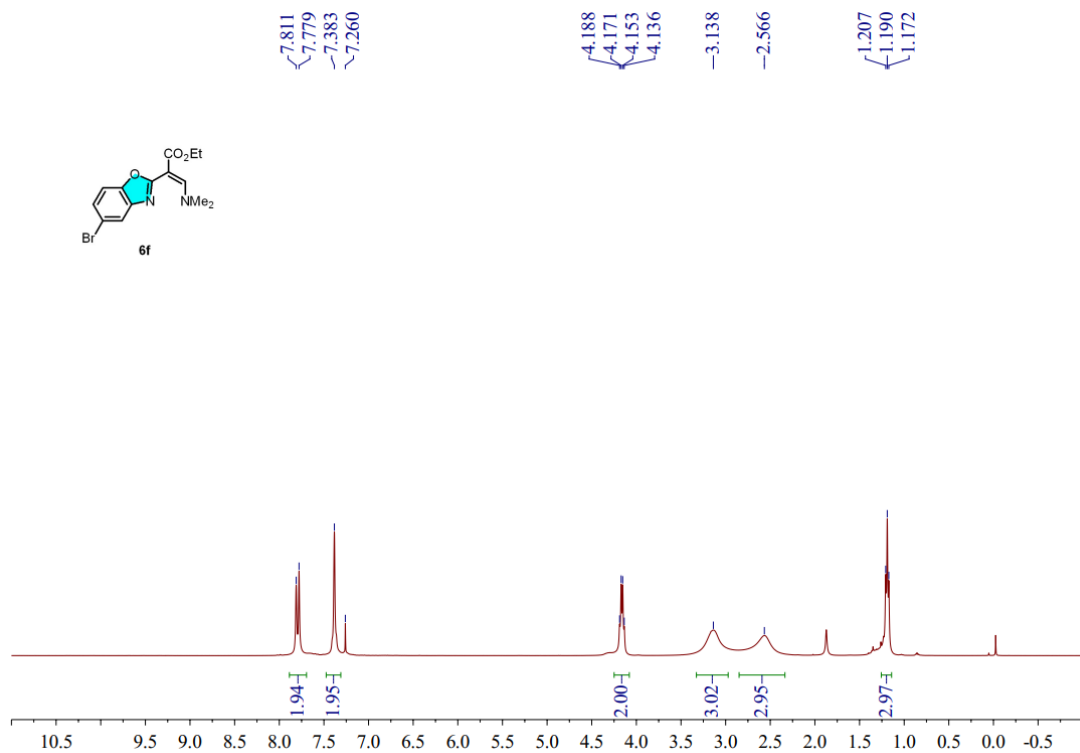

$^1\text{H}$  NMR Spectrum of Compound **6f** (400 MHz,  $\text{CDCl}_3$ )



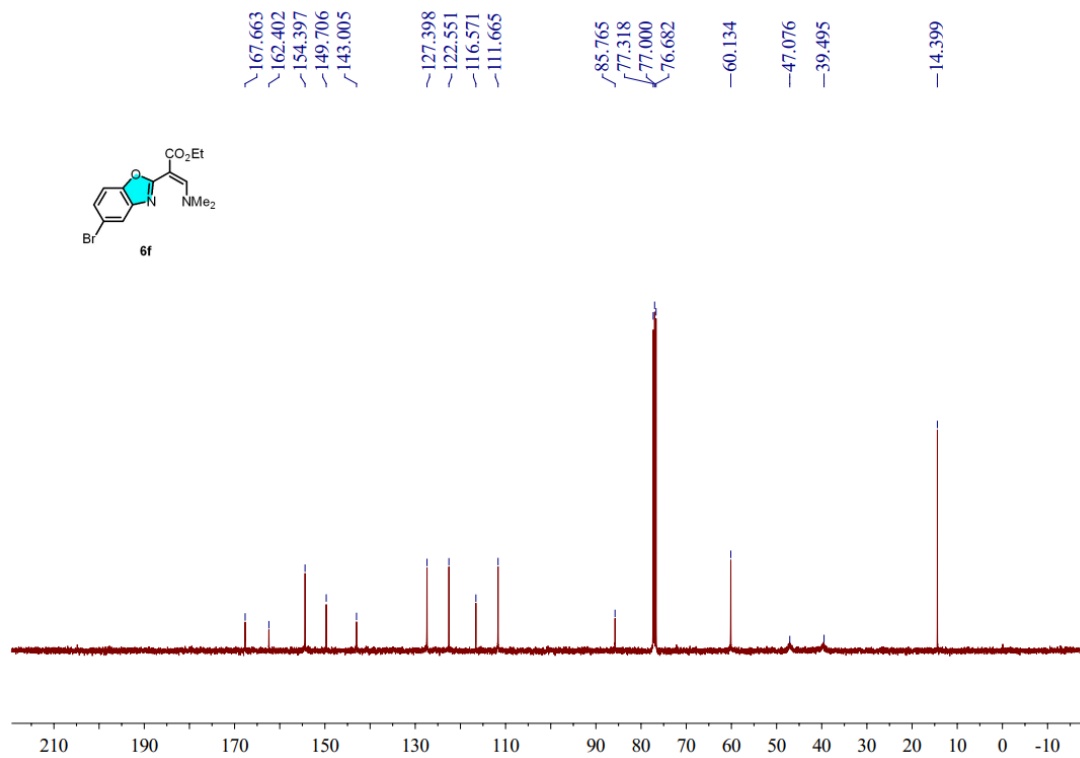

<sup>13</sup>C{<sup>1</sup>H} NMR Spectrum of Compound **6f** (100 MHz, CDCl<sub>3</sub>)

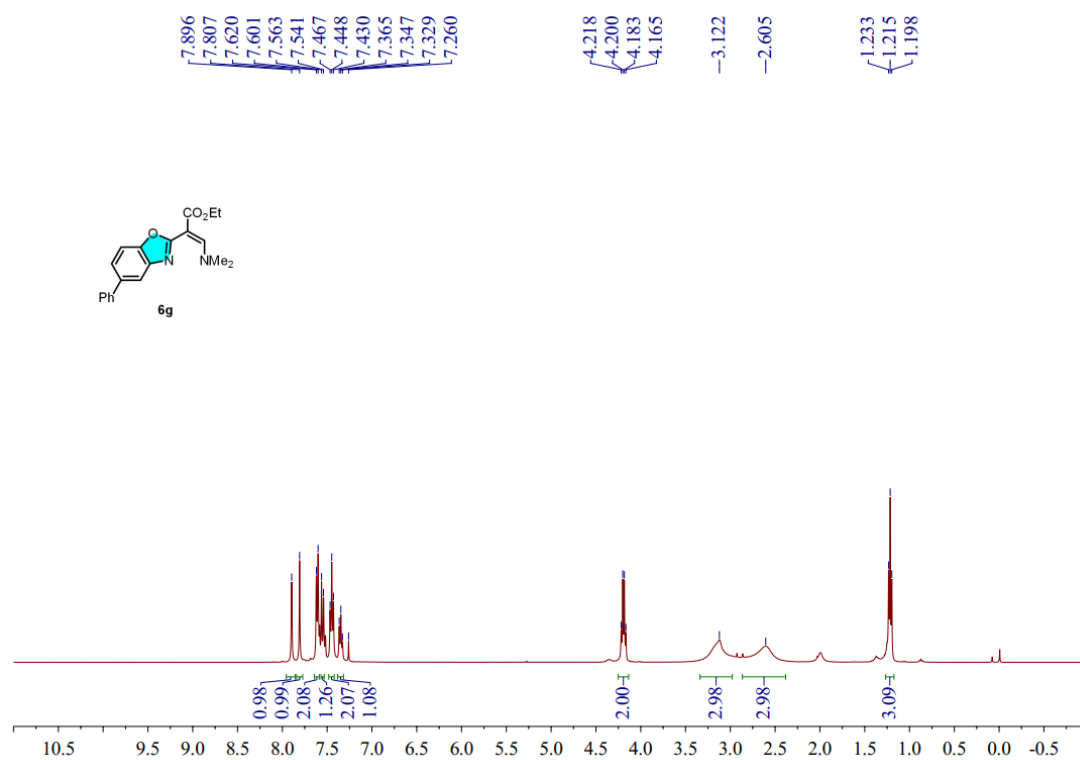

<sup>1</sup>H NMR Spectrum of Compound **6g** (400 MHz, CDCl<sub>3</sub>)

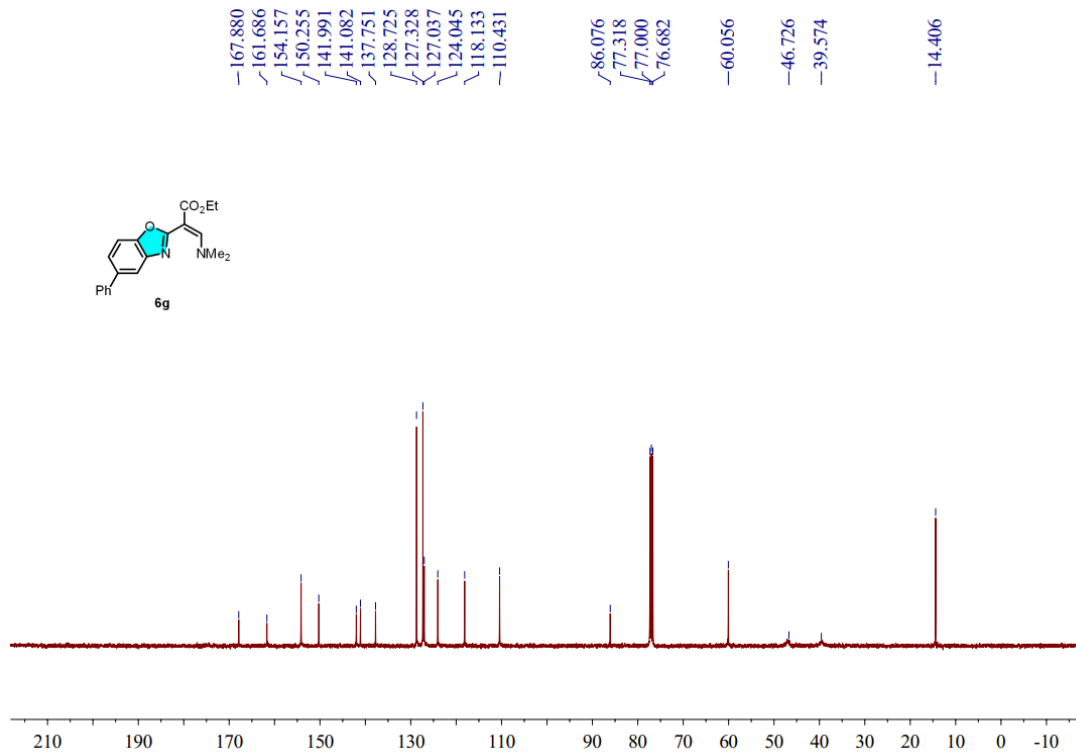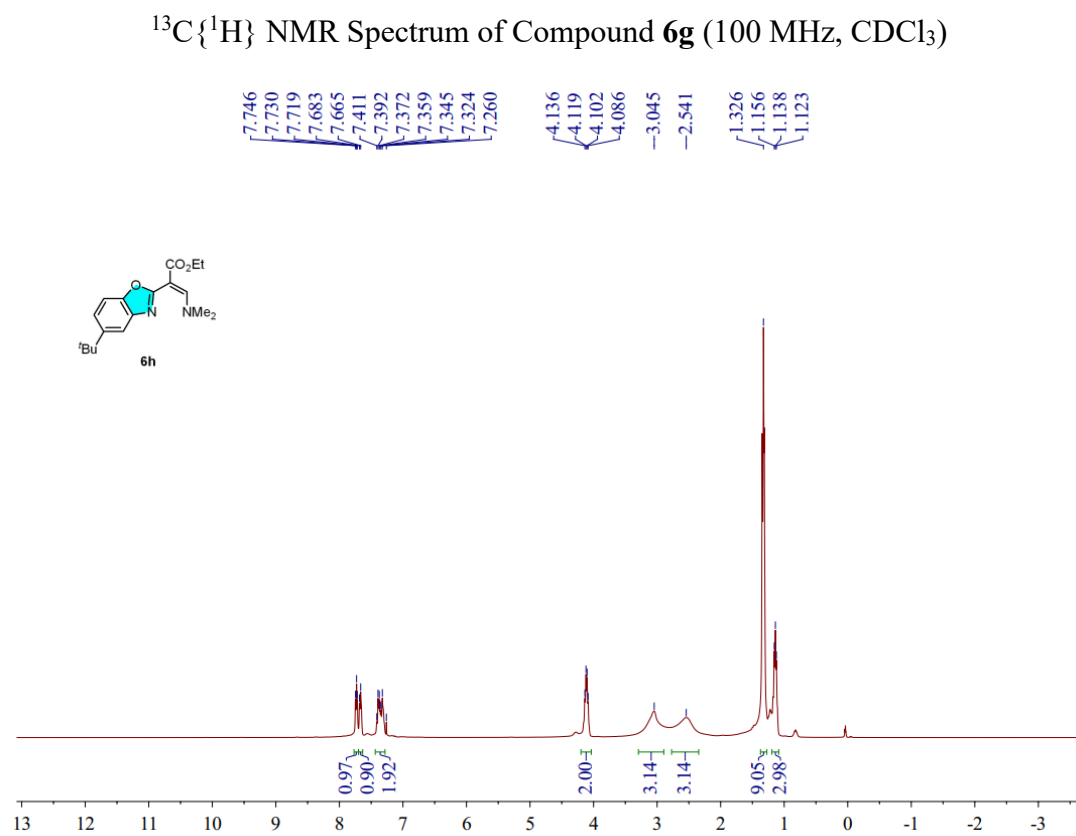

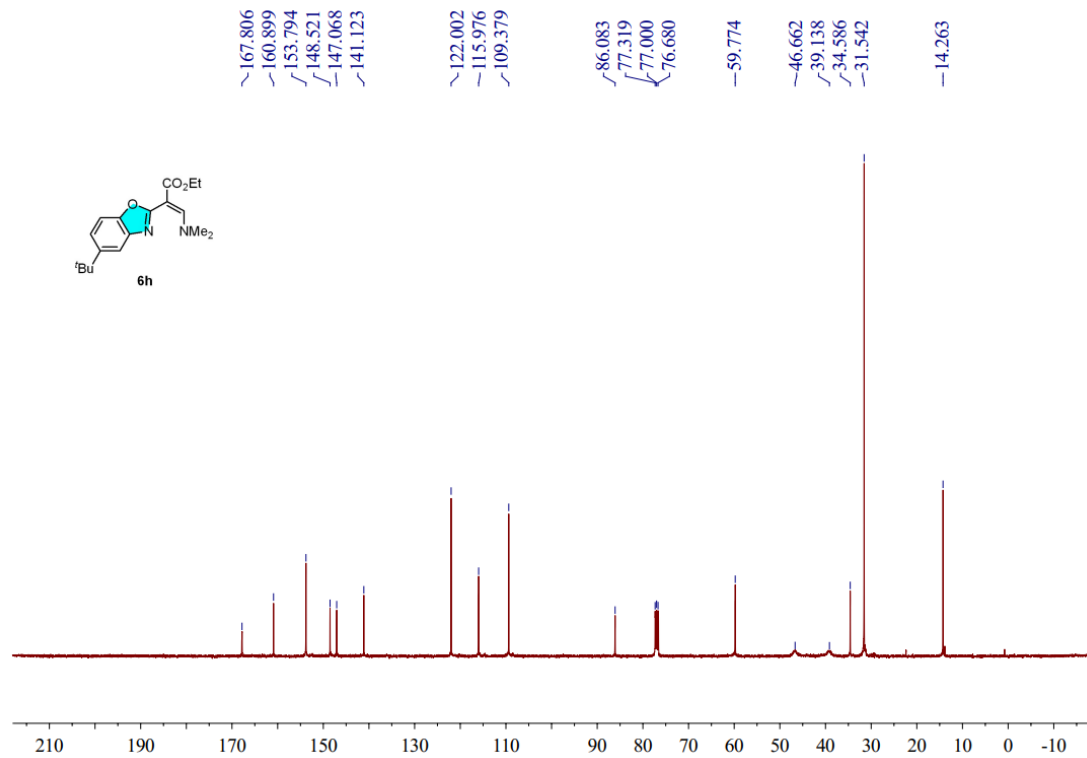

**<sup>13</sup>C{<sup>1</sup>H} NMR Spectrum of Compound **6h** (100 MHz, CDCl<sub>3</sub>)**

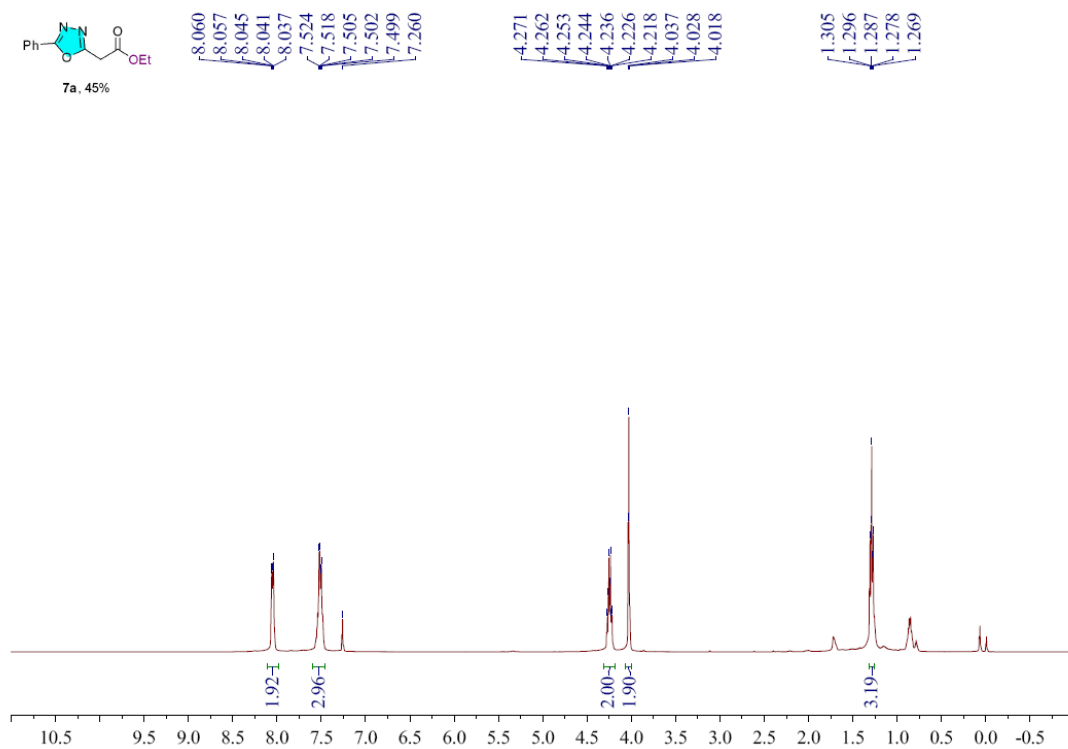

**<sup>1</sup>H NMR Spectrum of Compound **7a** (400 MHz, CDCl<sub>3</sub>)**

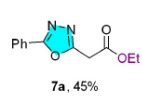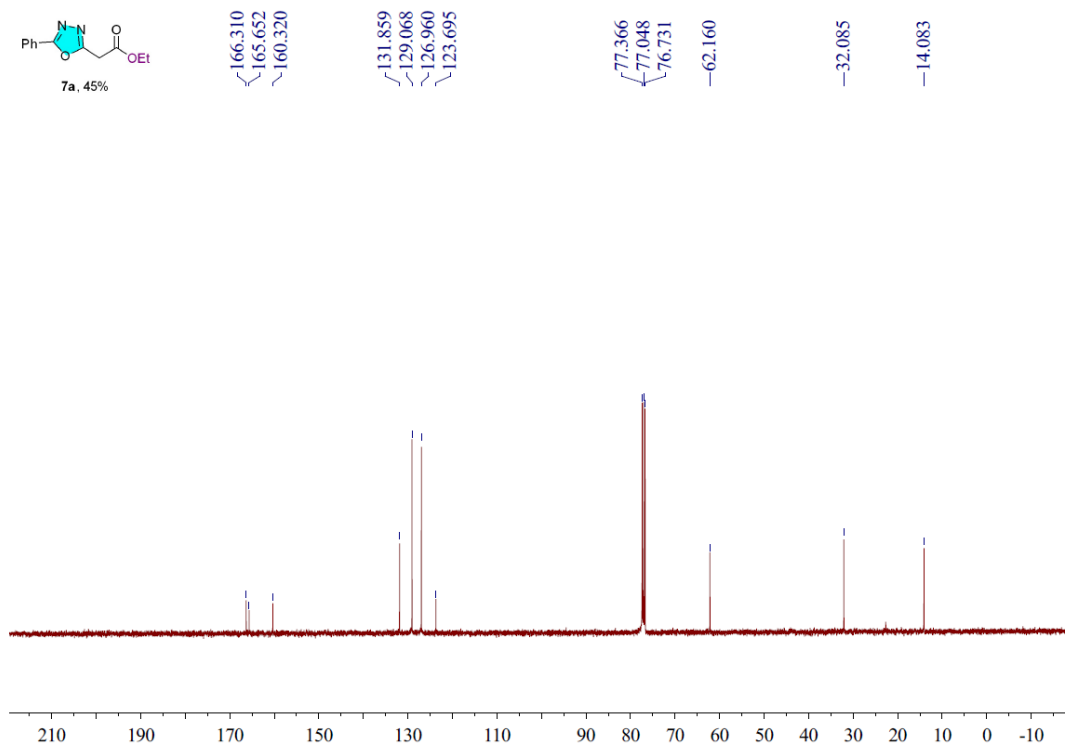

$^{13}\text{C}\{^1\text{H}\}$  NMR Spectrum of Compound **7a** (100 MHz,  $\text{CDCl}_3$ )
